# Supplementary material for: With metal or not? a computationally predicted rule for a dirhodium catalyst in [3+3] cycloadditions of triazole with thiirane
Source: Royal Society of Chemistry journal article supplement (doi:10.1039/d0cc01293a), 2020-01-01
Supplement: d0cc01293a1.pdf [file d0cc01293a1.pdf]

# With Metal or Not? A Computationally Predicted Rule for Dirhodium Catalyst in [3+3] Cycloadditions of Triazole with Thiirane

Shi-Jun Li,<sup>a</sup> Xue Li,<sup>a</sup> Ling-Bo Qu,<sup>a</sup> Donghui Wei,<sup>\*a</sup> Yu Lan<sup>\*ab</sup>

<sup>a</sup>College of Chemistry, and Institute of Green Catalysis, Zhengzhou University, 100 Science Avenue, Zhengzhou, Henan, 450001, P. R. China

<sup>b</sup>School of Chemistry and Chemical Engineering, and Chongqing Key Laboratory of Theoretical and Computational Chemistry, Chongqing University, Chongqing 400030, P. R. China

- S1. Computational Details. Page 2
- S2. The energies, entropies and Gibbs free energies in both gas-phase and solution-phase. Page 4
- S3. The estimation of rate determined free energy barrier. Page 5
- S4. The energies, entropies and Gibbs free energies for the different catalysts. Page 6
- S5. The transformation of  $\alpha,\beta$ -unsaturated Rh-carbene **M2** Page 7
- S6. The coordinates of stationary points. Page 8

## S1. Computational Details

All theoretical calculations in this study were performed in the Gaussian16 program package.<sup>1</sup> All structures were optimized using B3LYP,<sup>2</sup> in conjunction with the DZVP basis set.<sup>3</sup> The self-consistent reaction field (SCRF) polarizable continuum model (PCM)<sup>4</sup> with IDSRCF radii<sup>5</sup> was applied to simulate the solvent effect and toluene was employed as solvent, which is methodologically abbreviated as the B3LYP-IDSCRF/DZVP. All the optimized stationary points had been identified as minima (zero imaginary frequencies) and transition states (one imaginary frequency), *via* the vibrational analysis. The solution-translational entropy correction has been calculated with THERMO program.<sup>6</sup> The entropy model has been successfully applied to typical cyclization reactions to predict activated entropy in solution. Furthermore, the single point energy at B2PLYP<sup>7</sup>/def2-TZVP<sup>8</sup>+CPCM<sup>9</sup> level has been also computed by using ORCA 4.1.0 program to confirm the results.

Based on the atoms-in-molecules (AIM) theory, the topological properties of the electron density distribution have been analyzed with the wave functions, and the 2-dimensional Laplacian graphs have been plotted with the AIM98PC program package.<sup>11</sup>

1. Frisch, M. J.; Trucks, G. W.; Schlegel, H. B.; Scuseria, G. E.; Robb, M. A.; Cheeseman, J. R.; Scalmani, G.; Barone, V.; Petersson, G. A.; Nakatsuji, H.; Li, X.; Caricato, M.; Marenich, A. V.; Bloino, J.; Janesko, B. G.; Gomperts, R.; Mennucci, B.; Hratchian, H. P.; Ortiz, J. V.; Izmaylov, A. F.; Sonnenberg, J. L.; Williams-Young, D.; Ding, F.; Lipparini, F.; Egidi, F.; Goings, J.; Peng, B.; Petrone, A.; Henderson, T.; Ranasinghe, D.; Zakrzewski, V. G.; Gao, J.; Rega, N.; Zheng, G.; Liang, W.; Hada, M.; Ehara, M.; Toyota, K.; Fukuda, R.; Hasegawa, J.; Ishida, M.; Nakajima, T.; Honda, Y.; Kitao, O.; Nakai, H.; Vreven, T.; Throssell, K.; Montgomery Jr., J. A.; Peralta, J. E.; Ogliaro, F.; Bearpark, M. J.; Heyd, J. J.; Brothers, E. N.; Kudin, K. N.; Staroverov, V. N.; Keith, T. A.; Kobayashi, R.; Normand, J.; Raghavachari, K.; Rendell, A. P.; Burant, J. C.; Iyengar, S. S.; Tomasi, J.; Cossi, M.; Millam, J. M.; Klene, M.; Adamo, C.; Cammi, R.; Ochterski, J. W.; Martin, R. L.; Morokuma, K.; Farkas, O.; Foresman, J. B.; Fox, D. J. *Gaussian16*, Gaussian, Inc., Wallingford, CT, 2016.

2. (a) Lee, C.; Yang, W.; Parr, R.G.; Development of the Colle-Salvetti Correlation-Energy Formula into a Functional of the Electron Density, *Phys. Rev. B: Condens. Matter Mater. Phys.* 1988, **37**, 785-789; (b) Becke, A.D. Density-Functional Thermochemistry. III. The role of Exact Exchange, *J. Chem. Phys.* 1993, **98**, 5648-5652.
3. (a) Godbout, N.; Salahub, D. R.; Andzelm, J.; Wimmer, E. Optimization of Gaussian-Type Basis-Sets for Local Spin-Density Functional Calculations .1. Boron Through Neon, Optimization Technique and Validation, *Can. J. Chem.* 1992, **70**, 560–571. (b) Sosa, C.; Andzelm, J.; Elkin, B. C.; Wimmer, E.; Dobbs, K. D.; Dixon, D. A. A Local Density Functional Study of the Structure and Vibrational Frequencies of Molecular Transition-Metal Compounds, *J. Phys. Chem.* 1992, **96**, 6630–6636.
4. Scalmani, G.; Frisch, M. J. Continuous Surface Charge Polarizable Continuum Models of Solvation. I. General formalism, *J. Chem. Phys.* **2010**, *132*, 114110-24.
5. Tao, J.-Y.; Mu, W.-H.; Chass, G. A.; Tang, T.-H.; Fang, D.-C. Balancing the Atomic Waistline: Isodensity-based SCRF Radii for Main-group Elements and Transition Metals, *Int. J. Quantum Chem.* **2013**, *113*, 975–984.
6. Fang, D.-C. THERMO; Beijing Normal University, Beijing, People’s Republic of China, 2013.
7. Grimme, S. “Semiempirical hybrid density functional with perturbative second-order correlation,” *J. Chem. Phys.*, **2006**, *124*, 034108.
8. Weigend F.; Ahlrichs, R. “Balanced basis sets of split valence, triple zeta valence and quadruple zeta valence quality for H to Rn: Design and assessment of accuracy,” *Phys. Chem. Chem. Phys.*, **2005**, *7*, 3297-305.
9. Barone, V. Cossi, M. “Quantum calculation of molecular energies and energy gradients in solution by a conductor solvent model,” *J. Phys. Chem. A*, **1998**, *102*, 1995-2001.
10. (a) Neese, F. Wennmohs, F. ORCA(4.1.0)-An ab initio, DFT and semiempirical SCF-MO package, Max-Planck-Institute for Chemical Energy Conversion, Stiftstr. 34-36, 45470 Mulheim a. d. Ruhr, Germany; (b) Neese, F. *Wiley Interdiscip. Rev.: Comput. Mol. Sci.*, **2012**, *2*, 73–78
11. (a)Bader, R. F. W.; *Atoms in Molecules: A Quantum Theory*, Oxford University, Oxford, 1990.(b) D.-C. Fang, T.-H. Tang, AIM98PC, Beijing Normal University, Beijing,China, 1998.

## S2. The energies, entropies and Gibbs free energies in both gas-phase and solution-phase.

| Species        | E            | S     | S <sup>sol</sup> | G <sup>sol</sup> | G            | G <sup>1</sup> |
|----------------|--------------|-------|------------------|------------------|--------------|----------------|
| R1             | -1292.29853  | 165.7 | 130.9            | -1292.09190      | -1292.10560  | -1291.55889    |
| CAT            | -11221.13495 | 281.7 | 242.0            | -11220.54141     | -11220.56564 | -2065.039989   |
| COM1           | -12513.42602 | 343.0 | 403.2            | -12512.60516     | -12512.64190 | -3356.584495   |
| TS1            | -12513.39425 | 344.1 | 404.9            | -12512.57689     | -12512.61405 | -3356.562657   |
| M1             | -12513.41227 | 408.9 | 347.8            | -12512.59536     | -12512.63267 | -3356.58272    |
| TS2            | -12513.39710 | 407.3 | 347.3            | -12512.58246     | -12512.61911 | -3356.570842   |
| M2             | -12403.88712 | 335.9 | 393.0            | -12403.07561     | -12403.11051 | -3247.099653   |
| N <sub>2</sub> | -109.53766   | 47.5  | 32.0             | -109.54743       | -109.55694   | -109.5129854   |
| R2             | -707.84337   | 97.2  | 70.2             | -707.73667       | -707.75313   | -707.4463722   |
| TS3            | -13111.73047 | 447.3 | 380.1            | -13110.79514     | -13110.83621 | -3954.533079   |
| M3             | -13111.74955 | 449.9 | 382.0            | -13110.81362     | -13110.85508 | -3954.558487   |
| TS4            | -13111.73799 | 448.0 | 380.1            | -13110.80238     | -13110.84381 | -3954.544152   |
| P              | -1890.66566  | 206.6 | 164.4            | -1890.33860      | -1890.36436  | -1889.567814   |
| TS1'           | -1292.26627  | 167.9 | 130.2            | -1292.06193      | -1292.08492  | -1291.530507   |
| M1'            | -1292.28203  | 172.3 | 134.3            | -1292.07840      | -1292.10161  | -1291.548276   |
| TS2'           | -1292.23670  | 176.8 | 137.3            | -1292.03838      | -1292.06246  | -1291.5092     |
| M2'            | -1182.70833  | 161.8 | 125.1            | -1182.51320      | -1182.53562  | -1182.019517   |

S<sup>sol</sup> and G<sup>sol</sup> are calculated using the Fang's method while the S and G are computed based the output file from Gaussian calculation.  $G^1 = G^{sol} - E + E(B2PLYP/def2-TZVP+CPCM)$

The computed results at B2PLYP/def2-TZVP+CPCM level shows the free energy barrier of three pathways are 22.7, 31.2 and 17.6 kcal/mol, respectively, which would show the similar tendency with the results at B3LYP/DZVP+PCM level. However, the barriers for the reaction would be underestimated which would be not suitable in the system.

### S3 . The estimation of rate determined free energy barrier

Reaction condition: 1a (0.5 mmol, 1.0 equiv.), phenylthiirane 2a (1.0 mmol, 2 equiv.), Cat. (0.01 mmol, 0.02 equiv.), solvent (2 mL), 110 °C.

Yield: 69%

For the pseudo-first-order reaction, the rate constant can be calculated using eq. 1.

$$k = \frac{\ln\left[\frac{1}{1-x}\right]}{t * [Cat.]} \quad (1)$$

x should be the yield. t should be the reaction time. And [Cat] would be the concentration of *Cat.*

For this system, the yield is 69% when the reaction time is 4h. So, the concentration of *Cat.* would be 0.005 mol/L, the rate constant would be  $1.63 \cdot 10^{-2}$  L/mol/s., hence the corresponding free energy barrier be **25.8** kcal/mol.

**S4 . The energies, entropies and Gibbs free energies for the different catalysts at 383.15 K.**

| Species Rh(XCOO) <sub>4</sub>   |     | E            | G <sup>sol</sup> |
|---------------------------------|-----|--------------|------------------|
| X=Me                            | Cat | -10289.43826 | -10289.43826     |
|                                 | TS2 | -11581.86464 | -11581.49077     |
| X=CF <sub>3</sub>               | Cat | -11480.72250 | -11480.67494     |
|                                 | TS2 | -12773.00466 | -12772.73816     |
| X=H                             | Cat | -10132.27404 | -10132.21483     |
|                                 | TS2 | -11424.54781 | -11424.27200     |
| X= CHF <sub>2</sub>             | Cat | -11083.64550 | -11083.55878     |
|                                 | TS2 | -12375.92743 | -12375.62110     |
| X=CH <sub>2</sub> F             | Cat | -10686.59248 | -10686.46682     |
|                                 | TS2 | -11978.87068 | -11978.52808     |
| X=Ph                            | Cat | -11056.61578 | -11056.26781     |
|                                 | TS2 | -12348.88675 | -12348.31710     |
| X=p-<br>OMePh                   | Cat | -11514.33774 | -11514.33774     |
|                                 | TS2 | -12807.07041 | -12806.38623     |
| X=p-<br>NMe <sub>2</sub> Ph     | Cat | -11592.56765 | -11591.95516     |
|                                 | TS2 | -12884.83574 | -12884.00142     |
| X=2,4,6-<br>Cl <sub>3</sub> Ph  | Cat | -16571.30531 | -16571.10023     |
|                                 | TS2 | -17863.58153 | -17863.15552     |
| X=C <sub>6</sub> F <sub>5</sub> | Cat | -13041.65555 | -13041.49983     |
|                                 | TS2 | -14333.93182 | -14333.55707     |
| X=t-Bu                          | Cat | -10761.40566 | -10760.93565     |
|                                 | TS2 | -12053.67546 | -12052.98198     |
| X=p-NO <sub>2</sub> Ph          | Cat | -11874.77914 | -11874.43931     |
|                                 | TS2 | -13167.05551 | -13166.49318     |

## S5. The transformation of $\alpha, \beta$ -unsaturated Rh-carbene **M2**

When  $\alpha, \beta$ -unsaturated Rh-carbene complex **M2** is formed through a mixed processes in Pathway 3, the electronic character of this complex is interesting because it may enable further transformation by stepwise [3+3] cycloaddition. The electrostatic potential map of **M2** shown in **Figure S1** clearly reveals that the carbene moiety exhibits positive character. Therefore, this moiety can be nucleophilically attacked by an extra nucleophile. In these reaction conditions, the lone-pair electrons on the sulfur atom in thiirane act as nucleophiles, reacting with **M2** through an intermolecular nucleophilic addition via transition state **TS3**. As shown in **Figure S1**, the calculated activation free energy for this step is only 8.4 kcal/mol. Then the zwitterionic thiiranium intermediate **M3** is formed, a process that is 3.4 kcal/mol exergonic. The C-S bond in **M3** is 0.13 Å longer than that in **R2**, which indicates that this bond is weakened by the formation of cationic sulfur. Subsequently, an intramolecular nucleophilic substitution by the imine group takes place via transition state **TS4**, leading to the ring opening of thiiranium. The calculated free energy barrier for this step is only 7.1 kcal/mol. In the computed geometry of **TS4**, the bond angle of N-C-S is 116°, the bond lengths of the forming C9-N1 and breaking C9-S7 are 2.61 and 2.91 Å, respectively, which indicates a suprafacial concerted substitution. The irreversible release of thiazine product **P** regenerates active catalyst **Cat** to accomplish the catalytic cycle.

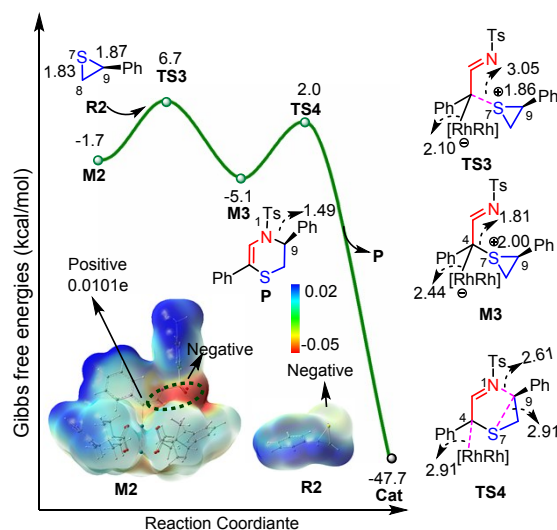

**Figure S1.** Free energy profiles for the [3+3] cycloaddition process of unsaturated Rh-carbene and thiirane. The electrostatic potential map of total density for **M2** and **R2** are also given.

S6. The coordinates of stationary points

|      |          |          |          |    |          |          |          |
|------|----------|----------|----------|----|----------|----------|----------|
| R1   |          |          |          | R2 |          |          |          |
| N    | -1.47930 | -0.07343 | -1.55128 | C  | -0.21324 | 0.30227  | 0.09059  |
| N    | -0.28127 | 0.43213  | -1.53836 | C  | -0.62677 | -1.04116 | 0.13134  |
| C    | -2.10247 | 0.15087  | -0.34005 | C  | -1.18809 | 1.30313  | -0.05154 |
| C    | -1.21490 | 0.83794  | 0.46852  | C  | -1.98086 | -1.36972 | 0.04558  |
| N    | -0.10650 | 0.99694  | -0.31379 | C  | -2.54614 | 0.97467  | -0.13844 |
| H    | -1.26440 | 1.22812  | 1.47488  | C  | -2.94769 | -0.36339 | -0.08789 |
| C    | -4.19874 | -0.99044 | -1.06206 | H  | 0.11441  | -1.83403 | 0.20524  |
| C    | -5.50356 | -1.42387 | -0.81514 | H  | -0.88417 | 2.34799  | -0.09141 |
| C    | -3.47626 | -0.30278 | -0.07008 | H  | -2.28488 | -2.41397 | 0.07666  |
| H    | -6.04991 | -1.95385 | -1.59245 | H  | -3.28659 | 1.76429  | -0.24739 |
| C    | -6.10883 | -1.17877 | 0.42328  | H  | -4.00182 | -0.62292 | -0.15754 |
| C    | -4.09150 | -0.06010 | 1.17173  | C  | 1.21865  | 0.70937  | 0.22019  |
| H    | -7.12529 | -1.51619 | 0.61347  | C  | 2.18157  | -0.01381 | 1.09393  |
| H    | -3.55474 | 0.47186  | 1.95445  | S  | 2.55308  | -0.23159 | -0.68883 |
| C    | -5.39626 | -0.49452 | 1.41574  | H  | 1.37524  | 1.78392  | 0.15180  |
| H    | -5.85753 | -0.29757 | 2.38107  | H  | 1.82796  | -0.90403 | 1.60960  |
| H    | -3.73079 | -1.18013 | -2.02383 | H  | 2.90600  | 0.57601  | 1.65184  |
| S    | 1.42788  | 1.77081  | 0.11571  |    |          |          |          |
| O    | 1.17885  | 2.25091  | 1.47242  |    |          |          |          |
| O    | 1.74589  | 2.66467  | -0.98735 |    |          |          |          |
| C    | 2.56669  | 0.40396  | 0.13935  |    |          |          |          |
| C    | 2.77694  | -0.28468 | 1.33823  |    |          |          |          |
| C    | 3.23696  | 0.05636  | -1.03912 |    |          |          |          |
| C    | 3.67912  | -1.34966 | 1.34668  |    |          |          |          |
| C    | 4.13222  | -1.01171 | -1.00446 |    |          |          |          |
| C    | 4.36489  | -1.73185 | 0.18117  |    |          |          |          |
| H    | 2.26059  | 0.01430  | 2.24627  |    |          |          |          |
| H    | 3.06490  | 0.61173  | -1.95660 |    |          |          |          |
| H    | 3.85545  | -1.88528 | 2.27705  |    |          |          |          |
| H    | 4.66108  | -1.28711 | -1.91467 |    |          |          |          |
| C    | 5.31703  | -2.90469 | 0.19105  |    |          |          |          |
| H    | 5.66986  | -3.12853 | 1.20157  |    |          |          |          |
| H    | 4.82048  | -3.80399 | -0.19381 |    |          |          |          |
| H    | 6.18790  | -2.71674 | -0.44443 |    |          |          |          |
| Cat. |          |          |          | C  | 0.39281  | -2.23513 | 1.82307  |
| C    | -1.89208 | -1.82783 | 0.15218  | O  | 0.62925  | -1.05226 | 1.41367  |
| O    | -1.48986 | -1.43020 | -0.98997 | O  | -0.58872 | -2.95695 | 1.43071  |
| O    | -1.43039 | -1.41295 | 1.27068  | Rh | -1.90130 | -2.21332 | 0.00569  |
| Rh   | 0.09051  | 0.01311  | 1.29295  | Rh | -0.59451 | -0.20383 | -0.04399 |
| Rh   | -0.01049 | 0.03267  | -1.09859 | C  | -2.77407 | -0.17193 | 1.90805  |
| C    | 1.87560  | -1.91637 | 0.00074  | O  | -1.83042 | 0.54810  | 1.44659  |
| O    | 1.43006  | -1.46382 | -1.10437 | O  | -3.03553 | -1.36429 | 1.52753  |
| O    | 1.50315  | -1.51436 | 1.15574  | C  | 0.29917  | -2.28186 | -1.91568 |
| C    | -1.84064 | 1.91678  | 0.19377  | O  | 0.56051  | -1.08795 | -1.54774 |
| O    | -1.46020 | 1.52512  | -0.95927 | O  | -0.68978 | -2.97226 | -1.49658 |
| O    | -1.34175 | 1.51989  | 1.30039  | C  | -2.87616 | -0.20181 | -1.88144 |
| C    | 1.95135  | 1.88809  | 0.03202  | O  | -1.89806 | 0.51925  | -1.49820 |
| O    | 1.47184  | 1.48897  | -1.07911 | O  | -3.13234 | -1.37636 | -1.44746 |
| O    | 1.58387  | 1.46154  | 1.18009  | C  | 1.33424  | -2.86072 | 2.86899  |
| C    | -3.01621 | -2.87950 | 0.20927  | C  | 1.24128  | -2.93065 | -2.94706 |
| C    | -2.97609 | 2.95468  | 0.24351  | C  | -3.82020 | 0.35727  | -2.96177 |
| C    | 3.04233  | 2.97408  | 0.00415  | C  | -3.66308 | 0.41431  | 3.02026  |
| C    | 2.92770  | -3.03970 | -0.04538 | C  | -3.68801 | -0.55137 | -4.20755 |
| C    | 2.49432  | 4.20941  | 0.75733  | H  | -3.94580 | -1.58795 | -3.97324 |
| H    | 2.22698  | 3.96077  | 1.78797  | H  | -4.35945 | -0.19629 | -4.99760 |
| H    | 3.25493  | 4.99801  | 0.77605  | H  | -2.66629 | -0.53147 | -4.60356 |
| H    | 1.60617  | 4.61326  | 0.25836  | C  | -3.43686 | 1.79948  | -3.32984 |
| C    | 3.38719  | 3.36255  | -1.44350 | H  | -4.11987 | 2.17327  | -4.10194 |
| H    | 4.15752  | 4.14244  | -1.43799 | H  | -3.48720 | 2.46748  | -2.46774 |
| H    | 3.76193  | 2.51100  | -2.01584 | H  | -2.41837 | 1.84454  | -3.72659 |
| H    | 2.50942  | 3.75460  | -1.96502 | C  | 1.04585  | -2.15041 | -4.27199 |



|   |          |          |          |   |          |          |          |
|---|----------|----------|----------|---|----------|----------|----------|
| C | -2.36388 | 4.29128  | -0.25037 | H | 1.68725  | -2.57643 | -5.05147 |
| H | -3.13017 | 5.07433  | -0.24491 | H | 1.30283  | -1.09403 | -4.15262 |
| H | -1.97217 | 4.19760  | -1.26744 | C | 0.88816  | -4.41169 | -3.17205 |
| C | -3.50862 | 3.14209  | 1.67597  | H | -0.14066 | -4.52695 | -3.52420 |
| H | -2.71354 | 3.45937  | 2.35581  | H | 1.55980  | -4.83051 | -3.93035 |
| H | -4.28562 | 3.91502  | 1.67224  | H | 0.99785  | -5.00297 | -2.25987 |
| H | -3.94766 | 2.22563  | 2.07745  | C | 0.47576  | -3.20085 | 4.11124  |
| C | -2.51145 | -4.06455 | 1.06599  | H | -0.31583 | -3.91501 | 3.86830  |
| H | -2.26869 | -3.74700 | 2.08342  | H | 1.11136  | -3.63642 | 4.89029  |
| H | -3.28475 | -4.83903 | 1.11741  | H | 0.00986  | -2.29977 | 4.52586  |
| H | -1.61497 | -4.51601 | 0.62617  | C | 2.45209  | -1.88131 | 3.26036  |
| C | -3.37597 | -3.37329 | -1.20160 | H | 3.10405  | -2.35544 | 4.00385  |
| H | -4.17480 | -4.12097 | -1.13428 | H | 3.06259  | -1.58696 | 2.40504  |
| H | -3.72077 | -2.55959 | -1.84307 | H | 2.03909  | -0.96956 | 3.70201  |
| H | -2.51327 | -3.84050 | -1.68599 | C | -3.47066 | -0.46367 | 4.28005  |
| C | 2.33692  | -4.26837 | 0.68569  | H | -2.43085 | -0.43524 | 4.62473  |
| H | 1.43426  | -4.63044 | 0.18083  | H | -4.10243 | -0.08715 | 5.09257  |
| H | 3.06895  | -5.08372 | 0.68813  | H | -3.74013 | -1.50537 | 4.08491  |
| H | 2.07932  | -4.02983 | 1.72109  | C | -3.25966 | 1.86427  | 3.33399  |
| C | 3.26086  | -3.41442 | -1.49942 | H | -3.36117 | 2.51368  | 2.46184  |
| H | 3.66157  | -2.56561 | -2.05790 | H | -3.89817 | 2.25482  | 4.13539  |
| H | 4.00674  | -4.21771 | -1.50725 | H | -2.22008 | 1.91745  | 3.66938  |
| H | 2.37147  | -3.77083 | -2.02699 | C | -5.16580 | 0.32697  | 2.58871  |
| C | 4.21134  | -2.58178 | 0.72666  | H | -5.75394 | 0.74039  | 3.41680  |
| H | 4.92879  | -3.40813 | 0.65924  | H | -5.42987 | -0.73185 | 2.50509  |
| H | 3.94718  | -2.47163 | 1.78298  | C | -5.29894 | 0.27950  | -2.45319 |
| C | 4.30961  | 2.45755  | 0.76610  | H | -5.92935 | 0.67781  | -3.25721 |
| H | 5.05795  | 3.25673  | 0.70821  | H | -5.55774 | -0.77730 | -2.33572 |
| H | 4.04386  | 2.34233  | 1.82142  | C | 1.92621  | -4.19840 | 2.30674  |
| C | -4.26710 | -2.26005 | 0.92350  | H | 2.45520  | -4.68051 | 3.13697  |
| H | -4.98816 | -3.07497 | 1.05510  | H | 1.08778  | -4.85225 | 2.04219  |
| H | -3.95840 | -1.94279 | 1.92539  | C | -5.52353 | 1.03808  | 1.29734  |
| C | 4.85126  | -1.29840 | 0.23366  | C | -6.02007 | 2.35086  | 1.28381  |
| C | 5.87622  | -1.29683 | -0.72568 | C | -5.34630 | 0.38331  | 0.06996  |
| C | 4.40260  | -0.06499 | 0.72762  | C | -6.30855 | 2.98540  | 0.07080  |
| C | 6.41437  | -0.08908 | -1.18326 | H | -6.18970 | 2.87638  | 2.22229  |
| H | 6.26115  | -2.23951 | -1.11044 | C | -5.58802 | 1.01513  | -1.15849 |
| C | 4.89865  | 1.15791  | 0.25271  | H | -5.00256 | -0.64655 | 0.07065  |
| H | 3.63620  | -0.05611 | 1.49744  | C | -6.08351 | 2.32817  | -1.14373 |
| C | 5.92319  | 1.13140  | -0.70672 | H | -6.70707 | 3.99819  | 0.07184  |
| H | 7.21870  | -0.09891 | -1.91596 | H | -6.30340 | 2.83596  | -2.08156 |
| H | 6.34455  | 2.06435  | -1.07679 | C | 2.87019  | -4.06414 | 1.12496  |
| C | -4.93638 | -1.10725 | 0.19839  | C | 2.37866  | -3.64374 | -0.12032 |
| C | -4.32242 | 0.15553  | 0.17611  | C | 4.24082  | -4.32762 | 1.24421  |
| C | -6.14807 | -1.27244 | -0.48463 | C | 3.21017  | -3.41608 | -1.22254 |
| C | -4.84374 | 1.23263  | -0.54993 | H | 1.31093  | -3.49852 | -0.21067 |
| H | -3.41238 | 0.27566  | 0.75090  | C | 5.08575  | -4.16533 | 0.13912  |
| C | -6.71645 | -0.19559 | -1.17711 | H | 4.65064  | -4.65878 | 2.19717  |
| H | -6.64968 | -2.23850 | -0.47712 | C | 4.57858  | -3.70412 | -1.07828 |
| C | -6.06641 | 1.04003  | -1.21807 | H | 6.14767  | -4.38466 | 0.23315  |
| H | -7.66401 | -0.32479 | -1.69607 | H | 5.25343  | -3.55159 | -1.91964 |
| H | -6.50743 | 1.86131  | -1.78138 | H | 0.00831  | -2.21804 | -4.61846 |
| H | -1.54871 | 4.61467  | 0.40624  | C | 2.72443  | -2.76415 | -2.51065 |
| C | -4.11343 | 2.55789  | -0.73659 | H | 3.34015  | -3.13048 | -3.34161 |
| H | -4.84945 | 3.37106  | -0.71569 | H | 2.93360  | -1.69153 | -2.42619 |
| H | -3.69513 | 2.55625  | -1.75008 | N | 1.46970  | 2.88642  | 1.62034  |
|   |          |          |          | N | 2.54556  | 2.16023  | 1.59068  |
|   |          |          |          | C | 0.86951  | 2.89629  | 0.37427  |
|   |          |          |          | C | 1.63327  | 2.09868  | -0.46431 |
|   |          |          |          | N | 2.65711  | 1.66011  | 0.33245  |
|   |          |          |          | H | 1.56429  | 1.82423  | -1.50744 |
|   |          |          |          | C | -1.01734 | 4.32517  | 1.15042  |
|   |          |          |          | C | -2.10221 | 5.16437  | 0.89034  |
|   |          |          |          | C | -0.30754 | 3.73174  | 0.09181  |
|   |          |          |          | H | -2.64398 | 5.61578  | 1.71874  |
|   |          |          |          | C | -2.49424 | 5.42460  | -0.42803 |
|   |          |          |          | C | -0.70944 | 3.99400  | -1.22943 |

|     |          |          |          |          |
|-----|----------|----------|----------|----------|
|     | H        | -3.33904 | 6.07972  | -0.62935 |
|     | H        | -0.17065 | 3.54965  | -2.06323 |
|     | C        | -1.79356 | 4.83479  | -1.48654 |
|     | H        | -2.08983 | 5.03289  | -2.51424 |
|     | H        | -0.71088 | 4.12500  | 2.17276  |
|     | S        | 4.16320  | 0.86786  | -0.16851 |
|     | O        | 3.88421  | 0.46563  | -1.54355 |
|     | O        | 4.49064  | -0.07380 | 0.88780  |
|     | C        | 5.32929  | 2.21623  | -0.15559 |
|     | C        | 5.55405  | 2.93342  | -1.33369 |
|     | C        | 6.00439  | 2.52067  | 1.03293  |
|     | C        | 6.47642  | 3.98255  | -1.31279 |
|     | C        | 6.91862  | 3.57199  | 1.02832  |
|     | C        | 7.16800  | 4.31921  | -0.13816 |
|     | H        | 5.03290  | 2.66953  | -2.24977 |
|     | H        | 5.81876  | 1.94522  | 1.93530  |
|     | H        | 6.66146  | 4.54157  | -2.22748 |
|     | H        | 7.44902  | 3.81522  | 1.94701  |
|     | C        | 8.16026  | 5.45837  | -0.11466 |
|     | H        | 9.14305  | 5.11558  | 0.22754  |
|     | H        | 8.28281  | 5.90737  | -1.10381 |
|     | H        | 7.83361  | 6.24462  | 0.57557  |
| TS1 |          |          |          |          |
| C   | 0.46350  | -2.18987 | 1.71883  |          |
| O   | 0.66349  | -0.97993 | 1.36839  |          |
| O   | -0.52346 | -2.90420 | 1.33342  |          |
| Rh  | -1.92088 | -2.11588 | 0.01590  |          |
| Rh  | -0.63326 | -0.07696 | -0.00167 |          |
| C   | -2.72016 | -0.18023 | 2.06393  |          |
| O   | -1.81513 | 0.58169  | 1.58856  |          |
| O   | -2.98278 | -1.35458 | 1.64073  |          |
| C   | 0.18675  | -2.06326 | -2.01163 |          |
| O   | 0.46549  | -0.88890 | -1.59319 |          |
| O   | -0.78129 | -2.77678 | -1.58711 |          |
| C   | -3.02149 | -0.04601 | -1.72116 |          |
| O   | -2.03103 | 0.67078  | -1.36526 |          |
| O   | -3.24380 | -1.23981 | -1.32419 |          |
| C   | 1.45795  | -2.86406 | 2.68409  |          |
| C   | 1.08178  | -2.65541 | -3.11772 |          |
| C   | -4.03270 | 0.54486  | -2.72210 |          |
| C   | -3.55659 | 0.33398  | 3.25205  |          |
| C   | -3.96336 | -0.31153 | -4.00945 |          |
| H   | -4.19195 | -1.36088 | -3.80324 |          |
| H   | -4.68517 | 0.06403  | -4.74379 |          |
| H   | -2.96727 | -0.25888 | -4.46348 |          |
| C   | -3.68791 | 2.00480  | -3.05326 |          |
| H   | -4.41388 | 2.39748  | -3.77546 |          |
| H   | -3.70251 | 2.64028  | -2.16587 |          |
| H   | -2.69069 | 2.08247  | -3.49448 |          |
| C   | 0.84001  | -1.79897 | -4.38639 |          |
| H   | 1.44381  | -2.18460 | -5.21544 |          |
| H   | 1.11273  | -0.75321 | -4.21800 |          |
| C   | 0.70495  | -4.11846 | -3.41227 |          |
| H   | -0.33857 | -4.20509 | -3.72748 |          |
| H   | 1.34096  | -4.49808 | -4.22043 |          |
| H   | 0.84631  | -4.76149 | -2.54034 |          |
| C   | 0.66392  | -3.23889 | 3.95953  |          |
| H   | -0.15224 | -3.93102 | 3.73463  |          |
| H   | 1.33389  | -3.71374 | 4.68496  |          |
| H   | 0.23721  | -2.34763 | 4.43382  |          |
| C   | 2.61328  | -1.91931 | 3.04932  |          |
| H   | 3.29413  | -2.43170 | 3.73979  |          |
| H   | 3.18455  | -1.60516 | 2.17369  |          |
| H   | 2.24058  | -1.01843 | 3.54609  |          |
| C   | -3.28813 | -0.60688 | 4.45076  |          |
| H   | -2.23238 | -0.58045 | 4.74368  |          |
| H   | -3.88285 | -0.28669 | 5.31376  |          |
| M1  |          |          |          |          |
| C   | -0.29928 | -2.33875 | -1.64602 |          |
| O   | -0.54217 | -1.11038 | -1.39584 |          |
| O   | 0.68911  | -2.99494 | -1.17352 |          |
| Rh  | 2.01643  | -2.08000 | 0.14550  |          |
| Rh  | 0.66474  | -0.08933 | -0.03544 |          |
| C   | 2.84445  | -0.25590 | -2.00058 |          |
| O   | 1.89406  | 0.50703  | -1.61566 |          |
| O   | 3.12848  | -1.38297 | -1.48057 |          |
| C   | -0.18027 | -1.96250 | 2.06930  |          |
| O   | -0.48198 | -0.83388 | 1.55114  |          |
| O   | 0.82896  | -2.66893 | 1.73847  |          |
| C   | 2.95976  | 0.13624  | 1.79209  |          |
| O   | 1.96605  | 0.79347  | 1.34048  |          |
| O   | 3.24714  | -1.06833 | 1.47941  |          |
| C   | -1.24545 | -3.10062 | -2.59423 |          |
| C   | -1.10002 | -2.50305 | 3.18086  |          |
| C   | 3.89201  | 0.82802  | 2.80539  |          |
| C   | 3.71165  | 0.20607  | -3.18719 |          |
| C   | 3.82776  | 0.02303  | 4.12528  |          |
| H   | 4.12624  | -1.01789 | 3.97325  |          |
| H   | 4.49821  | 0.47292  | 4.86639  |          |
| H   | 2.81445  | 0.03301  | 4.54261  |          |
| C   | 3.44685  | 2.27612  | 3.06333  |          |
| H   | 4.11107  | 2.73580  | 3.80496  |          |
| H   | 3.47272  | 2.87914  | 2.15406  |          |
| H   | 2.42518  | 2.31077  | 3.45162  |          |
| C   | -0.94284 | -1.54288 | 4.38723  |          |
| H   | -1.56764 | -1.88732 | 5.21878  |          |
| H   | -1.24578 | -0.52490 | 4.12638  |          |
| C   | -0.68405 | -3.92368 | 3.60182  |          |
| H   | 0.34679  | -3.94604 | 3.96636  |          |
| H   | -1.34163 | -4.26641 | 4.40915  |          |
| H   | -0.76283 | -4.63441 | 2.77582  |          |
| C   | -0.40711 | -3.51147 | -3.82960 |          |
| H   | 0.42439  | -4.16420 | -3.54945 |          |
| H   | -1.04241 | -4.04417 | -4.54600 |          |
| H   | 0.00283  | -2.63129 | -4.33829 |          |
| C   | -2.42370 | -2.21677 | -3.03511 |          |
| H   | -3.07449 | -2.79050 | -3.70566 |          |
| H   | -3.02245 | -1.87170 | -2.18927 |          |
| H   | -2.07077 | -1.33480 | -3.57824 |          |
| C   | 3.57027  | -0.84858 | -4.31034 |          |
| H   | 2.53562  | -0.90936 | -4.66618 |          |
| H   | 4.20099  | -0.56938 | -5.16191 |          |

|   |          |          |          |   |          |          |          |
|---|----------|----------|----------|---|----------|----------|----------|
| H | -3.55162 | -1.64059 | 4.21120  | H | 3.87253  | -1.84030 | -3.96394 |
| C | -3.15871 | 1.77090  | 3.62768  | C | 3.25158  | 1.57643  | -3.71095 |
| H | -3.34089 | 2.46974  | 2.80789  | H | 3.34369  | 2.35649  | -2.95130 |
| H | -3.74584 | 2.09884  | 4.49353  | H | 3.86682  | 1.86497  | -4.57115 |
| H | -2.09947 | 1.82948  | 3.89395  | H | 2.20793  | 1.54427  | -4.03682 |
| C | -5.07830 | 0.24864  | 2.89256  | C | 5.21263  | 0.25058  | -2.74134 |
| H | -5.62960 | 0.61432  | 3.76723  | H | 5.78909  | 0.59020  | -3.61016 |
| H | -5.33419 | -0.80833 | 2.77053  | H | 5.52883  | -0.77492 | -2.52699 |
| C | -5.47811 | 0.42639  | -2.13250 | C | 5.36368  | 0.77769  | 2.27164  |
| H | -6.15898 | 0.85153  | -2.87955 | H | 5.98578  | 1.29175  | 3.01407  |
| H | -5.71974 | -0.63734 | -2.04561 | H | 5.68010  | -0.26971 | 2.25726  |
| C | 1.99477  | -4.18767 | 2.04014  | C | -1.75229 | -4.40750 | -1.89532 |
| H | 2.55956  | -4.71043 | 2.82094  | H | -2.26839 | -4.99506 | -2.66360 |
| H | 1.13158  | -4.81713 | 1.79766  | H | -0.87417 | -4.98644 | -1.58904 |
| C | -5.50540 | 1.01570  | 1.65535  | C | 5.51518  | 1.12965  | -1.54279 |
| C | -6.00231 | 2.32678  | 1.72738  | C | 5.90312  | 2.47191  | -1.68157 |
| C | -5.39215 | 0.41682  | 0.39219  | C | 5.39333  | 0.60469  | -0.24789 |
| C | -6.35227 | 3.01479  | 0.56027  | C | 6.14053  | 3.25957  | -0.54948 |
| H | -6.12577 | 2.80782  | 2.69649  | H | 6.03299  | 2.90032  | -2.67419 |
| C | -5.69777 | 1.10231  | -0.79252 | C | 5.58712  | 1.38668  | 0.90033  |
| H | -5.04652 | -0.61054 | 0.32951  | H | 5.13094  | -0.44258 | -0.12892 |
| C | -6.19082 | 2.41278  | -0.69249 | C | 5.97370  | 2.72592  | 0.73325  |
| H | -6.75235 | 4.02485  | 0.62722  | H | 6.45990  | 4.29344  | -0.66774 |
| H | -6.45916 | 2.96166  | -1.59376 | H | 6.15668  | 3.35081  | 1.60593  |
| C | 2.87685  | -4.02319 | 0.81471  | C | -2.68376 | -4.21082 | -0.71192 |
| C | 2.33578  | -3.52157 | -0.37884 | C | -2.21047 | -3.60455 | 0.46132  |
| C | 4.24084  | -4.34000 | 0.84399  | C | -4.02876 | -4.59875 | -0.76294 |
| C | 3.11537  | -3.26575 | -1.51214 | C | -3.04097 | -3.31172 | 1.54874  |
| H | 1.27186  | -3.33246 | -0.40314 | H | -1.15897 | -3.35999 | 0.50650  |
| C | 5.03124  | -4.14737 | -0.29573 | C | -4.86680 | -4.37127 | 0.33566  |
| H | 4.68876  | -4.73410 | 1.75508  | H | -4.42489 | -5.07466 | -1.65883 |
| C | 4.47772  | -3.60617 | -1.45827 | C | -4.38213 | -3.72424 | 1.47479  |
| H | 6.08863  | -4.40406 | -0.27035 | H | -5.90917 | -4.68155 | 0.29413  |
| H | 5.11278  | -3.42911 | -2.32525 | H | -5.05632 | -3.51911 | 2.30516  |
| H | -0.21181 | -1.83724 | -4.69199 | H | 0.09556  | -1.51709 | 4.73671  |
| C | 2.58444  | -2.53108 | -2.73652 | C | -2.58926 | -2.46612 | 2.73270  |
| H | 3.15809  | -2.85552 | -3.61363 | H | -3.18664 | -2.74663 | 3.60903  |
| H | 2.81719  | -1.46807 | -2.60260 | H | -2.85431 | -1.42558 | 2.51106  |
| N | 0.96402  | 2.24043  | 1.49222  | N | -0.71235 | 2.01139  | -1.72895 |
| N | 1.89798  | 1.83682  | 2.06330  | N | -0.65125 | 1.91476  | -2.84995 |
| C | 0.71018  | 2.25811  | 0.12691  | C | -0.72953 | 2.04877  | -0.36877 |
| C | 1.89481  | 1.74014  | -0.48705 | C | -1.99827 | 1.58238  | 0.19015  |
| N | 2.85670  | 1.36398  | 0.30783  | N | -3.00687 | 1.30380  | -0.56266 |
| H | 1.96956  | 1.65880  | -1.56967 | H | -2.02517 | 1.48719  | 1.28019  |
| C | -1.31173 | 3.70805  | 0.36800  | C | 1.30667  | 3.53712  | -0.26437 |
| C | -2.18887 | 4.67295  | -0.12838 | C | 1.98789  | 4.63595  | 0.26014  |
| C | -0.26315 | 3.21904  | -0.43035 | C | 0.03925  | 3.18618  | 0.23094  |
| H | -2.99510 | 5.03838  | 0.50371  | H | 2.96786  | 4.89375  | -0.13473 |
| C | -2.04421 | 5.16031  | -1.43252 | C | 1.42961  | 5.38492  | 1.30279  |
| C | -0.12611 | 3.70715  | -1.74183 | C | -0.52284 | 3.94547  | 1.27144  |
| H | -2.72916 | 5.91215  | -1.81787 | H | 1.96696  | 6.23553  | 1.71603  |
| H | 0.67779  | 3.35353  | -2.38293 | H | -1.51127 | 3.71142  | 1.65802  |
| C | -1.01225 | 4.66636  | -2.23727 | C | 0.17710  | 5.02845  | 1.81189  |
| H | -0.88772 | 5.03434  | -3.25339 | H | -0.26946 | 5.60350  | 2.62002  |
| H | -1.44349 | 3.32197  | 1.37459  | H | 1.76996  | 2.93663  | -1.04191 |
| S | 4.34856  | 0.77225  | -0.29903 | S | -4.41249 | 0.73639  | 0.24260  |
| O | 4.22835  | 0.60795  | -1.75589 | O | -4.20473 | 0.69693  | 1.70299  |
| O | 4.72743  | -0.34561 | 0.55933  | O | -4.83647 | -0.46851 | -0.47430 |
| C | 5.44180  | 2.15281  | 0.03563  | C | -5.55752 | 2.06640  | -0.13074 |
| C | 5.70930  | 3.07919  | -0.97488 | C | -5.84976 | 3.01956  | 0.84700  |
| C | 6.01854  | 2.27273  | 1.30467  | C | -6.14937 | 2.12202  | -1.39761 |
| C | 6.56574  | 4.14872  | -0.70063 | C | -6.74535 | 4.04900  | 0.54313  |
| C | 6.86880  | 3.34910  | 1.55837  | C | -7.03828 | 3.15874  | -1.68246 |
| C | 7.15638  | 4.30161  | 0.56425  | C | -7.35080 | 4.13632  | -0.72065 |
| H | 5.26743  | 2.95872  | -1.96022 | H | -5.39454 | 2.94942  | 1.83115  |
| H | 5.81079  | 1.53374  | 2.07375  | H | -5.92284 | 1.36337  | -2.14194 |
| H | 6.77978  | 4.87063  | -1.48619 | H | -6.97812 | 4.79104  | 1.30444  |

|     |          |          |          |    |          |          |          |
|-----|----------|----------|----------|----|----------|----------|----------|
| H   | 7.31907  | 3.44729  | 2.54446  | H  | -7.49914 | 3.20648  | -2.66747 |
| C   | 8.10394  | 5.44465  | 0.84805  | C  | -8.33959 | 5.23570  | -1.03608 |
| H   | 7.93372  | 5.86539  | 1.84424  | H  | -8.20231 | 5.61605  | -2.05341 |
| H   | 9.14510  | 5.10097  | 0.81364  | H  | -9.36881 | 4.86288  | -0.96433 |
| H   | 7.99629  | 6.24814  | 0.11402  | H  | -8.24276 | 6.07475  | -0.34126 |
| TS2 |          |          |          | M2 |          |          |          |
| C   | 0.22068  | -2.31515 | 1.69503  | C  | 0.03500  | 2.36663  | -1.72105 |
| O   | 0.50684  | -1.10330 | 1.40416  | O  | 0.45558  | 1.20918  | -1.37487 |
| O   | -0.78366 | -2.95632 | 1.24510  | O  | -1.03367 | 2.91484  | -1.29943 |
| Rh  | -2.08750 | -2.05747 | -0.12052 | Rh | -2.25782 | 1.92763  | 0.07475  |
| Rh  | -0.66381 | -0.07328 | 0.01314  | Rh | -0.61904 | 0.08716  | 0.02506  |
| C   | -2.87248 | -0.13520 | 1.96479  | C  | -2.77419 | -0.11986 | -1.97551 |
| O   | -1.88811 | 0.58548  | 1.57644  | O  | -1.73354 | -0.72707 | -1.54138 |
| O   | -3.18880 | -1.26332 | 1.47567  | O  | -3.22496 | 0.97698  | -1.52399 |
| C   | 0.12737  | -2.05254 | -2.03600 | C  | -0.08243 | 2.21371  | 2.01775  |
| O   | 0.45035  | -0.90794 | -1.56346 | O  | 0.36503  | 1.09048  | 1.59024  |
| O   | -0.89187 | -2.72665 | -1.68348 | O  | -1.16175 | 2.76303  | 1.64009  |
| C   | -2.95442 | 0.14869  | -1.83937 | C  | -2.92637 | -0.31839 | 1.83787  |
| O   | -1.95263 | 0.80125  | -1.39220 | O  | -1.84802 | -0.87125 | 1.42832  |
| O   | -3.27113 | -1.03860 | -1.50527 | O  | -3.35858 | 0.81717  | 1.46860  |
| C   | 1.14604  | -3.06783 | 2.67335  | C  | 0.87844  | 3.16937  | -2.73295 |
| C   | 1.04563  | -2.64703 | -3.12307 | C  | 0.76448  | 2.92922  | 3.08946  |
| C   | -3.85907 | 0.84084  | -2.87950 | C  | -3.77230 | -1.08770 | 2.87340  |
| C   | -3.74031 | 0.39452  | 3.12407  | C  | -3.53828 | -0.76557 | -3.14870 |
| C   | -3.79191 | 0.00905  | -4.18232 | C  | -3.85467 | -0.21641 | 4.14882  |
| H   | -4.11329 | -1.02220 | -4.01259 | H  | -4.28429 | 0.76503  | 3.93163  |
| H   | -4.44235 | 0.45634  | -4.94274 | H  | -4.48055 | -0.71365 | 4.89870  |
| H   | -2.77253 | -0.01020 | -4.58426 | H  | -2.86151 | -0.06759 | 4.58774  |
| C   | -3.38484 | 2.27545  | -3.16137 | C  | -3.13514 | -2.44382 | 3.21902  |
| H   | -4.02990 | 2.73177  | -3.92175 | H  | -3.74622 | -2.95384 | 3.97317  |
| H   | -3.41445 | 2.89866  | -2.26526 | H  | -3.05462 | -3.09442 | 2.34522  |
| H   | -2.35724 | 2.28353  | -3.53555 | H  | -2.12925 | -2.31237 | 3.62789  |
| C   | 0.90196  | -1.73593 | -4.36837 | C  | 0.63273  | 2.08912  | 4.38561  |
| H   | 1.52292  | -2.12175 | -5.18463 | H  | 1.21237  | 2.55457  | 5.19065  |
| H   | 1.21755  | -0.71168 | -4.14972 | H  | 1.00258  | 1.06980  | 4.23919  |
| C   | 0.61415  | -4.07868 | -3.48723 | C  | 0.23705  | 4.35113  | 3.35384  |
| H   | -0.41690 | -4.10330 | -3.85081 | H  | -0.80439 | 4.33201  | 3.68591  |
| H   | 1.26807  | -4.46152 | -4.27949 | H  | 0.84119  | 4.81919  | 4.13967  |
| H   | 0.68410  | -4.75656 | -2.63331 | H  | 0.29275  | 4.98212  | 2.46384  |
| C   | 0.28849  | -3.44365 | 3.90613  | C  | -0.03927 | 3.50993  | -3.93103 |
| H   | -0.54765 | -4.09127 | 3.62837  | H  | -0.90014 | 4.10677  | -3.61846 |
| H   | 0.90816  | -3.96925 | 4.64137  | H  | 0.52661  | 4.07596  | -4.67954 |
| H   | -0.11752 | -2.54861 | 4.39171  | H  | -0.41118 | 2.59868  | -4.41333 |
| C   | 2.33135  | -2.19209 | 3.11131  | C  | 2.08972  | 2.35935  | -3.22184 |
| H   | 2.96737  | -2.76170 | 3.79945  | H  | 2.66246  | 2.95955  | -3.93895 |
| H   | 2.94411  | -1.86962 | 2.26671  | H  | 2.75830  | 2.07267  | -2.40826 |
| H   | 1.98445  | -1.29642 | 3.63604  | H  | 1.77122  | 1.44212  | -3.72639 |
| C   | -3.62465 | -0.61594 | 4.29001  | C  | -3.52349 | 0.23964  | -4.32437 |
| H   | -2.59306 | -0.68124 | 4.65393  | H  | -2.49988 | 0.42756  | -4.66768 |
| H   | -4.25456 | -0.29189 | 5.12630  | H  | -4.08996 | -0.16881 | -5.16909 |
| H   | -3.94304 | -1.61507 | 3.98129  | H  | -3.96933 | 1.19509  | -4.03576 |
| C   | -3.26442 | 1.77819  | 3.59595  | C  | -2.87619 | -2.08140 | -3.59024 |
| H   | -3.32052 | 2.52484  | 2.80008  | H  | -2.86514 | -2.82370 | -2.78860 |
| H   | -3.89382 | 2.11748  | 4.42702  | H  | -3.42868 | -2.50246 | -4.43850 |
| H   | -2.23015 | 1.74111  | 3.94935  | H  | -1.84202 | -1.91620 | -3.90505 |
| C   | -5.23646 | 0.44390  | 2.66423  | C  | -5.02665 | -0.99937 | -2.72170 |
| H   | -5.81627 | 0.81774  | 3.51670  | H  | -5.53083 | -1.46574 | -3.57659 |
| H   | -5.56367 | -0.58373 | 2.47902  | H  | -5.48941 | -0.01934 | -2.57080 |
| C   | -5.33834 | 0.82849  | -2.36570 | C  | -5.22239 | -1.27391 | 2.31261  |
| H   | -5.94273 | 1.33338  | -3.12887 | H  | -5.78566 | -1.83048 | 3.07122  |
| H   | -5.67142 | -0.21317 | -2.32884 | H  | -5.68053 | -0.28319 | 2.23476  |
| C   | 1.64630  | -4.39417 | 2.00745  | C  | 1.33249  | 4.51547  | -2.07069 |
| H   | 2.14652  | -4.97211 | 2.79348  | H  | 1.79971  | 5.11271  | -2.86255 |
| H   | 0.76496  | -4.96869 | 1.70204  | H  | 0.43266  | 5.05344  | -1.75304 |
| C   | -5.52001 | 1.28938  | 1.43677  | C  | -5.22925 | -1.84492 | -1.47878 |
| C   | -5.90684 | 2.63575  | 1.53367  | C  | -5.43173 | -3.23269 | -1.54790 |
| C   | -5.38602 | 0.72747  | 0.15850  | C  | -5.20761 | -1.23982 | -0.21329 |

|     |          |          |          |    |          |          |          |
|-----|----------|----------|----------|----|----------|----------|----------|
| C   | -6.13426 | 3.39086  | 0.37753  | C  | -5.58987 | -3.98409 | -0.37782 |
| H   | -6.04436 | 3.09218  | 2.51266  | H  | -5.48134 | -3.72599 | -2.51734 |
| C   | -5.57017 | 1.47627  | -1.01354 | C  | -5.32519 | -1.97894 | 0.97346  |
| H   | -5.12328 | -0.32273 | 0.07269  | H  | -5.08928 | -0.16191 | -0.14972 |
| C   | -5.95753 | 2.82002  | -0.88803 | C  | -5.52694 | -3.36506 | 0.87578  |
| H   | -6.45403 | 4.42785  | 0.46314  | H  | -5.76867 | -5.05584 | -0.44363 |
| H   | -6.13424 | 3.41931  | -1.77990 | H  | -5.64953 | -3.96039 | 1.77919  |
| C   | 2.59260  | -4.23262 | 0.83062  | C  | 2.29614  | 4.38354  | -0.90611 |
| C   | 2.13270  | -3.66109 | -0.36520 | C  | 1.83753  | 3.89677  | 0.32862  |
| C   | 3.93586  | -4.62218 | 0.90721  | C  | 3.65359  | 4.70249  | -1.03497 |
| C   | 2.97346  | -3.41051 | -1.45531 | C  | 2.69653  | 3.65897  | 1.40727  |
| H   | 1.08197  | -3.41568 | -0.42747 | H  | 0.77641  | 3.70299  | 0.42384  |
| C   | 4.78502  | -4.43361 | -0.19036 | C  | 4.52275  | 4.52471  | 0.04849  |
| H   | 4.32174  | -5.07043 | 1.82167  | H  | 4.03563  | 5.08355  | -1.98072 |
| C   | 4.31228  | -3.82593 | -1.35590 | C  | 4.05191  | 3.99803  | 1.25248  |
| H   | 5.82592  | -4.74554 | -0.12869 | H  | 5.57593  | 4.77861  | -0.05477 |
| H   | 4.99389  | -3.65308 | -2.18759 | H  | 4.74687  | 3.82803  | 2.07370  |
| H   | -0.13580 | -1.71102 | -4.71981 | H  | -0.41155 | 2.03425  | 4.71285  |
| C   | 2.53431  | -2.60935 | -2.67421 | C  | 2.26411  | 2.95135  | 2.68585  |
| H   | 3.13027  | -2.93318 | -3.53660 | H  | 2.81212  | 3.38746  | 3.53060  |
| H   | 2.81321  | -1.56443 | -2.49436 | H  | 2.60997  | 1.91337  | 2.61091  |
| N   | 0.85012  | 1.83085  | 1.89128  | C  | 0.73894  | -1.45797 | 0.13360  |
| N   | 0.57134  | 1.78716  | 2.96523  | C  | 2.10177  | -0.96417 | 0.24285  |
| C   | 0.62968  | 1.73395  | 0.13338  | N  | 3.00544  | -1.33909 | -0.60354 |
| C   | 1.97028  | 1.35083  | -0.29267 | H  | 2.29132  | -0.20218 | 1.01056  |
| N   | 2.98333  | 1.25932  | 0.49715  | C  | -0.85445 | -3.34292 | -0.04431 |
| H   | 2.02392  | 1.08897  | -1.35765 | C  | -1.13292 | -4.70154 | 0.03480  |
| C   | -1.22037 | 3.42213  | 0.01959  | C  | 0.45424  | -2.85266 | 0.23896  |
| C   | -1.69754 | 4.68434  | -0.32926 | H  | -2.13207 | -5.06359 | -0.19424 |
| C   | 0.11831  | 3.06878  | -0.24943 | C  | -0.12858 | -5.60285 | 0.41646  |
| H   | -2.72902 | 4.94908  | -0.10925 | C  | 1.45926  | -3.79351 | 0.62359  |
| C   | -0.85950 | 5.60185  | -0.97626 | H  | -0.35351 | -6.66551 | 0.48472  |
| C   | 0.95988  | 4.01017  | -0.88220 | H  | 2.46248  | -3.44743 | 0.84789  |
| H   | -1.23963 | 6.58167  | -1.25789 | C  | 1.16635  | -5.14665 | 0.71436  |
| H   | 2.00075  | 3.76628  | -1.07922 | H  | 1.93686  | -5.85319 | 1.01302  |
| C   | 0.46867  | 5.26001  | -1.25972 | H  | -1.62340 | -2.64240 | -0.34043 |
| H   | 1.12212  | 5.97127  | -1.75947 | S  | 4.53608  | -0.54931 | -0.42975 |
| H   | -1.87350 | 2.70448  | 0.50321  | O  | 4.59489  | 0.21627  | 0.82866  |
| S   | 4.42598  | 0.62855  | -0.20886 | O  | 4.81672  | 0.10806  | -1.71038 |
| O   | 4.26290  | 0.44966  | -1.66418 | C  | 5.59072  | -1.99200 | -0.26935 |
| O   | 4.83052  | -0.49954 | 0.63441  | C  | 6.04675  | -2.37510 | 0.99400  |
| C   | 5.55057  | 1.99765  | 0.07172  | C  | 5.94752  | -2.70807 | -1.41748 |
| C   | 5.85437  | 2.86604  | -0.97883 | C  | 6.87029  | -3.49938 | 1.10418  |
| C   | 6.11748  | 2.16624  | 1.33976  | C  | 6.76799  | -3.82850 | -1.28641 |
| C   | 6.73578  | 3.92614  | -0.74738 | C  | 7.24232  | -4.24183 | -0.02822 |
| C   | 6.99240  | 3.23195  | 1.55154  | H  | 5.77321  | -1.79623 | 1.87205  |
| C   | 7.31607  | 4.12649  | 0.51538  | H  | 5.59411  | -2.38880 | -2.39424 |
| H   | 5.41939  | 2.70630  | -1.96170 | H  | 7.23197  | -3.79713 | 2.08652  |
| H   | 5.88368  | 1.47057  | 2.14117  | H  | 7.04685  | -4.38842 | -2.17726 |
| H   | 6.97815  | 4.60212  | -1.56509 | C  | 8.15736  | -5.43931 | 0.09206  |
| H   | 7.43411  | 3.36752  | 2.53715  | H  | 8.17303  | -5.83294 | 1.11241  |
| C   | 8.29127  | 5.25681  | 0.75397  | H  | 7.85092  | -6.24575 | -0.58189 |
| H   | 8.13615  | 5.71756  | 1.73482  | H  | 9.18639  | -5.16729 | -0.17346 |
| H   | 9.32411  | 4.88815  | 0.72750  |    |          |          |          |
| H   | 8.19902  | 6.03551  | -0.00850 |    |          |          |          |
| TS3 |          |          |          | M3 |          |          |          |
| C   | -0.91948 | -1.82271 | 2.41462  | C  | -0.99979 | -2.34958 | 2.07242  |
| O   | -0.21241 | -1.08575 | 1.64656  | O  | -0.29611 | -1.36534 | 1.66399  |
| O   | -2.13925 | -2.13165 | 2.22039  | O  | -2.10861 | -2.72118 | 1.56766  |
| Rh  | -3.14178 | -1.43696 | 0.52436  | Rh | -2.92868 | -1.70469 | -0.05149 |
| Rh  | -1.03440 | -0.32697 | -0.12240 | Rh | -0.95888 | -0.25403 | -0.02086 |
| C   | -2.84040 | 1.31238  | 1.53712  | C  | -3.23235 | 0.64548  | 1.66696  |
| O   | -1.70608 | 1.34010  | 0.94545  | O  | -2.04882 | 0.96691  | 1.31228  |
| O   | -3.63450 | 0.32221  | 1.55423  | O  | -3.85622 | -0.39414 | 1.28225  |
| C   | -1.35302 | -3.12031 | -1.07155 | C  | -0.69007 | -2.70953 | -1.64221 |
| O   | -0.56179 | -2.11451 | -1.12837 | O  | -0.04707 | -1.66044 | -1.29714 |
| O   | -2.49740 | -3.12042 | -0.52339 | O  | -1.90342 | -2.95633 | -1.34275 |

|   |          |          |          |   |          |          |          |
|---|----------|----------|----------|---|----------|----------|----------|
| C | -3.28369 | 0.01730  | -2.01806 | C | -2.92430 | 0.35112  | -2.13065 |
| O | -2.05843 | 0.32935  | -1.83238 | O | -1.79176 | 0.71090  | -1.66958 |
| O | -3.99218 | -0.69167 | -1.23626 | O | -3.62924 | -0.61266 | -1.68541 |
| C | -0.25461 | -2.38615 | 3.68835  | C | -0.50904 | -3.18291 | 3.27826  |
| C | -0.86838 | -4.42026 | -1.74515 | C | 0.04981  | -3.75363 | -2.50253 |
| C | -3.96653 | 0.52910  | -3.30384 | C | -3.49125 | 1.13272  | -3.33257 |
| C | -3.27705 | 2.57641  | 2.30690  | C | -3.97796 | 1.57040  | 2.65248  |
| C | -4.38798 | -0.70920 | -4.12984 | C | -3.58944 | 0.14796  | -4.52173 |
| H | -5.05610 | -1.35879 | -3.55803 | H | -4.22779 | -0.70644 | -4.27994 |
| H | -4.90674 | -0.38965 | -5.04097 | H | -4.00954 | 0.66073  | -5.39476 |
| H | -3.51309 | -1.29619 | -4.43195 | H | -2.59974 | -0.23072 | -4.80105 |
| C | -3.01197 | 1.40049  | -4.13613 | C | -2.57413 | 2.30713  | -3.71045 |
| H | -3.51981 | 1.72885  | -5.05093 | H | -2.99922 | 2.84050  | -4.56930 |
| H | -2.68339 | 2.28628  | -3.58820 | H | -2.45273 | 3.01406  | -2.88720 |
| H | -2.11836 | 0.83996  | -4.42499 | H | -1.57781 | 1.95267  | -3.98870 |
| C | -0.89639 | -4.15900 | -3.27296 | C | 0.28492  | -3.09611 | -3.88717 |
| H | -0.55819 | -5.05267 | -3.80958 | H | 0.78535  | -3.80852 | -4.55300 |
| H | -0.24252 | -3.32549 | -3.54621 | H | 0.91253  | -2.20485 | -3.80450 |
| C | -1.80708 | -5.59679 | -1.41995 | C | -0.80264 | -5.02356 | -2.68523 |
| H | -2.83082 | -5.38832 | -1.74199 | H | -1.76274 | -4.79480 | -3.15570 |
| H | -1.45603 | -6.49311 | -1.94438 | H | -0.26269 | -5.72709 | -3.32970 |
| H | -1.83340 | -5.82007 | -0.35082 | H | -1.00805 | -5.52473 | -1.73611 |
| C | -1.12169 | -1.95869 | 4.89551  | C | -1.61041 | -3.12446 | 4.36306  |
| H | -2.14044 | -2.34577 | 4.81101  | H | -2.55343 | -3.53507 | 3.99345  |
| H | -0.67857 | -2.33830 | 5.82333  | H | -1.29794 | -3.70093 | 5.24136  |
| H | -1.17745 | -0.86676 | 4.97379  | H | -1.79215 | -2.09318 | 4.68761  |
| C | 1.17317  | -1.84302 | 3.85705  | C | 0.80356  | -2.63119 | 3.85170  |
| H | 1.61546  | -2.25383 | 4.77259  | H | 1.12626  | -3.25061 | 4.69675  |
| H | 1.81637  | -2.11047 | 3.01626  | H | 1.60282  | -2.62963 | 3.10743  |
| H | 1.16627  | -0.75219 | 3.94162  | H | 0.66498  | -1.60901 | 4.21885  |
| C | -3.40656 | 2.18747  | 3.79874  | C | -4.27023 | 0.74848  | 3.93031  |
| H | -2.44002 | 1.87275  | 4.20817  | H | -3.34020 | 0.43321  | 4.41730  |
| H | -3.75051 | 3.05129  | 4.37922  | H | -4.83191 | 1.35978  | 4.64600  |
| H | -4.11976 | 1.37005  | 3.93497  | H | -4.85606 | -0.14558 | 3.70118  |
| C | -2.24516 | 3.70647  | 2.15965  | C | -3.13390 | 2.80126  | 3.01958  |
| H | -2.13103 | 4.02263  | 1.11984  | H | -2.93056 | 3.43129  | 2.15066  |
| H | -2.56850 | 4.57521  | 2.74550  | H | -3.67182 | 3.40750  | 3.75801  |
| H | -1.26170 | 3.39580  | 2.52195  | H | -2.17434 | 2.50769  | 3.45487  |
| C | -4.68482 | 3.03095  | 1.79508  | C | -5.34652 | 1.99912  | 2.02303  |
| H | -4.95931 | 3.92120  | 2.37378  | H | -5.83832 | 2.65473  | 2.75193  |
| H | -5.40404 | 2.24684  | 2.05066  | H | -5.96597 | 1.10200  | 1.92795  |
| C | -5.25982 | 1.32354  | -2.91867 | C | -4.93586 | 1.63178  | -2.99263 |
| H | -5.71086 | 1.66758  | -3.85722 | H | -5.29930 | 2.17052  | -3.87612 |
| H | -5.96234 | 0.61894  | -2.46316 | H | -5.57385 | 0.75135  | -2.86823 |
| C | -0.25635 | -3.95196 | 3.61795  | C | -0.33922 | -4.67714 | 2.83808  |
| H | 0.09175  | -4.31218 | 4.59332  | H | -0.12799 | -5.25334 | 3.74680  |
| H | -1.29557 | -4.27985 | 3.50738  | H | -1.30570 | -5.02257 | 2.45670  |
| C | -4.77701 | 3.33278  | 0.31127  | C | -5.26396 | 2.69495  | 0.67718  |
| C | -4.60541 | 4.63110  | -0.19536 | C | -5.23353 | 4.09409  | 0.56303  |
| C | -5.02786 | 2.29376  | -0.59720 | C | -5.20603 | 1.93176  | -0.49836 |
| C | -4.66705 | 4.86698  | -1.57344 | C | -5.12767 | 4.69849  | -0.69479 |
| H | -4.43537 | 5.46165  | 0.48793  | H | -5.30545 | 4.71344  | 1.45591  |
| C | -5.05548 | 2.50110  | -1.98444 | C | -5.06106 | 2.51561  | -1.76566 |
| H | -5.19651 | 1.29181  | -0.21393 | H | -5.26815 | 0.85037  | -0.42463 |
| C | -4.87974 | 3.80878  | -2.46434 | C | -5.03073 | 3.91643  | -1.85102 |
| H | -4.55231 | 5.88029  | -1.95423 | H | -5.12213 | 5.78412  | -0.77439 |
| H | -4.92098 | 4.00317  | -3.53495 | H | -4.94034 | 4.39831  | -2.82316 |
| C | 0.60072  | -4.55515 | 2.52158  | C | 0.74762  | -4.93576 | 1.81209  |
| C | 0.16241  | -4.50885 | 1.18787  | C | 0.54827  | -4.55719 | 0.47414  |
| C | 1.85194  | -5.12097 | 2.79477  | C | 1.97359  | -5.51059 | 2.16957  |
| C | 0.95779  | -4.94471 | 0.12244  | C | 1.55077  | -4.67042 | -0.49547 |
| H | -0.82808 | -4.11106 | 1.00272  | H | -0.42438 | -4.16391 | 0.20635  |
| C | 2.64562  | -5.60811 | 1.74873  | C | 2.97443  | -5.68364 | 1.20422  |
| H | 2.21315  | -5.17421 | 3.82071  | H | 2.14946  | -5.82384 | 3.19777  |
| C | 2.20839  | -5.51057 | 0.42702  | C | 2.77042  | -5.25599 | -0.10899 |
| H | 3.61815  | -6.04601 | 1.96505  | H | 3.92280  | -6.13974 | 1.48264  |
| H | 2.85346  | -5.85394 | -0.38023 | H | 3.57041  | -5.35989 | -0.84031 |

|     |          |          |          |   |          |          |          |
|-----|----------|----------|----------|---|----------|----------|----------|
| H   | -1.91226 | -3.92790 | -3.61260 | H | -0.66745 | -2.81638 | -4.35234 |
| C   | 0.59708  | -4.73986 | -1.34381 | C | 1.43905  | -4.09673 | -1.90164 |
| H   | 0.88973  | -5.63637 | -1.90550 | H | 1.92035  | -4.79239 | -2.60103 |
| H   | 1.24014  | -3.93410 | -1.71570 | H | 2.05661  | -3.19459 | -1.91974 |
| C   | 0.73503  | 0.57616  | -0.81592 | C | 0.89970  | 1.33574  | -0.15916 |
| C   | 1.82462  | -0.38813 | -0.91653 | C | 1.77742  | 0.61345  | -1.04920 |
| N   | 2.99342  | -0.22003 | -0.39110 | N | 2.92589  | 0.09127  | -0.72374 |
| H   | 1.55873  | -1.31364 | -1.44727 | H | 1.40659  | 0.54702  | -2.07786 |
| C   | -0.25644 | 2.74307  | -1.51953 | C | -0.65260 | 3.35723  | -0.13544 |
| C   | -0.20301 | 3.91761  | -2.26102 | C | -1.02211 | 4.62148  | -0.59868 |
| C   | 0.79294  | 1.78744  | -1.59842 | C | 0.44636  | 2.67587  | -0.69133 |
| H   | -1.00879 | 4.64334  | -2.18145 | H | -1.88340 | 5.11943  | -0.15916 |
| C   | 0.88079  | 4.16349  | -3.11625 | C | -0.31430 | 5.23238  | -1.63979 |
| C   | 1.88655  | 2.06239  | -2.46804 | C | 1.16265  | 3.31182  | -1.72660 |
| H   | 0.91329  | 5.08013  | -3.70189 | H | -0.61062 | 6.21297  | -2.00644 |
| H   | 2.70427  | 1.35313  | -2.54902 | H | 2.03815  | 2.83494  | -2.16021 |
| C   | 1.92304  | 3.23064  | -3.22188 | C | 0.77792  | 4.56740  | -2.20601 |
| H   | 2.75989  | 3.42134  | -3.88980 | H | 1.34271  | 5.03040  | -3.01272 |
| H   | -1.09147 | 2.55094  | -0.85829 | H | -1.23417 | 2.88028  | 0.64440  |
| S   | 4.07724  | -1.55257 | -0.55423 | S | 3.78770  | -0.67631 | -1.97037 |
| O   | 3.51673  | -2.60738 | -1.41748 | O | 3.09492  | -0.56711 | -3.26912 |
| O   | 4.52524  | -1.86878 | 0.80850  | O | 4.18341  | -2.00051 | -1.46978 |
| C   | 5.42616  | -0.75844 | -1.43444 | C | 5.26093  | 0.35373  | -2.03325 |
| C   | 5.53290  | -0.91686 | -2.81861 | C | 5.37405  | 1.34238  | -3.01394 |
| C   | 6.35684  | 0.00279  | -0.71945 | C | 6.28239  | 0.14300  | -1.10154 |
| C   | 6.58514  | -0.29160 | -3.49314 | C | 6.52475  | 2.13473  | -3.05032 |
| C   | 7.39949  | 0.62136  | -1.41111 | C | 7.42346  | 0.94642  | -1.15128 |
| C   | 7.53109  | 0.48566  | -2.80453 | C | 7.56403  | 1.95251  | -2.12296 |
| H   | 4.81303  | -1.52886 | -3.35551 | H | 4.58186  | 1.47745  | -3.74556 |
| H   | 6.27398  | 0.09711  | 0.35991  | H | 6.19107  | -0.64637 | -0.36009 |
| H   | 6.67286  | -0.41716 | -4.57068 | H | 6.61610  | 2.90138  | -3.81762 |
| H   | 8.12543  | 1.21358  | -0.85690 | H | 8.21959  | 0.78195  | -0.42730 |
| C   | 8.68518  | 1.13293  | -3.53587 | C | 8.82076  | 2.79077  | -2.19176 |
| H   | 8.45455  | 1.28811  | -4.59386 | H | 8.62206  | 3.77833  | -2.61881 |
| H   | 8.94535  | 2.10064  | -3.09581 | H | 9.26550  | 2.92875  | -1.20146 |
| H   | 9.57947  | 0.49971  | -3.48298 | H | 9.57470  | 2.30560  | -2.82414 |
| C   | 3.62945  | 3.82913  | 2.07710  | C | 3.78243  | 2.30599  | 3.10762  |
| C   | 3.25819  | 4.28971  | 3.35318  | C | 3.37292  | 2.18856  | 4.45085  |
| C   | 4.39311  | 4.67328  | 1.25380  | C | 4.72115  | 3.30225  | 2.76989  |
| C   | 3.64905  | 5.55571  | 3.79324  | C | 3.89113  | 3.04336  | 5.42559  |
| C   | 4.78607  | 5.94217  | 1.69386  | C | 5.23903  | 4.15347  | 3.74619  |
| C   | 4.41636  | 6.38777  | 2.96661  | C | 4.82451  | 4.02771  | 5.07821  |
| H   | 2.64590  | 3.66607  | 4.00074  | H | 2.65248  | 1.43003  | 4.74676  |
| H   | 4.68282  | 4.33390  | 0.26069  | H | 5.04439  | 3.40417  | 1.73565  |
| H   | 3.35284  | 5.89741  | 4.78280  | H | 3.56863  | 2.93992  | 6.45907  |
| H   | 5.37863  | 6.58082  | 1.04214  | H | 5.96492  | 4.91480  | 3.47008  |
| H   | 4.71845  | 7.37406  | 3.31210  | H | 5.22680  | 4.69093  | 5.84059  |
| C   | 3.25993  | 2.47586  | 1.56841  | C | 3.28691  | 1.42241  | 2.03980  |
| C   | 3.02852  | 1.30352  | 2.44859  | C | 2.41484  | 0.24332  | 2.23139  |
| S   | 1.48112  | 1.90274  | 1.67073  | S | 1.34859  | 1.58264  | 1.58188  |
| H   | 3.67561  | 2.22941  | 0.59411  | H | 3.83434  | 1.42479  | 1.10213  |
| H   | 3.08056  | 1.44482  | 3.52598  | H | 2.11129  | -0.04403 | 3.23272  |
| H   | 3.35758  | 0.33253  | 2.08820  | H | 2.54062  | -0.58172 | 1.53908  |
| TS4 |          |          |          | P |          |          |          |
| C   | 0.12943  | 2.52267  | 1.62902  | C | -2.77507 | 0.39050  | -0.06153 |
| O   | -0.23873 | 1.34894  | 1.29433  | C | -1.64029 | -0.30109 | 0.17515  |
| O   | 1.25654  | 3.04864  | 1.34535  | N | -0.33421 | 0.20799  | 0.39175  |
| Rh  | 2.56251  | 2.02266  | 0.10244  | H | -1.68919 | -1.38253 | 0.22508  |
| Rh  | 0.98044  | 0.20499  | 0.04189  | C | -5.27255 | 0.27141  | 0.16708  |
| C   | 2.96394  | 0.01784  | 2.20198  | C | -6.49406 | -0.37892 | -0.02555 |
| O   | 1.96755  | -0.59743 | 1.70056  | C | -4.06893 | -0.29285 | -0.29990 |
| O   | 3.43064  | 1.12743  | 1.77649  | H | -7.40826 | 0.07394  | 0.35250  |
| C   | 0.61777  | 2.21990  | -2.06875 | C | -6.54412 | -1.60771 | -0.69387 |
| O   | 0.11861  | 1.13241  | -1.61987 | C | -4.13635 | -1.52121 | -0.98735 |
| O   | 1.62702  | 2.81791  | -1.56842 | H | -7.49559 | -2.11254 | -0.84577 |
| C   | 3.41308  | -0.21737 | -1.56158 | H | -3.23080 | -1.95819 | -1.40118 |
| O   | 2.31586  | -0.77659 | -1.24035 | C | -5.35792 | -2.17390 | -1.17455 |

|   |          |          |          |   |          |          |          |
|---|----------|----------|----------|---|----------|----------|----------|
| O | 3.79352  | 0.93619  | -1.16390 | H | -5.38390 | -3.11970 | -1.71196 |
| C | -0.84396 | 3.37927  | 2.46104  | H | -5.25544 | 1.21765  | 0.70390  |
| C | -0.05978 | 2.85070  | -3.30080 | S | 0.59319  | -0.67318 | 1.56946  |
| C | 4.37117  | -0.95454 | -2.51718 | O | -0.21829 | -1.83753 | 1.93993  |
| C | 3.66112  | -0.60231 | 3.42884  | O | 1.04948  | 0.28114  | 2.58595  |
| C | 4.49373  | -0.09973 | -3.80089 | C | 2.03255  | -1.28258 | 0.68811  |
| H | 4.85989  | 0.90594  | -3.57727 | C | 1.87627  | -2.32342 | -0.23512 |
| H | 5.19080  | -0.57755 | -4.49892 | C | 3.29144  | -0.76368 | 0.98707  |
| H | 3.52540  | -0.00891 | -4.30616 | C | 3.00408  | -2.83192 | -0.87602 |
| C | 3.83185  | -2.34676 | -2.87396 | C | 4.41192  | -1.29264 | 0.33866  |
| H | 4.51817  | -2.83584 | -3.57609 | C | 4.28913  | -2.32710 | -0.59958 |
| H | 3.72708  | -2.98135 | -1.99278 | H | 0.89346  | -2.73903 | -0.44127 |
| H | 2.84835  | -2.28007 | -3.34647 | H | 3.39348  | 0.03849  | 1.71131  |
| C | -0.25878 | 1.74763  | -4.36447 | H | 2.88646  | -3.64162 | -1.59415 |
| H | -0.73135 | 2.17532  | -5.25580 | H | 5.39491  | -0.88771 | 0.57005  |
| H | -0.89398 | 0.94213  | -3.98857 | C | 5.50240  | -2.90732 | -1.29026 |
| C | 0.81208  | 3.97845  | -3.87902 | H | 5.67707  | -3.94115 | -0.96929 |
| H | 1.78896  | 3.59899  | -4.19573 | H | 5.36922  | -2.92501 | -2.37757 |
| H | 0.31488  | 4.41115  | -4.75534 | H | 6.40507  | -2.33159 | -1.06816 |
| H | 0.98318  | 4.77563  | -3.15284 | C | 1.37301  | 1.95450  | -0.19159 |
| C | -0.29357 | 3.37947  | 3.91059  | C | 1.83078  | 1.42339  | -1.40793 |
| H | 0.72325  | 3.78144  | 3.95021  | C | 2.19976  | 2.83390  | 0.51983  |
| H | -0.93403 | 3.99590  | 4.55175  | C | 3.09077  | 1.76792  | -1.90278 |
| H | -0.28084 | 2.36471  | 4.32368  | C | 3.46217  | 3.18215  | 0.02564  |
| C | -2.26232 | 2.78096  | 2.46484  | C | 3.91033  | 2.65104  | -1.18836 |
| H | -2.91227 | 3.39880  | 3.09577  | H | 1.20642  | 0.72624  | -1.96306 |
| H | -2.69891 | 2.73918  | 1.46479  | H | 1.86074  | 3.23986  | 1.47101  |
| H | -2.25164 | 1.76505  | 2.86962  | H | 3.43600  | 1.34499  | -2.84379 |
| C | 3.48351  | 0.38252  | 4.60881  | H | 4.09476  | 3.86326  | 0.59097  |
| H | 2.42362  | 0.51827  | 4.85192  | H | 4.89170  | 2.91935  | -1.57390 |
| H | 3.98444  | -0.01101 | 5.50075  | C | -0.03666 | 1.66999  | 0.31420  |
| H | 3.90954  | 1.36203  | 4.37507  | C | -1.03667 | 2.35908  | -0.62856 |
| C | 3.03540  | -1.95901 | 3.79101  | S | -2.77620 | 2.17912  | -0.11483 |
| H | 3.15130  | -2.68696 | 2.98452  | H | -0.15001 | 2.10685  | 1.30999  |
| H | 3.52353  | -2.36049 | 4.68713  | H | -0.93211 | 1.98171  | -1.64935 |
| H | 1.96647  | -1.85899 | 3.99828  | H | -0.81773 | 3.42973  | -0.63535 |
| C | 5.19290  | -0.75036 | 3.14075  |   |          |          |          |
| H | 5.64293  | -1.18311 | 4.04239  |   |          |          |          |
| H | 5.61053  | 0.25447  | 3.02425  |   |          |          |          |
| C | 5.78883  | -1.05284 | -1.85907 |   |          |          |          |
| H | 6.42972  | -1.58555 | -2.57199 |   |          |          |          |
| H | 6.18768  | -0.03797 | -1.76569 |   |          |          |          |
| C | -0.84444 | 4.84453  | 1.95025  |   |          |          |          |
| H | -1.51865 | 5.41048  | 2.60639  |   |          |          |          |
| H | 0.15699  | 5.25624  | 2.12163  |   |          |          |          |
| C | 5.55630  | -1.58927 | 1.93009  |   |          |          |          |
| C | 5.85505  | -2.95713 | 2.03442  |   |          |          |          |
| C | 5.58630  | -0.99948 | 0.65820  |   |          |          |          |
| C | 6.15433  | -3.70466 | 0.88985  |   |          |          |          |
| H | 5.86487  | -3.43801 | 3.01146  |   |          |          |          |
| C | 5.84370  | -1.73763 | -0.50633 |   |          |          |          |
| H | 5.39403  | 0.06539  | 0.57026  |   |          |          |          |
| C | 6.13836  | -3.10379 | -0.37386 |   |          |          |          |
| H | 6.40248  | -4.76041 | 0.98355  |   |          |          |          |
| H | 6.36608  | -3.69801 | -1.25745 |   |          |          |          |
| C | -1.20811 | 5.14204  | 0.49935  |   |          |          |          |
| C | -1.29669 | 4.16669  | -0.49933 |   |          |          |          |
| C | -1.38599 | 6.48569  | 0.12252  |   |          |          |          |
| C | -1.48500 | 4.49203  | -1.85283 |   |          |          |          |
| H | -1.22475 | 3.11473  | -0.24964 |   |          |          |          |
| C | -1.61585 | 6.82970  | -1.21111 |   |          |          |          |
| H | -1.33422 | 7.26819  | 0.87912  |   |          |          |          |
| C | -1.65059 | 5.83849  | -2.20052 |   |          |          |          |
| H | -1.75657 | 7.87411  | -1.48372 |   |          |          |          |
| H | -1.80900 | 6.11533  | -3.24171 |   |          |          |          |
| H | 0.70118  | 1.31487  | -4.66944 |   |          |          |          |
| C | -1.47555 | 3.38954  | -2.89320 |   |          |          |          |



|      |          |          |          |     |          |          |          |
|------|----------|----------|----------|-----|----------|----------|----------|
| H    | -1.94455 | 3.75289  | -3.81567 |     |          |          |          |
| H    | -2.07204 | 2.54522  | -2.53673 |     |          |          |          |
| C    | -0.74527 | -2.16087 | 0.14234  |     |          |          |          |
| C    | -1.74965 | -1.47037 | -0.58056 |     |          |          |          |
| N    | -2.84507 | -1.03151 | 0.03221  |     |          |          |          |
| H    | -1.63462 | -1.38100 | -1.66367 |     |          |          |          |
| C    | 1.26041  | -3.67805 | 0.16742  |     |          |          |          |
| C    | 2.04254  | -4.68482 | -0.39754 |     |          |          |          |
| C    | 0.14273  | -3.15079 | -0.51469 |     |          |          |          |
| H    | 2.89957  | -5.06783 | 0.15219  |     |          |          |          |
| C    | 1.74480  | -5.18494 | -1.67108 |     |          |          |          |
| C    | -0.13363 | -3.65481 | -1.80621 |     |          |          |          |
| H    | 2.35474  | -5.97085 | -2.11144 |     |          |          |          |
| H    | -0.99641 | -3.29797 | -2.36216 |     |          |          |          |
| C    | 0.65939  | -4.65258 | -2.37635 |     |          |          |          |
| H    | 0.41480  | -5.02873 | -3.36779 |     |          |          |          |
| H    | 1.51730  | -3.28047 | 1.14360  |     |          |          |          |
| S    | -3.93517 | -0.22702 | -0.98306 |     |          |          |          |
| O    | -4.31638 | -1.05093 | -2.14869 |     |          |          |          |
| O    | -3.43213 | 1.13473  | -1.23913 |     |          |          |          |
| C    | -5.36472 | -0.09932 | 0.09787  |     |          |          |          |
| C    | -6.62433 | -0.37978 | -0.43229 |     |          |          |          |
| C    | -5.22398 | 0.36929  | 1.40958  |     |          |          |          |
| C    | -7.75803 | -0.19985 | 0.36875  |     |          |          |          |
| C    | -6.36380 | 0.53193  | 2.19690  |     |          |          |          |
| C    | -7.64808 | 0.25541  | 1.69074  |     |          |          |          |
| H    | -6.71381 | -0.74049 | -1.45336 |     |          |          |          |
| H    | -4.23895 | 0.59199  | 1.80827  |     |          |          |          |
| H    | -8.74004 | -0.41827 | -0.04659 |     |          |          |          |
| H    | -6.25501 | 0.88694  | 3.22045  |     |          |          |          |
| C    | -8.87292 | 0.46648  | 2.55210  |     |          |          |          |
| H    | -9.04708 | 1.53523  | 2.72512  |     |          |          |          |
| H    | -9.77090 | 0.05506  | 2.08266  |     |          |          |          |
| H    | -8.75581 | -0.00493 | 3.53399  |     |          |          |          |
| C    | -4.21834 | -3.89452 | 0.26499  |     |          |          |          |
| C    | -3.43350 | -4.81336 | -0.48069 |     |          |          |          |
| C    | -5.59518 | -3.76670 | -0.05674 |     |          |          |          |
| C    | -4.00546 | -5.56152 | -1.50317 |     |          |          |          |
| C    | -6.16545 | -4.53727 | -1.06354 |     |          |          |          |
| C    | -5.37235 | -5.43287 | -1.79486 |     |          |          |          |
| H    | -2.37386 | -4.92532 | -0.27189 |     |          |          |          |
| H    | -6.21035 | -3.07238 | 0.50913  |     |          |          |          |
| H    | -3.39062 | -6.25152 | -2.07613 |     |          |          |          |
| H    | -7.22460 | -4.43883 | -1.28906 |     |          |          |          |
| H    | -5.81599 | -6.02773 | -2.59017 |     |          |          |          |
| C    | -3.68466 | -3.12608 | 1.35234  |     |          |          |          |
| C    | -2.46954 | -3.45935 | 2.06744  |     |          |          |          |
| S    | -0.97402 | -2.20502 | 1.87432  |     |          |          |          |
| H    | -4.33854 | -2.38675 | 1.80502  |     |          |          |          |
| H    | -2.06515 | -4.44216 | 1.83206  |     |          |          |          |
| H    | -2.61264 | -3.34870 | 3.14542  |     |          |          |          |
| TS1' |          |          |          | M1' |          |          |          |
| N    | -1.70623 | -0.24269 | 1.80368  | N   | 2.00508  | -0.92103 | 1.79969  |
| N    | -0.68010 | -0.02728 | 2.32235  | N   | 1.85740  | -1.36817 | 2.83415  |
| C    | -2.15715 | 0.04000  | 0.54743  | C   | 2.15465  | -0.41396 | 0.57861  |
| C    | -1.09573 | 0.69728  | -0.12493 | C   | 1.02238  | -0.56406 | -0.29439 |
| N    | 0.01442  | 0.88686  | 0.54842  | N   | -0.09990 | -1.08367 | 0.10249  |
| H    | -1.20674 | 1.03286  | -1.15500 | H   | 1.17036  | -0.22624 | -1.32549 |
| C    | -4.37389 | -1.03182 | 0.94175  | C   | 4.63105  | -0.12859 | 0.91105  |
| C    | -5.65753 | -1.37758 | 0.51649  | C   | 5.84354  | 0.48028  | 0.58052  |
| C    | -3.50310 | -0.31914 | 0.09434  | C   | 3.44633  | 0.22379  | 0.23737  |
| H    | -6.31346 | -1.92748 | 1.18783  | H   | 6.74820  | 0.19387  | 1.11212  |
| C    | -6.10041 | -1.02207 | -0.76317 | C   | 5.89961  | 1.44088  | -0.43584 |
| C    | -3.95679 | 0.03653  | -1.19041 | C   | 3.50746  | 1.19976  | -0.77551 |
| H    | -7.10042 | -1.29208 | -1.09414 | H   | 6.84548  | 1.90992  | -0.69617 |
| H    | -3.31475 | 0.59195  | -1.87002 | H   | 2.60558  | 1.51391  | -1.29505 |
| C    | -5.24171 | -0.31366 | -1.61142 | C   | 4.72659  | 1.79342  | -1.11225 |

|                                                    |          |          |          |                                                    |          |          |          |
|----------------------------------------------------|----------|----------|----------|----------------------------------------------------|----------|----------|----------|
| H                                                  | -5.57268 | -0.02801 | -2.60748 | H                                                  | 4.75452  | 2.54385  | -1.89907 |
| H                                                  | -4.04289 | -1.31689 | 1.93822  | H                                                  | 4.61494  | -0.89067 | 1.68782  |
| S                                                  | 1.33363  | 1.70488  | -0.15889 | S                                                  | -1.29833 | -1.24664 | -1.10001 |
| O                                                  | 1.73704  | 2.73554  | 0.80003  | O                                                  | -1.70993 | -2.65601 | -1.08011 |
| O                                                  | 0.98855  | 2.07347  | -1.54218 | O                                                  | -0.86118 | -0.63422 | -2.37045 |
| C                                                  | 2.58534  | 0.42434  | -0.19454 | C                                                  | -2.62026 | -0.24898 | -0.41304 |
| C                                                  | 3.32885  | 0.16404  | 0.96230  | C                                                  | -3.45069 | -0.79767 | 0.56959  |
| C                                                  | 2.80854  | -0.28578 | -1.37627 | C                                                  | -2.80614 | 1.05826  | -0.87003 |
| C                                                  | 4.30125  | -0.83500 | 0.92690  | C                                                  | -4.47513 | -0.01424 | 1.10332  |
| C                                                  | 3.78993  | -1.28119 | -1.39090 | C                                                  | -3.83817 | 1.82587  | -0.32452 |
| C                                                  | 4.54541  | -1.57473 | -0.24466 | C                                                  | -4.68608 | 1.30546  | 0.66724  |
| H                                                  | 3.15663  | 0.74038  | 1.86728  | H                                                  | -3.30178 | -1.82087 | 0.90370  |
| H                                                  | 2.23895  | -0.05389 | -2.27204 | H                                                  | -2.16262 | 1.46239  | -1.64670 |
| H                                                  | 4.88487  | -1.03794 | 1.82302  | H                                                  | -5.12188 | -0.43819 | 1.86928  |
| H                                                  | 3.97254  | -1.83025 | -2.31243 | H                                                  | -3.98670 | 2.84365  | -0.68047 |
| C                                                  | 5.58996  | -2.66734 | -0.25721 | C                                                  | -5.82050 | 2.13192  | 1.22920  |
| H                                                  | 6.51111  | -2.34242 | 0.23761  | H                                                  | -6.01964 | 1.88001  | 2.27533  |
| H                                                  | 5.22968  | -3.55438 | 0.27800  | H                                                  | -5.60476 | 3.20282  | 1.16970  |
| H                                                  | 5.83996  | -2.97343 | -1.27682 | H                                                  | -6.74538 | 1.95092  | 0.66739  |
| TS2'                                               |          |          |          | M2'                                                |          |          |          |
| N                                                  | 2.12309  | -1.38028 | 1.80366  | C                                                  | -2.62165 | -1.24108 | -0.10287 |
| N                                                  | 2.38066  | -1.94822 | 2.72348  | C                                                  | -1.29401 | -1.41567 | 0.22389  |
| C                                                  | 2.37020  | -0.86207 | -0.06362 | N                                                  | -0.24552 | -1.29979 | -0.56945 |
| C                                                  | 1.06707  | -0.94517 | -0.52438 | H                                                  | -1.18627 | -1.82516 | 1.24905  |
| N                                                  | -0.02707 | -1.24253 | 0.14216  | C                                                  | -4.84892 | -0.30222 | -0.41644 |
| H                                                  | 1.05396  | -0.84796 | -1.62427 | C                                                  | -5.72684 | 0.77427  | -0.40292 |
| C                                                  | 4.71854  | -0.11599 | 0.01301  | C                                                  | -3.48002 | -0.12860 | -0.05259 |
| C                                                  | 5.68349  | 0.88584  | -0.05785 | H                                                  | -6.76897 | 0.64092  | -0.68169 |
| C                                                  | 3.34258  | 0.20010  | -0.09830 | C                                                  | -5.25722 | 2.04263  | -0.02527 |
| H                                                  | 6.73822  | 0.63643  | 0.02854  | C                                                  | -3.03031 | 1.17580  | 0.32526  |
| C                                                  | 5.29067  | 2.21763  | -0.25651 | H                                                  | -5.94550 | 2.88564  | -0.01341 |
| C                                                  | 2.96442  | 1.55435  | -0.28259 | H                                                  | -1.98676 | 1.31475  | 0.59682  |
| H                                                  | 6.04523  | 2.99888  | -0.32085 | C                                                  | -3.91356 | 2.24601  | 0.33751  |
| H                                                  | 1.90912  | 1.80647  | -0.35575 | H                                                  | -3.57455 | 3.23854  | 0.62390  |
| C                                                  | 3.93354  | 2.55118  | -0.37453 | H                                                  | -5.18012 | -1.29651 | -0.70470 |
| H                                                  | 3.63920  | 3.58664  | -0.52859 | S                                                  | 1.19116  | -1.88265 | 0.08992  |
| H                                                  | 5.00798  | -1.15556 | 0.14689  | O                                                  | 1.74258  | -2.88124 | -0.83984 |
| S                                                  | -1.37561 | -1.59640 | -0.80322 | O                                                  | 1.02363  | -2.25290 | 1.51528  |
| O                                                  | -1.90065 | -2.89280 | -0.34624 | C                                                  | 2.24044  | -0.42332 | 0.01798  |
| O                                                  | -1.09845 | -1.40230 | -2.24439 | C                                                  | 2.80891  | -0.04754 | -1.20414 |
| C                                                  | -2.53245 | -0.31926 | -0.28826 | C                                                  | 2.48578  | 0.30994  | 1.18008  |
| C                                                  | -3.20755 | -0.45553 | 0.92968  | C                                                  | 3.62173  | 1.08524  | -1.25460 |
| C                                                  | -2.74900 | 0.78829  | -1.10990 | C                                                  | 3.30675  | 1.44066  | 1.11135  |
| C                                                  | -4.10025 | 0.54090  | 1.32583  | C                                                  | 3.88483  | 1.84638  | -0.10134 |
| C                                                  | -3.64987 | 1.77602  | -0.69798 | H                                                  | 2.62315  | -0.63771 | -2.09750 |
| C                                                  | -4.33668 | 1.67021  | 0.52127  | H                                                  | 2.05272  | -0.00736 | 2.12481  |
| H                                                  | -3.04168 | -1.33147 | 1.55107  | H                                                  | 4.06353  | 1.37921  | -2.20527 |
| H                                                  | -2.23094 | 0.86889  | -2.06165 | H                                                  | 3.50347  | 2.00888  | 2.01869  |
| H                                                  | -4.62620 | 0.43656  | 2.27335  | C                                                  | 4.79361  | 3.05348  | -0.16886 |
| H                                                  | -3.82298 | 2.63722  | -1.34069 | H                                                  | 4.57295  | 3.67023  | -1.04647 |
| C                                                  | -5.33066 | 2.72566  | 0.95196  | H                                                  | 4.69577  | 3.68066  | 0.72192  |
| H                                                  | -5.22011 | 2.96788  | 2.01416  | H                                                  | 5.84388  | 2.74608  | -0.24439 |
| H                                                  | -5.21090 | 3.64889  | 0.37769  |                                                    |          |          |          |
| H                                                  | -6.35942 | 2.37457  | 0.80458  |                                                    |          |          |          |
| Rh <sub>2</sub> (CH <sub>3</sub> COO) <sub>4</sub> |          |          |          | Rh <sub>2</sub> (CF <sub>3</sub> COO) <sub>4</sub> |          |          |          |
| C                                                  | -1.92550 | 1.83801  | 0.00046  | C                                                  | -1.88471 | 1.82687  | 0.01224  |
| O                                                  | -1.50709 | 1.42863  | -1.13425 | O                                                  | -1.50267 | 1.43694  | -1.12782 |
| O                                                  | -1.50591 | 1.42954  | 1.13505  | O                                                  | -1.48218 | 1.44988  | 1.14822  |
| Rh                                                 | 0.00014  | -0.00027 | 1.19791  | Rh                                                 | 0.01215  | 0.00744  | 1.20772  |
| Rh                                                 | 0.00004  | -0.00003 | -1.19763 | Rh                                                 | -0.01207 | -0.00773 | -1.20775 |
| C                                                  | -1.83807 | -1.92573 | 0.00002  | C                                                  | -1.82538 | -1.88611 | 0.03566  |
| O                                                  | -1.42863 | -1.50716 | -1.13460 | O                                                  | -1.45317 | -1.50083 | -1.10927 |
| O                                                  | -1.42966 | -1.50631 | 1.13470  | O                                                  | -1.43238 | -1.48537 | 1.16679  |
| C                                                  | 1.83825  | 1.92543  | 0.00028  | C                                                  | 1.82551  | 1.88577  | -0.03568 |
| O                                                  | 1.42871  | 1.50709  | -1.13440 | O                                                  | 1.43254  | 1.48501  | -1.16681 |
| O                                                  | 1.42994  | 1.50578  | 1.13491  | O                                                  | 1.45321  | 1.50056  | 1.10924  |
| C                                                  | 1.92567  | -1.83831 | -0.00014 | C                                                  | 1.88481  | -1.82715 | -0.01226 |

|                                                          |          |          |          |                                                          |           |          |          |
|----------------------------------------------------------|----------|----------|----------|----------------------------------------------------------|-----------|----------|----------|
| O                                                        | 1.50716  | -1.42870 | -1.13473 | O                                                        | 1.48221   | -1.45024 | -1.14824 |
| O                                                        | 1.50619  | -1.43007 | 1.13458  | O                                                        | 1.50281   | -1.43718 | 1.12780  |
| C                                                        | -2.98602 | 2.91467  | 0.00035  | C                                                        | -2.92142  | -2.98960 | 0.02677  |
| H                                                        | -3.59711 | 2.84748  | 0.90229  | F                                                        | -4.05090  | -2.49555 | -0.51706 |
| H                                                        | -2.49057 | 3.89187  | -0.00781 | F                                                        | -2.51519  | -4.03597 | -0.71444 |
| H                                                        | -3.60615 | 2.83787  | -0.89469 | F                                                        | -3.19635  | -3.42124 | 1.26281  |
| C                                                        | -2.91477 | -2.98622 | -0.00011 | C                                                        | -2.98325  | 2.92768  | -0.00967 |
| H                                                        | -2.84388 | -3.60089 | 0.89913  | F                                                        | -2.47348  | 4.05718  | -0.53973 |
| H                                                        | -3.89197 | -2.49073 | -0.00191 | F                                                        | -4.01944  | 2.53170  | -0.76968 |
| H                                                        | -2.84168 | -3.60279 | -0.89789 | F                                                        | -3.43325  | 3.19919  | 1.22064  |
| C                                                        | 2.91497  | 2.98589  | 0.00018  | C                                                        | 2.92170   | 2.98911  | -0.02680 |
| H                                                        | 2.84572  | 3.59896  | 0.90064  | F                                                        | 2.51586   | 4.03534  | 0.71482  |
| H                                                        | 3.89215  | 2.49038  | -0.00441 | F                                                        | 4.05126   | 2.49472  | 0.51656  |
| H                                                        | 2.84027  | 3.60406  | -0.89638 | F                                                        | 3.19633   | 3.42105  | -1.26280 |
| C                                                        | 2.98617  | -2.91499 | -0.00038 | C                                                        | 2.98343   | -2.92788 | 0.00964  |
| H                                                        | 3.60071  | -2.84431 | 0.89898  | F                                                        | 4.01966   | -2.53174 | 0.76953  |
| H                                                        | 2.49069  | -3.89220 | -0.00250 | F                                                        | 2.47382   | -4.05737 | 0.53984  |
| H                                                        | 3.60288  | -2.84167 | -0.89805 | F                                                        | 3.43334   | -3.19944 | -1.22069 |
| TS2(Rh <sub>2</sub> (CH <sub>3</sub> COO) <sub>4</sub> ) |          |          |          | TS2(Rh <sub>2</sub> (CF <sub>3</sub> COO) <sub>4</sub> ) |           |          |          |
| C                                                        | -1.27569 | -2.54173 | 1.33138  | C                                                        | 0.58553   | -2.57647 | -1.17550 |
| O                                                        | -0.56936 | -1.48879 | 1.15182  | O                                                        | -0.05651  | -1.49057 | -1.06458 |
| O                                                        | -2.47111 | -2.71033 | 0.93403  | O                                                        | 1.73977   | -2.86237 | -0.76558 |
| Rh                                                       | -3.42338 | -1.18955 | -0.13716 | Rh                                                       | 2.83429   | -1.38854 | 0.24081  |
| Rh                                                       | -1.35068 | 0.09944  | 0.06176  | Rh                                                       | 0.86136   | 0.09158  | -0.06443 |
| C                                                        | -3.27774 | 0.52828  | 2.23996  | C                                                        | 2.83102   | 0.17963  | -2.21051 |
| O                                                        | -2.12280 | 0.90776  | 1.83045  | O                                                        | 1.71567   | 0.68775  | -1.87875 |
| O                                                        | -4.03857 | -0.29972 | 1.65293  | O                                                        | 3.53333   | -0.66113 | -1.59986 |
| C                                                        | -1.51942 | -1.64201 | -2.30874 | C                                                        | 0.88441   | -1.47775 | 2.38894  |
| O                                                        | -0.74921 | -0.80153 | -1.72534 | O                                                        | 0.17582   | -0.62671 | 1.77541  |
| O                                                        | -2.67002 | -1.99910 | -1.90484 | O                                                        | 1.98193   | -1.99011 | 2.04953  |
| C                                                        | -3.50428 | 1.42603  | -1.44506 | C                                                        | 3.11948   | 1.27629  | 1.35035  |
| O                                                        | -2.29928 | 1.59901  | -1.05328 | O                                                        | 1.94891   | 1.55941  | 0.95851  |
| O                                                        | -4.23014 | 0.40878  | -1.20894 | O                                                        | 3.76802   | 0.20702  | 1.22264  |
| N                                                        | 0.89699  | 0.99185  | 1.96248  | N                                                        | -1.31207  | 1.02665  | -1.99962 |
| N                                                        | 0.66640  | 0.95106  | 3.04804  | N                                                        | -1.18870  | 0.88514  | -3.09287 |
| C                                                        | 0.56950  | 1.20827  | 0.22288  | C                                                        | -0.91704  | 1.38127  | -0.31472 |
| C                                                        | 1.57882  | 0.34001  | -0.36547 | C                                                        | -2.02796  | 0.72161  | 0.37824  |
| N                                                        | 2.44679  | -0.33415 | 0.30752  | N                                                        | -2.96592  | 0.08563  | -0.22353 |
| H                                                        | 1.47375  | 0.24516  | -1.45447 | H                                                        | -1.94722  | 0.76977  | 1.47272  |
| C                                                        | -0.42201 | 3.49484  | 0.43787  | C                                                        | 0.32755   | 3.51092  | -0.77673 |
| C                                                        | -0.36474 | 4.87217  | 0.23307  | C                                                        | 0.43177   | 4.89776  | -0.70047 |
| C                                                        | 0.63579  | 2.66687  | 0.00639  | C                                                        | -0.80309  | 2.85158  | -0.24843 |
| H                                                        | -1.17990 | 5.50446  | 0.57735  | H                                                        | 1.30392   | 5.39677  | -1.11557 |
| C                                                        | 0.73147  | 5.44140  | -0.42897 | C                                                        | -0.57563  | 5.64636  | -0.07756 |
| C                                                        | 1.74606  | 3.25492  | -0.63844 | C                                                        | -1.82430  | 3.61990  | 0.35492  |
| H                                                        | 0.76664  | 6.51549  | -0.59853 | H                                                        | -0.48429  | 6.72805  | -0.00795 |
| H                                                        | 2.57982  | 2.63601  | -0.96092 | H                                                        | -2.71257  | 3.13578  | 0.75278  |
| C                                                        | 1.78373  | 4.62987  | -0.87096 | C                                                        | -1.70104  | 5.00500  | 0.45439  |
| H                                                        | 2.63628  | 5.07038  | -1.38246 | H                                                        | -2.48463  | 5.58481  | 0.93591  |
| H                                                        | -1.27795 | 3.04751  | 0.93204  | H                                                        | 1.11442   | 2.93534  | -1.25182 |
| S                                                        | 3.37416  | -1.46406 | -0.60600 | S                                                        | -4.06542  | -0.76974 | 0.81793  |
| O                                                        | 3.14555  | -1.29550 | -2.05304 | O                                                        | -3.87556  | -0.34892 | 2.21585  |
| O                                                        | 3.15257  | -2.77213 | 0.02206  | O                                                        | -3.93911  | -2.18084 | 0.44351  |
| C                                                        | 5.03531  | -0.90841 | -0.22373 | C                                                        | -5.62750  | -0.13079 | 0.22592  |
| C                                                        | 5.75620  | -0.18893 | -1.17875 | C                                                        | -6.30493  | 0.83138  | 0.97832  |
| C                                                        | 5.59063  | -1.21834 | 1.02302  | C                                                        | -6.15346  | -0.62032 | -0.97540 |
| C                                                        | 7.05383  | 0.23217  | -0.87191 | C                                                        | -7.52946  | 1.31532  | 0.50907  |
| C                                                        | 6.88506  | -0.78659 | 1.31109  | C                                                        | -7.37472  | -0.12160 | -1.42703 |
| C                                                        | 7.63674  | -0.05696 | 0.37179  | C                                                        | -8.08145  | 0.85057  | -0.69531 |
| H                                                        | 5.31488  | 0.02606  | -2.14812 | H                                                        | -5.88946  | 1.18346  | 1.91857  |
| H                                                        | 5.02261  | -1.79368 | 1.74915  | H                                                        | -5.62160  | -1.38230 | -1.53892 |
| H                                                        | 7.61985  | 0.78882  | -1.61625 | H                                                        | -8.06341  | 2.06101  | 1.09464  |
| H                                                        | 7.32024  | -1.02479 | 2.28003  | H                                                        | -7.78819  | -0.49835 | -2.36072 |
| C                                                        | 9.04910  | 0.37727  | 0.69172  | C                                                        | -9.41865  | 1.35615  | -1.18607 |
| H                                                        | 9.40369  | 1.14012  | -0.00709 | H                                                        | -9.70708  | 2.28410  | -0.68451 |
| H                                                        | 9.12077  | 0.78293  | 1.70622  | H                                                        | -9.40324  | 1.53999  | -2.26519 |
| H                                                        | 9.73871  | -0.47365 | 0.63291  | H                                                        | -10.20512 | 0.61616  | -0.99381 |

|                                     |          |          |          |                                           |          |          |          |
|-------------------------------------|----------|----------|----------|-------------------------------------------|----------|----------|----------|
| C                                   | -3.75093 | 1.10856  | 3.55565  | C                                         | 3.84012  | 2.44741  | 2.07754  |
| H                                   | -3.28832 | 0.54582  | 4.37398  | F                                         | 3.08892  | 2.89742  | 3.10098  |
| H                                   | -3.43943 | 2.15150  | 3.64806  | F                                         | 5.03369  | 2.07841  | 2.55790  |
| H                                   | -4.83521 | 1.02246  | 3.64210  | F                                         | 4.02850  | 3.47005  | 1.21392  |
| C                                   | -0.60997 | -3.66597 | 2.09353  | C                                         | 3.37306  | 0.69488  | -3.57403 |
| H                                   | 0.36511  | -3.88131 | 1.64811  | F                                         | 3.49994  | 2.03894  | -3.54015 |
| H                                   | -0.43792 | -3.34751 | 3.12690  | F                                         | 4.56418  | 0.16536  | -3.87125 |
| H                                   | -1.23766 | -4.55802 | 2.08762  | F                                         | 2.50727  | 0.38230  | -4.56045 |
| C                                   | -1.00333 | -2.23704 | -3.60026 | C                                         | -0.15958 | -3.73140 | -1.90480 |
| H                                   | -1.02739 | -1.46851 | -4.38024 | F                                         | -1.22680 | -3.28610 | -2.58290 |
| H                                   | 0.03626  | -2.55045 | -3.47576 | F                                         | 0.66560  | -4.34676 | -2.77264 |
| H                                   | -1.62348 | -3.08007 | -3.90786 | F                                         | -0.57515 | -4.64013 | -1.00053 |
| C                                   | -4.10831 | 2.52730  | -2.29107 | C                                         | 0.34232  | -1.95226 | 3.76794  |
| H                                   | -3.65450 | 3.49056  | -2.05069 | F                                         | -0.85962 | -1.43122 | 4.04109  |
| H                                   | -3.90715 | 2.30724  | -3.34545 | F                                         | 0.24466  | -3.29387 | 3.79179  |
| H                                   | -5.19050 | 2.56300  | -2.15101 | F                                         | 1.20006  | -1.57426 | 4.74047  |
| Rh <sub>2</sub> (HCOO) <sub>4</sub> |          |          |          | TS2(Rh <sub>2</sub> (HCOO) <sub>4</sub> ) |          |          |          |
| C                                   | -1.86813 | -1.82160 | 0.15594  | C                                         | -1.69627 | -2.46752 | 1.45924  |
| O                                   | -1.51188 | -1.42042 | -0.99560 | O                                         | -0.90284 | -1.49599 | 1.23649  |
| O                                   | -1.41960 | -1.44088 | 1.28185  | O                                         | -2.89241 | -2.60121 | 1.07062  |
| Rh                                  | 0.07542  | 0.00465  | 1.29832  | Rh                                        | -3.73715 | -1.08736 | -0.10178 |
| Rh                                  | -0.02395 | 0.02815  | -1.10694 | Rh                                        | -1.57472 | 0.08795  | 0.06207  |
| C                                   | 1.86142  | -1.87834 | 0.00137  | C                                         | -3.49436 | 0.72961  | 2.17193  |
| O                                   | 1.42506  | -1.46362 | -1.11732 | O                                         | -2.31149 | 1.01769  | 1.78824  |
| O                                   | 1.51720  | -1.48759 | 1.16010  | O                                         | -4.31480 | -0.06491 | 1.63429  |
| C                                   | -1.80968 | 1.91138  | 0.19000  | C                                         | -1.83770 | -1.74764 | -2.20242 |
| O                                   | -1.46755 | 1.51861  | -0.96868 | O                                         | -1.01350 | -0.93239 | -1.67427 |
| O                                   | -1.37159 | 1.49832  | 1.30861  | O                                         | -3.00876 | -2.02958 | -1.81742 |
| C                                   | 1.91965  | 1.85437  | 0.03543  | C                                         | -3.62599 | 1.45093  | -1.51953 |
| O                                   | 1.46926  | 1.47559  | -1.09042 | O                                         | -2.42095 | 1.58804  | -1.13282 |
| O                                   | 1.56525  | 1.45125  | 1.18684  | O                                         | -4.42600 | 0.50266  | -1.27092 |
| H                                   | 2.70858  | 2.62040  | 0.01036  | N                                         | 0.72930  | 0.89478  | 1.92113  |
| H                                   | -2.57410 | 2.70128  | 0.22922  | N                                         | 0.53260  | 0.88895  | 3.01362  |
| H                                   | -2.65691 | -2.58778 | 0.18097  | C                                         | 0.39459  | 1.10082  | 0.18749  |
| H                                   | 2.62628  | -2.66783 | -0.03790 | C                                         | 1.37212  | 0.19016  | -0.40034 |
|                                     |          |          |          | N                                         | 2.22169  | -0.49954 | 0.27645  |
|                                     |          |          |          | H                                         | 1.26491  | 0.09390  | -1.48908 |
|                                     |          |          |          | C                                         | -0.48862 | 3.43899  | 0.36490  |
|                                     |          |          |          | C                                         | -0.36526 | 4.80778  | 0.13445  |
|                                     |          |          |          | C                                         | 0.52736  | 2.55275  | -0.05127 |
|                                     |          |          |          | H                                         | -1.14976 | 5.48413  | 0.46567  |
|                                     |          |          |          | C                                         | 0.75759  | 5.31137  | -0.53567 |
|                                     |          |          |          | C                                         | 1.66560  | 3.07521  | -0.70451 |
|                                     |          |          |          | H                                         | 0.84432  | 6.37918  | -0.72496 |
|                                     |          |          |          | H                                         | 2.46889  | 2.41224  | -1.01619 |
|                                     |          |          |          | C                                         | 1.77015  | 4.44226  | -0.96043 |
|                                     |          |          |          | H                                         | 2.64352  | 4.83162  | -1.47813 |
|                                     |          |          |          | H                                         | -1.36477 | 3.04630  | 0.86950  |
|                                     |          |          |          | S                                         | 3.13657  | -1.64812 | -0.63657 |
|                                     |          |          |          | O                                         | 2.91702  | -1.46570 | -2.08251 |
|                                     |          |          |          | O                                         | 2.88305  | -2.95105 | -0.01245 |
|                                     |          |          |          | C                                         | 4.80246  | -1.12066 | -0.23952 |
|                                     |          |          |          | C                                         | 5.54026  | -0.40482 | -1.18457 |
|                                     |          |          |          | C                                         | 5.34409  | -1.44820 | 1.00882  |
|                                     |          |          |          | C                                         | 6.84143  | -0.00489 | -0.86532 |
|                                     |          |          |          | C                                         | 6.64247  | -1.03730 | 1.30904  |
|                                     |          |          |          | C                                         | 7.41105  | -0.31148 | 0.38051  |
|                                     |          |          |          | H                                         | 5.10931  | -0.17669 | -2.15562 |
|                                     |          |          |          | H                                         | 4.76275  | -2.02074 | 1.72660  |
|                                     |          |          |          | H                                         | 7.42086  | 0.54881  | -1.60146 |
|                                     |          |          |          | H                                         | 7.06730  | -1.28903 | 2.27911  |
|                                     |          |          |          | C                                         | 8.82703  | 0.10015  | 0.71352  |
|                                     |          |          |          | H                                         | 9.19474  | 0.86847  | 0.02765  |
|                                     |          |          |          | H                                         | 8.89878  | 0.48976  | 1.73424  |
|                                     |          |          |          | H                                         | 9.50589  | -0.75866 | 0.64535  |
|                                     |          |          |          | H                                         | -3.83201 | 1.24268  | 3.08593  |
|                                     |          |          |          | H                                         | -1.47727 | -2.26403 | -3.10518 |

|                                                           |          |          |          |          |                                                           |          |          |          |          |
|-----------------------------------------------------------|----------|----------|----------|----------|-----------------------------------------------------------|----------|----------|----------|----------|
|                                                           | H        | -1.28053 | -3.28550 | 2.06725  |                                                           | H        | -1.28053 | -3.28550 | 2.06725  |
|                                                           | H        | -4.01589 | 2.26612  | -2.14930 |                                                           | H        | -4.01589 | 2.26612  | -2.14930 |
| Rh <sub>2</sub> (CHF <sub>2</sub> COO) <sub>4</sub>       |          |          |          |          | Rh <sub>2</sub> (CH <sub>2</sub> FCOO) <sub>4</sub>       |          |          |          |          |
| C                                                         | 0.57818  | -2.61515 | -1.11291 |          | C                                                         | 0.59371  | -2.60928 | -1.18814 |          |
| O                                                         | -0.06427 | -1.53355 | -0.93739 |          | O                                                         | -0.04205 | -1.51338 | -1.04301 |          |
| O                                                         | 1.76571  | -2.87578 | -0.76741 |          | O                                                         | 1.76885  | -2.86675 | -0.79276 |          |
| Rh                                                        | 2.85104  | -1.38769 | 0.19341  |          | Rh                                                        | 2.82492  | -1.37719 | 0.20186  |          |
| Rh                                                        | 0.92549  | 0.04806  | -0.02234 |          | Rh                                                        | 0.90598  | 0.05026  | -0.05193 |          |
| C                                                         | 2.78012  | 0.16845  | -2.24646 |          | C                                                         | 2.82854  | 0.20585  | -2.23020 |          |
| O                                                         | 1.66742  | 0.64979  | -1.86744 |          | O                                                         | 1.71460  | 0.70058  | -1.85477 |          |
| O                                                         | 3.50308  | -0.67725 | -1.64689 |          | O                                                         | 3.52399  | -0.65729 | -1.61813 |          |
| C                                                         | 1.00244  | -1.51329 | 2.41795  |          | C                                                         | 0.91625  | -1.52417 | 2.39069  |          |
| O                                                         | 0.29290  | -0.63549 | 1.83540  |          | O                                                         | 0.20538  | -0.67573 | 1.76171  |          |
| O                                                         | 2.09102  | -2.01818 | 2.02098  |          | O                                                         | 2.02340  | -2.01726 | 2.00607  |          |
| C                                                         | 3.20480  | 1.27064  | 1.28485  |          | C                                                         | 3.14361  | 1.26733  | 1.35013  |          |
| O                                                         | 2.02459  | 1.54752  | 0.90546  |          | O                                                         | 1.95966  | 1.53053  | 0.95557  |          |
| O                                                         | 3.82901  | 0.18094  | 1.14194  |          | O                                                         | 3.77709  | 0.18291  | 1.18647  |          |
| C                                                         | 3.91866  | 2.41733  | 2.02950  |          | C                                                         | 3.82338  | 2.40671  | 2.09805  |          |
| F                                                         | 3.51584  | 2.37581  | 3.34103  |          | F                                                         | 5.12337  | 2.08905  | 2.45227  |          |
| F                                                         | 5.26541  | 2.25536  | 1.99291  |          | C                                                         | 3.33549  | 0.74319  | -3.56245 |          |
| C                                                         | 3.28871  | 0.72787  | -3.59091 |          | F                                                         | 4.53763  | 0.16361  | -3.93018 |          |
| F                                                         | 3.90166  | 1.92940  | -3.33639 |          | C                                                         | -0.18497 | -3.69209 | -1.92426 |          |
| F                                                         | 4.20217  | -0.10572 | -4.14930 |          | F                                                         | 0.53537  | -4.87020 | -2.02353 |          |
| C                                                         | -0.20964 | -3.70753 | -1.86470 |          | C                                                         | 0.40033  | -1.97682 | 3.75610  |          |
| F                                                         | -0.10836 | -3.44380 | -3.20790 |          | F                                                         | 0.98717  | -1.16197 | 4.73137  |          |
| F                                                         | 0.31943  | -4.93504 | -1.63117 |          | H                                                         | -0.42250 | -3.33319 | -2.93092 |          |
| C                                                         | 0.41938  | -2.01891 | 3.75345  |          | H                                                         | 3.47249  | 1.82596  | -3.47703 |          |
| F                                                         | -0.51200 | -2.98411 | 3.46175  |          | H                                                         | 3.24884  | 2.62249  | 3.00473  |          |
| F                                                         | 1.38583  | -2.57946 | 4.52346  |          | H                                                         | -0.68304 | -1.85244 | 3.81258  |          |
| H                                                         | -1.26672 | -3.70430 | -1.58525 |          | H                                                         | 3.83381  | 3.29490  | 1.45862  |          |
| H                                                         | 2.46700  | 0.89501  | -4.29263 |          | H                                                         | 0.69751  | -3.00991 | 3.94955  |          |
| H                                                         | 3.65477  | 3.39279  | 1.61203  |          | H                                                         | 2.58802  | 0.53601  | -4.33483 |          |
| H                                                         | -0.07106 | -1.21425 | 4.30797  |          | H                                                         | -1.11676 | -3.88743 | -1.38419 |          |
| TS2(Rh <sub>2</sub> (CHF <sub>2</sub> COO) <sub>4</sub> ) |          |          |          |          | TS2(Rh <sub>2</sub> (CH <sub>2</sub> FCOO) <sub>4</sub> ) |          |          |          |          |
| C                                                         | 0.28439  | -2.51405 | -1.11895 |          | C                                                         | 0.80351  | -2.46368 | -1.24870 |          |
| O                                                         | -0.19045 | -1.34126 | -0.98451 |          | O                                                         | 0.17336  | -1.35904 | -1.11445 |          |
| O                                                         | 1.43056  | -2.93052 | -0.80576 |          | O                                                         | 1.97972  | -2.72326 | -0.87605 |          |
| Rh                                                        | 2.77453  | -1.57712 | 0.06627  |          | Rh                                                        | 3.06866  | -1.24434 | 0.12734  |          |
| Rh                                                        | 0.96391  | 0.10572  | -0.04714 |          | Rh                                                        | 1.08067  | 0.19580  | -0.07465 |          |
| C                                                         | 2.73562  | 0.04625  | -2.35790 |          | C                                                         | 2.99772  | 0.41610  | -2.27596 |          |
| O                                                         | 1.73444  | 0.67928  | -1.89926 |          | O                                                         | 1.88322  | 0.90351  | -1.87390 |          |
| O                                                         | 3.36692  | -0.91024 | -1.82936 |          | O                                                         | 3.70679  | -0.45024 | -1.70159 |          |
| C                                                         | 1.02887  | -1.51825 | 2.38650  |          | C                                                         | 1.17991  | -1.49870 | 2.32209  |          |
| O                                                         | 0.35004  | -0.60013 | 1.82387  |          | O                                                         | 0.45022  | -0.62153 | 1.74434  |          |
| O                                                         | 2.04882  | -2.11265 | 1.95179  |          | O                                                         | 2.29201  | -1.94564 | 1.93245  |          |
| C                                                         | 3.45509  | 1.02258  | 1.17385  |          | C                                                         | 3.35217  | 1.38163  | 1.35143  |          |
| O                                                         | 2.27442  | 1.42206  | 0.92303  |          | O                                                         | 2.15590  | 1.64705  | 0.98982  |          |
| O                                                         | 3.96877  | -0.10490 | 0.94766  |          | O                                                         | 4.00606  | 0.32421  | 1.14039  |          |
| N                                                         | -1.14922 | 1.38625  | -1.87318 |          | N                                                         | -1.12178 | 1.19797  | -1.96871 |          |
| N                                                         | -1.02097 | 1.35995  | -2.97487 |          | N                                                         | -0.92299 | 1.14676  | -3.05973 |          |
| C                                                         | -0.73236 | 1.53608  | -0.14944 |          | C                                                         | -0.76932 | 1.42227  | -0.23749 |          |
| C                                                         | -1.83560 | 0.80808  | 0.46771  |          | C                                                         | -1.81056 | 0.60381  | 0.36968  |          |
| N                                                         | -2.76800 | 0.21859  | -0.19465 |          | N                                                         | -2.68819 | -0.06618 | -0.29237 |          |
| H                                                         | -1.73119 | 0.71350  | 1.55679  |          | H                                                         | -1.71314 | 0.53197  | 1.46105  |          |
| C                                                         | 0.61335  | 3.63106  | -0.38344 |          | C                                                         | 0.34453  | 3.64928  | -0.47406 |          |
| C                                                         | 0.78779  | 4.99479  | -0.15878 |          | C                                                         | 0.35912  | 5.02963  | -0.28433 |          |
| C                                                         | -0.54963 | 2.97799  | 0.07849  |          | C                                                         | -0.75717 | 2.88270  | -0.03812 |          |
| H                                                         | 1.68309  | 5.49154  | -0.52437 |          | H                                                         | 1.20698  | 5.61526  | -0.63191 |          |
| C                                                         | -0.17995 | 5.72055  | 0.54881  |          | C                                                         | -0.70948 | 5.66218  | 0.36552  |          |
| C                                                         | -1.53044 | 3.72546  | 0.76842  |          | C                                                         | -1.83903 | 3.53489  | 0.59389  |          |
| H                                                         | -0.03442 | 6.78276  | 0.73304  |          | H                                                         | -0.68925 | 6.73842  | 0.52285  |          |
| H                                                         | -2.44170 | 3.24300  | 1.11391  |          | H                                                         | -2.70544 | 2.96376  | 0.91873  |          |
| C                                                         | -1.33622 | 5.08340  | 1.01730  |          | C                                                         | -1.80549 | 4.91225  | 0.81033  |          |
| H                                                         | -2.08841 | 5.64762  | 1.56325  |          | H                                                         | -2.63622 | 5.40301  | 1.31166  |          |
| H                                                         | 1.37012  | 3.06775  | -0.91952 |          | H                                                         | 1.17787  | 3.15358  | -0.96081 |          |
| S                                                         | -3.74883 | -0.86771 | 0.72194  |          | S                                                         | -3.61422 | -1.18620 | 0.64116  |          |
| O                                                         | -3.52406 | -0.68725 | 2.16764  |          | O                                                         | -3.40060 | -0.97143 | 2.08412  |          |

|                                      |           |          |          |                                                            |          |          |          |
|--------------------------------------|-----------|----------|----------|------------------------------------------------------------|----------|----------|----------|
| O                                    | -3.53548  | -2.18754 | 0.11181  | O                                                          | -3.34861 | -2.50410 | 0.05089  |
| C                                    | -5.38730  | -0.28363 | 0.30811  | C                                                          | -5.27906 | -0.67766 | 0.22310  |
| C                                    | -6.10239  | 0.47185  | 1.23993  | C                                                          | -6.01660 | 0.07691  | 1.13806  |
| C                                    | -5.93074  | -0.60503 | -0.94128 | C                                                          | -5.81989 | -1.05599 | -1.01104 |
| C                                    | -7.38421  | 0.91808  | 0.90532  | C                                                          | -7.31683 | 0.46454  | 0.80160  |
| C                                    | -7.20952  | -0.14718 | -1.25595 | C                                                          | -7.11786 | -0.65671 | -1.32852 |
| C                                    | -7.95591  | 0.61878  | -0.34150 | C                                                          | -7.88609 | 0.10738  | -0.43109 |
| H                                    | -5.67017  | 0.69544  | 2.21140  | H                                                          | -5.58659 | 0.34405  | 2.09949  |
| H                                    | -5.36737  | -1.20767 | -1.64857 | H                                                          | -5.23911 | -1.65865 | -1.70409 |
| H                                    | -7.94683  | 1.50303  | 1.63009  | H                                                          | -7.89623 | 1.04853  | 1.51392  |
| H                                    | -7.63647  | -0.39339 | -2.22640 | H                                                          | -7.54254 | -0.94817 | -2.28739 |
| C                                    | -9.35200  | 1.08083  | -0.69066 | C                                                          | -9.30205 | 0.50507  | -0.78008 |
| H                                    | -10.06347 | 0.24925  | -0.61796 | H                                                          | -9.65944 | 1.32012  | -0.14455 |
| H                                    | -9.69512  | 1.87077  | -0.01685 | H                                                          | -9.38034 | 0.82487  | -1.82416 |
| H                                    | -9.40057  | 1.46019  | -1.71651 | H                                                          | -9.98512 | -0.34291 | -0.64786 |
| C                                    | 4.33756   | 2.10002  | 1.83996  | C                                                          | 4.01609  | 2.51292  | 2.13032  |
| F                                    | 5.51300   | 1.57557  | 2.27305  | F                                                          | 5.32502  | 2.21263  | 2.47191  |
| F                                    | 4.62164   | 3.06300  | 0.90061  | C                                                          | 3.46534  | 0.98607  | -3.61120 |
| C                                    | 3.25635   | 0.50808  | -3.73310 | F                                                          | 4.68941  | 0.46615  | -3.99703 |
| F                                    | 2.24015   | 0.46979  | -4.64608 | C                                                          | -0.01961 | -3.54797 | -1.93374 |
| F                                    | 3.68461   | 1.80522  | -3.63583 | F                                                          | 0.70887  | -4.71389 | -2.11421 |
| C                                    | -0.72158  | -3.50110 | -1.74753 | C                                                          | 0.58129  | -2.02786 | 3.62027  |
| F                                    | -0.81503  | -3.21693 | -3.09009 | F                                                          | 1.41950  | -2.94027 | 4.24139  |
| F                                    | -0.29061  | -4.78409 | -1.61965 | H                                                          | -0.35010 | -3.18240 | -2.91100 |
| C                                    | 0.49474   | -1.90487 | 3.78194  | H                                                          | 3.55443  | 2.07371  | -3.52433 |
| F                                    | 1.07543   | -3.04805 | 4.22881  | H                                                          | 3.44418  | 2.69481  | 3.04595  |
| F                                    | 0.81902   | -0.89282 | 4.65473  | H                                                          | 0.40509  | -1.18852 | 4.30027  |
| H                                    | -1.71173  | -3.39554 | -1.29572 | H                                                          | 4.00964  | 3.42023  | 1.51820  |
| H                                    | 4.08107   | -0.11648 | -4.08446 | H                                                          | -0.37349 | -2.51439 | 3.39675  |
| H                                    | 3.82307   | 2.57717  | 2.67897  | H                                                          | 2.72162  | 0.74753  | -4.37855 |
| H                                    | -0.59237  | -2.02484 | 3.77756  | H                                                          | -0.89764 | -3.76348 | -1.31644 |
| Rh <sub>2</sub> (PhCOO) <sub>4</sub> |           |          |          | Rh <sub>2</sub> (2,4,6-Cl <sub>3</sub> PhCOO) <sub>4</sub> |          |          |          |
| C                                    | 1.92334   | 1.84420  | 0.00000  | C                                                          | -0.18026 | 2.81360  | 0.44800  |
| C                                    | 1.49635   | 1.43455  | 1.13456  | O                                                          | 0.22815  | 1.79168  | -0.18624 |
| O                                    | 1.49566   | 1.43523  | -1.13452 | O                                                          | -1.18484 | 2.86991  | 1.22551  |
| Rh                                   | 0.00004   | -0.00002 | -1.19545 | Rh                                                         | -2.36319 | 1.17726  | 1.40850  |
| Rh                                   | 0.00005   | 0.00001  | 1.19541  | Rh                                                         | -0.85573 | 0.00703  | -0.04765 |
| C                                    | 1.84423   | -1.92331 | -0.00002 | C                                                          | -2.98991 | 1.41875  | -1.43249 |
| O                                    | 1.43461   | -1.49628 | 1.13454  | O                                                          | -2.02486 | 0.61678  | -1.64776 |
| O                                    | 1.43525   | -1.49568 | -1.13455 | O                                                          | -3.39152 | 1.80700  | -0.28951 |
| C                                    | -1.84415  | 1.92329  | 0.00001  | C                                                          | -0.22909 | -0.23460 | 2.79334  |
| O                                    | -1.43448  | 1.49631  | 1.13457  | O                                                          | 0.17272  | -0.62257 | 1.65033  |
| O                                    | -1.43520  | 1.49562  | -1.13451 | O                                                          | -1.19431 | 0.56715  | 3.00866  |
| C                                    | -1.92331  | -1.84415 | -0.00002 | C                                                          | -3.03877 | -1.62923 | 0.91274  |
| O                                    | -1.49633  | -1.43448 | 1.13453  | O                                                          | -2.03405 | -1.68559 | 0.13540  |
| O                                    | -1.49556  | -1.43529 | -1.13456 | O                                                          | -3.44715 | -0.60730 | 1.54700  |
| C                                    | -3.00132  | -2.87646 | -0.00000 | C                                                          | -3.80505 | -2.91459 | 1.10629  |
| C                                    | -3.51035  | -3.36300 | 1.21540  | C                                                          | -3.23887 | -4.00117 | 1.79466  |
| C                                    | -3.50964  | -3.36378 | -1.21540 | C                                                          | -5.10561 | -3.07819 | 0.60255  |
| C                                    | -4.51925  | -4.32865 | 1.21330  | C                                                          | -3.93598 | -5.19349 | 1.99529  |
| C                                    | -4.51853  | -4.32943 | -1.21329 | C                                                          | -5.82545 | -4.26075 | 0.77779  |
| C                                    | -5.02465  | -4.81307 | 0.00001  | C                                                          | -5.22755 | -5.30594 | 1.48126  |
| H                                    | -3.11119  | -2.98034 | 2.14997  | H                                                          | -3.47803 | -6.01284 | 2.53975  |
| H                                    | -3.10993  | -2.98170 | -2.14998 | H                                                          | -6.82625 | -4.36088 | 0.37047  |
| H                                    | -4.91184  | -4.70384 | 2.15575  | C                                                          | -3.70283 | 1.96343  | -2.64326 |
| H                                    | -4.91056  | -4.70522 | -2.15573 | C                                                          | -5.10998 | 2.08225  | -2.69481 |
| H                                    | -5.81070  | -5.56538 | 0.00002  | C                                                          | -2.99001 | 2.39339  | -3.78714 |
| C                                    | 2.87656   | -3.00130 | 0.00001  | C                                                          | -5.77488 | 2.58078  | -3.81620 |
| C                                    | 3.36367   | -3.50983 | -1.21539 | C                                                          | -3.63508 | 2.90970  | -4.91256 |
| C                                    | 3.36334   | -3.51009 | 1.21542  | C                                                          | -5.02531 | 2.99237  | -4.91555 |
| C                                    | 4.32934   | -4.51869 | -1.21327 | H                                                          | -6.85793 | 2.64387  | -3.82514 |
| C                                    | 4.32902   | -4.51896 | 1.21333  | H                                                          | -3.05610 | 3.24234  | -5.76765 |
| C                                    | 4.81323   | -5.02457 | 0.00004  | C                                                          | 0.58590  | 4.09902  | 0.25421  |
| H                                    | 2.98141   | -3.11030 | -2.14997 | C                                                          | 0.01976  | 5.18531  | -0.43463 |
| H                                    | 2.98084   | -3.11078 | 2.14998  | C                                                          | 1.88633  | 4.26291  | 0.75815  |
| H                                    | 4.70497   | -4.91089 | -2.15571 | C                                                          | 0.71682  | 6.37760  | -0.63558 |
| H                                    | 4.70440   | -4.91135 | 2.15577  | C                                                          | 2.60614  | 5.44543  | 0.58259  |

|                                            |          |          |          |                                                                  |          |          |          |
|--------------------------------------------|----------|----------|----------|------------------------------------------------------------------|----------|----------|----------|
| H                                          | 5.56557  | -5.81060 | 0.00005  | C                                                                | 2.00831  | 6.49031  | -0.12139 |
| C                                          | 3.00129  | 2.87656  | -0.00000 | H                                                                | 0.25890  | 7.19673  | -1.18037 |
| C                                          | 3.50945  | 3.36402  | -1.21541 | H                                                                | 3.60686  | 5.54578  | 0.99006  |
| C                                          | 3.51042  | 3.36303  | 1.21539  | C                                                                | 0.48396  | -0.77919 | 4.00407  |
| C                                          | 4.51827  | 4.32974  | -1.21332 | C                                                                | 1.89114  | -0.89757 | 4.05566  |
| C                                          | 4.51925  | 4.32875  | 1.21328  | C                                                                | -0.22875 | -1.20953 | 5.14787  |
| C                                          | 5.02449  | 4.81331  | -0.00002 | C                                                                | 2.55618  | -1.39599 | 5.17702  |
| H                                          | 3.10967  | 2.98200  | -2.14998 | C                                                                | 0.41645  | -1.72569 | 6.27328  |
| H                                          | 3.11141  | 2.98024  | 2.14997  | C                                                                | 1.80671  | -1.80790 | 6.27632  |
| H                                          | 4.91017  | 4.70565  | -2.15576 | H                                                                | 3.63925  | -1.45874 | 5.18599  |
| H                                          | 4.91192  | 4.70387  | 2.15571  | H                                                                | -0.16245 | -2.05859 | 7.12833  |
| H                                          | 5.81049  | 5.56567  | -0.00003 | Cl                                                               | 2.91947  | -0.38932 | 2.73293  |
| C                                          | -2.87655 | 3.00121  | 0.00003  | Cl                                                               | -1.97764 | -1.18555 | 5.22952  |
| C                                          | -3.36339 | 3.50996  | 1.21543  | Cl                                                               | 2.62668  | -2.44328 | 7.68521  |
| C                                          | -3.36369 | 3.50971  | -1.21537 | Cl                                                               | -1.61973 | -3.89234 | 2.45206  |
| C                                          | -4.32914 | 4.51876  | 1.21334  | Cl                                                               | -5.85934 | -1.79161 | -0.31176 |
| C                                          | -4.32943 | 4.51850  | -1.21326 | Cl                                                               | -6.11624 | -6.79584 | 1.71979  |
| C                                          | -4.81338 | 5.02434  | 0.00005  | Cl                                                               | -1.24114 | 2.36877  | -3.86889 |
| H                                          | -2.98089 | 3.11066  | 2.15001  | Cl                                                               | -6.13841 | 1.57436  | -1.37204 |
| H                                          | -2.98139 | 3.11021  | -2.14994 | Cl                                                               | -5.84512 | 3.62797  | -6.32443 |
| H                                          | -4.70456 | 4.91112  | 2.15579  | Cl                                                               | 2.63994  | 2.97669  | 1.67307  |
| H                                          | -4.70508 | 4.91067  | -2.15570 | Cl                                                               | -1.59934 | 5.07613  | -1.09207 |
| H                                          | -5.56577 | 5.81031  | 0.00006  | Cl                                                               | 2.89694  | 7.98018  | -0.36036 |
| TS2(Rh <sub>2</sub> (PhCOO) <sub>4</sub> ) |          |          |          | TS2(Rh <sub>2</sub> (2,4,6-Cl <sub>3</sub> PhCOO) <sub>4</sub> ) |          |          |          |
| C                                          | -0.22648 | 2.85000  | 0.55116  | C                                                                | -1.52234 | 0.85750  | -1.93043 |
| O                                          | 0.26208  | 1.84012  | -0.07164 | O                                                                | -1.47205 | 0.50171  | -0.70759 |
| O                                          | -1.34196 | 2.86878  | 1.16549  | O                                                                | -0.55575 | 0.91509  | -2.74485 |
| Rh                                         | -2.49320 | 1.13449  | 1.28768  | Rh                                                               | 1.32219  | 0.24262  | -2.12132 |
| Rh                                         | -0.76140 | 0.03265  | -0.03992 | Rh                                                               | 0.38182  | 0.07135  | 0.14541  |
| C                                          | -2.92389 | 1.28150  | -1.60909 | C                                                                | 1.44213  | 2.70745  | -0.56578 |
| O                                          | -1.83419 | 0.61459  | -1.74122 | O                                                                | 0.75965  | 2.11783  | 0.33681  |
| O                                          | -3.43984 | 1.63438  | -0.50224 | O                                                                | 1.86946  | 2.20427  | -1.64334 |
| C                                          | -0.34922 | -0.07781 | 2.87190  | C                                                                | 0.31697  | -2.40423 | -1.42247 |
| O                                          | 0.17898  | -0.44741 | 1.76248  | O                                                                | 0.10835  | -1.97147 | -0.24064 |
| O                                          | -1.44181 | 0.56629  | 2.98854  | O                                                                | 0.71975  | -1.73241 | -2.41619 |
| C                                          | -3.01852 | -1.69123 | 0.76067  | C                                                                | 3.24768  | -0.54178 | -0.09036 |
| O                                          | -1.91199 | -1.70982 | 0.11601  | O                                                                | 2.34241  | -0.34036 | 0.78134  |
| O                                          | -3.52491 | -0.67296 | 1.33476  | O                                                                | 3.13498  | -0.44269 | -1.34643 |
| N                                          | 1.07395  | 0.25877  | -2.49904 | N                                                                | -0.86081 | 1.50086  | 2.66948  |
| N                                          | 0.79698  | 1.02899  | -3.24948 | N                                                                | -0.66126 | 2.58651  | 2.78812  |
| C                                          | 0.81179  | -0.97985 | -1.24531 | C                                                                | -0.57268 | -0.19594 | 2.14396  |
| C                                          | 2.04982  | -0.88105 | -0.48812 | C                                                                | -1.94958 | -0.62052 | 1.88256  |
| N                                          | 3.03189  | -0.10358 | -0.79168 | N                                                                | -2.97930 | 0.11306  | 2.11364  |
| H                                          | 2.03885  | -1.49156 | 0.42430  | H                                                                | -2.01492 | -1.60905 | 1.40749  |
| C                                          | -0.74366 | -2.40411 | -2.59767 | C                                                                | 1.45455  | -0.38578 | 3.60747  |
| C                                          | -1.02115 | -3.57434 | -3.30228 | C                                                                | 2.13348  | -0.96573 | 4.67617  |
| C                                          | 0.51892  | -2.21840 | -1.99571 | C                                                                | 0.15222  | -0.81290 | 3.27234  |
| H                                          | -1.99516 | -3.70542 | -3.76789 | H                                                                | 3.13135  | -0.61848 | 4.93328  |
| C                                          | -0.05647 | -4.58650 | -3.39643 | C                                                                | 1.54268  | -2.00569 | 5.40634  |
| C                                          | 1.49061  | -3.23621 | -2.11708 | C                                                                | -0.44427 | -1.84191 | 4.03466  |
| H                                          | -0.28112 | -5.50341 | -3.93731 | H                                                                | 2.08224  | -2.46727 | 6.23051  |
| H                                          | 2.47654  | -3.10423 | -1.67819 | H                                                                | -1.45299 | -2.17766 | 3.80923  |
| C                                          | 1.19804  | -4.41862 | -2.79700 | C                                                                | 0.25622  | -2.44832 | 5.07753  |
| H                                          | 1.94898  | -5.20164 | -2.87114 | H                                                                | -0.20703 | -3.25290 | 5.64365  |
| H                                          | -1.49571 | -1.62802 | -2.50633 | H                                                                | 1.92513  | 0.40137  | 3.02901  |
| S                                          | 4.29672  | -0.01473 | 0.37427  | S                                                                | -4.49325 | -0.51275 | 1.56318  |
| O                                          | 4.07291  | -0.97303 | 1.47330  | O                                                                | -4.35472 | -1.91266 | 1.12337  |
| O                                          | 4.46903  | 1.41279  | 0.66624  | O                                                                | -5.04035 | 0.49575  | 0.65042  |
| C                                          | 5.69037  | -0.58552 | -0.59820 | C                                                                | -5.42405 | -0.48489 | 3.09416  |
| C                                          | 6.17429  | -1.88194 | -0.41016 | C                                                                | -5.64348 | -1.67718 | 3.78688  |
| C                                          | 6.28166  | 0.28316  | -1.52242 | C                                                                | -5.93236 | 0.73202  | 3.56286  |
| C                                          | 7.26603  | -2.31346 | -1.16941 | C                                                                | -6.37964 | -1.64352 | 4.97508  |
| C                                          | 7.36780  | -0.16749 | -2.27248 | C                                                                | -6.66128 | 0.74479  | 4.75164  |
| C                                          | 7.87757  | -1.46851 | -2.10907 | C                                                                | -6.89719 | -0.43846 | 5.47549  |
| H                                          | 5.71405  | -2.53534 | 0.32597  | H                                                                | -5.25726 | -2.61483 | 3.39664  |
| H                                          | 5.90375  | 1.29457  | -1.64513 | H                                                                | -5.76704 | 1.64827  | 3.00244  |
| H                                          | 7.64869  | -3.32140 | -1.02134 | H                                                                | -6.55663 | -2.57168 | 5.51490  |

|                                                 |          |          |          |                                                               |          |          |          |
|-------------------------------------------------|----------|----------|----------|---------------------------------------------------------------|----------|----------|----------|
| H                                               | 7.82983  | 0.50478  | -2.99319 | H                                                             | -7.05769 | 1.68909  | 5.12049  |
| C                                               | 9.07538  | -1.92906 | -2.90820 | C                                                             | -7.71420 | -0.40841 | 6.74709  |
| H                                               | 9.17041  | -3.01854 | -2.89909 | H                                                             | -7.59477 | -1.32961 | 7.32419  |
| H                                               | 9.01005  | -1.59962 | -3.95021 | H                                                             | -7.42744 | 0.43435  | 7.38458  |
| H                                               | 10.00092 | -1.51184 | -2.49284 | H                                                             | -8.78106 | -0.29475 | 6.51918  |
| C                                               | -3.77947 | -2.97800 | 0.84077  | C                                                             | 4.60573  | -0.93864 | 0.44006  |
| C                                               | -3.26049 | -4.14657 | 0.25994  | C                                                             | 4.80206  | -2.14932 | 1.12729  |
| C                                               | -5.01826 | -3.02008 | 1.50129  | C                                                             | 5.72926  | -0.11241 | 0.26062  |
| C                                               | -3.97452 | -5.34471 | 0.34027  | C                                                             | 6.05449  | -2.53215 | 1.61157  |
| C                                               | -5.73071 | -4.21910 | 1.57797  | C                                                             | 6.99178  | -0.46180 | 0.74366  |
| C                                               | -5.21042 | -5.38331 | 0.99827  | C                                                             | 7.13669  | -1.67562 | 1.41405  |
| H                                               | -2.30082 | -4.10567 | -0.24613 | H                                                             | 6.17833  | -3.47913 | 2.12666  |
| H                                               | -5.41042 | -2.11171 | 1.94886  | H                                                             | 7.83870  | 0.20067  | 0.59761  |
| H                                               | -3.56789 | -6.24888 | -0.10768 | C                                                             | 1.76430  | 4.16080  | -0.31344 |
| H                                               | -6.68996 | -4.24727 | 2.09017  | C                                                             | 1.34126  | 5.16812  | -1.20149 |
| H                                               | -5.76539 | -6.31721 | 1.06040  | C                                                             | 2.50298  | 4.56984  | 0.81133  |
| C                                               | -3.64215 | 1.67085  | -2.86298 | C                                                             | 1.62698  | 6.51706  | -0.98135 |
| C                                               | -4.85344 | 2.37741  | -2.78147 | C                                                             | 2.81551  | 5.90870  | 1.05083  |
| C                                               | -3.11675 | 1.33730  | -4.12192 | C                                                             | 2.36588  | 6.86984  | 0.14657  |
| C                                               | -5.53082 | 2.74380  | -3.94661 | H                                                             | 1.27731  | 7.27189  | -1.67806 |
| C                                               | -3.79558 | 1.70587  | -5.28587 | H                                                             | 3.39860  | 6.19022  | 1.92146  |
| C                                               | -5.00374 | 2.40914  | -5.20048 | C                                                             | -2.88582 | 1.24505  | -2.44580 |
| H                                               | -5.25211 | 2.63253  | -1.80420 | C                                                             | -3.56433 | 2.37137  | -1.95200 |
| H                                               | -2.17835 | 0.79472  | -4.18051 | C                                                             | -3.53479 | 0.48477  | -3.43324 |
| H                                               | -6.46863 | 3.29063  | -3.87825 | C                                                             | -4.82643 | 2.73966  | -2.41801 |
| H                                               | -3.38339 | 1.44726  | -6.25879 | C                                                             | -4.80146 | 0.82028  | -3.91307 |
| H                                               | -5.53181 | 2.69621  | -6.10745 | C                                                             | -5.43058 | 1.95169  | -3.39595 |
| C                                               | 0.58759  | 4.10290  | 0.54848  | H                                                             | -5.32419 | 3.61835  | -2.02171 |
| C                                               | -0.00446 | 5.32181  | 0.91852  | H                                                             | -5.28345 | 0.20804  | -4.66810 |
| C                                               | 1.94554  | 4.06336  | 0.19216  | C                                                             | 0.06982  | -3.87505 | -1.65924 |
| C                                               | 0.75233  | 6.49546  | 0.91507  | C                                                             | -1.18930 | -4.46177 | -1.43176 |
| C                                               | 2.70186  | 5.23819  | 0.20411  | C                                                             | 1.09367  | -4.71760 | -2.13427 |
| C                                               | 2.10677  | 6.45531  | 0.55858  | C                                                             | -1.42900 | -5.81665 | -1.67227 |
| H                                               | -1.05251 | 5.33814  | 1.20322  | C                                                             | 0.88544  | -6.07794 | -2.36871 |
| H                                               | 2.40723  | 3.11538  | -0.06631 | C                                                             | -0.38189 | -6.60989 | -2.13674 |
| H                                               | 0.28954  | 7.43952  | 1.19433  | H                                                             | -2.41462 | -6.23680 | -1.50055 |
| H                                               | 3.75733  | 5.20183  | -0.05612 | H                                                             | 1.69739  | -6.70362 | -2.72443 |
| H                                               | 2.69764  | 7.36911  | 0.56366  | Cl                                                            | -2.53923 | -3.50856 | -0.86061 |
| C                                               | 0.37656  | -0.43824 | 4.12813  | Cl                                                            | 2.70941  | -4.10671 | -2.42200 |
| C                                               | 1.70415  | -0.89413 | 4.08044  | Cl                                                            | -0.66350 | -8.31376 | -2.43517 |
| C                                               | -0.27503 | -0.31105 | 5.36650  | Cl                                                            | 3.47257  | -3.26037 | 1.37788  |
| C                                               | 2.37065  | -1.21998 | 5.26474  | Cl                                                            | 5.58240  | 1.42768  | -0.55937 |
| C                                               | 0.39159  | -0.64945 | 6.54590  | Cl                                                            | 8.71488  | -2.13546 | 2.02181  |
| C                                               | 1.71605  | -1.10377 | 6.49709  | Cl                                                            | 3.11812  | 3.39798  | 1.96241  |
| H                                               | 2.21847  | -0.97191 | 3.12771  | Cl                                                            | 0.39529  | 4.77822  | -2.62038 |
| H                                               | -1.29884 | 0.05020  | 5.39246  | Cl                                                            | 2.73970  | 8.55681  | 0.43398  |
| H                                               | 3.40318  | -1.55964 | 5.22431  | Cl                                                            | -2.78235 | -0.95648 | -4.08475 |
| H                                               | -0.11831 | -0.55597 | 7.50229  | Cl                                                            | -2.82419 | 3.39868  | -0.74206 |
| H                                               | 2.23708  | -1.36132 | 7.41709  | Cl                                                            | -7.01989 | 2.39353  | -3.98984 |
| TS2(Rh <sub>2</sub> (p-OMePhCOO) <sub>4</sub> ) |          |          |          | TS2(Rh <sub>2</sub> (p-NMe <sub>2</sub> PhCOO) <sub>4</sub> ) |          |          |          |
| C                                               | 0.65562  | -1.96689 | -1.96416 | C                                                             | -0.91762 | 1.90665  | -1.81264 |
| O                                               | 0.72386  | -1.51436 | -0.76339 | O                                                             | -0.87413 | 1.47990  | -0.59946 |
| O                                               | -0.23540 | -1.64977 | -2.81946 | O                                                             | -0.10975 | 1.56017  | -2.73924 |
| Rh                                              | -1.66976 | -0.21194 | -2.34762 | Rh                                                            | 1.37458  | 0.14545  | -2.35798 |
| Rh                                              | -0.63261 | -0.07042 | -0.14167 | Rh                                                            | 0.53885  | 0.05538  | -0.06893 |
| C                                               | -2.79380 | -2.06664 | -0.37150 | C                                                             | 2.66105  | 2.05554  | -0.53618 |
| O                                               | -1.95213 | -1.57788 | 0.46958  | O                                                             | 1.89700  | 1.58136  | 0.38643  |
| O                                               | -2.91235 | -1.70150 | -1.58495 | O                                                             | 2.66867  | 1.66320  | -1.74915 |
| C                                               | 0.49675  | 1.75016  | -2.16276 | C                                                             | -0.75587 | -1.82411 | -1.93365 |
| O                                               | 0.61498  | 1.40663  | -0.93007 | O                                                             | -0.76535 | -1.44758 | -0.70321 |
| O                                               | -0.36538 | 1.27944  | -2.97610 | O                                                             | 0.03365  | -1.37109 | -2.83000 |
| C                                               | -2.92430 | 1.74115  | -0.57185 | C                                                             | 2.80777  | -1.74803 | -0.65214 |
| O                                               | -2.05724 | 1.39650  | 0.30813  | O                                                             | 2.01222  | -1.38888 | 0.28982  |
| O                                               | -3.02654 | 1.24523  | -1.74242 | O                                                             | 2.79829  | -1.28167 | -1.84160 |
| N                                               | 0.50470  | -1.66332 | 2.23541  | N                                                             | -0.39766 | 1.71002  | 2.34719  |
| N                                               | 0.21781  | -2.73526 | 2.28211  | N                                                             | -0.10931 | 2.78266  | 2.32688  |
| C                                               | 0.30511  | 0.07058  | 1.87320  | C                                                             | -0.21841 | -0.03283 | 2.02078  |



|   |          |          |          |   |          |          |          |
|---|----------|----------|----------|---|----------|----------|----------|
| C | 1.68533  | 0.47728  | 1.66817  | C | -1.60636 | -0.45618 | 1.95331  |
| N | 2.70594  | -0.29792 | 1.81184  | N | -2.62097 | 0.31018  | 2.17277  |
| H | 1.77325  | 1.50914  | 1.30376  | H | -1.71363 | -1.49880 | 1.62665  |
| C | -1.83086 | 0.37006  | 3.14710  | C | 2.02413  | -0.28714 | 3.10829  |
| C | -2.54019 | 0.87909  | 4.23392  | C | 2.83045  | -0.76101 | 4.14230  |
| C | -0.44552 | 0.60909  | 3.02699  | C | 0.63492  | -0.53242 | 3.12045  |
| H | -3.60665 | 0.68432  | 4.32055  | H | 3.89963  | -0.56259 | 4.12557  |
| C | -1.88724 | 1.65325  | 5.20250  | C | 2.27099  | -1.50571 | 5.18912  |
| C | 0.20539  | 1.37249  | 4.02110  | C | 0.07966  | -1.26577 | 4.19209  |
| H | -2.44665 | 2.05778  | 6.04352  | H | 2.90573  | -1.88357 | 5.98807  |
| H | 1.27608  | 1.55070  | 3.95760  | H | -0.99151 | -1.44814 | 4.23016  |
| C | -0.51406 | 1.90520  | 5.09109  | C | 0.89446  | -1.76330 | 5.20943  |
| H | -0.00480 | 2.50337  | 5.84307  | H | 0.45738  | -2.33898 | 6.02203  |
| H | -2.33712 | -0.21215 | 2.38492  | H | 2.45690  | 0.27134  | 2.28556  |
| S | 4.21705  | 0.36010  | 1.31966  | S | -4.16096 | -0.38511 | 1.85828  |
| O | 4.07988  | 1.77478  | 0.92324  | O | -4.04376 | -1.81067 | 1.49617  |
| O | 4.79338  | -0.61246 | 0.38397  | O | -4.85490 | 0.54635  | 0.96175  |
| C | 5.12798  | 0.29327  | 2.86321  | C | -4.90481 | -0.28023 | 3.48865  |
| C | 5.32978  | 1.46618  | 3.59345  | C | -5.02526 | -1.43391 | 4.26549  |
| C | 5.63426  | -0.93362 | 3.30702  | C | -5.36637 | 0.95698  | 3.95240  |
| C | 6.04619  | 1.40261  | 4.79253  | C | -5.61272 | -1.34065 | 5.53129  |
| C | 6.34338  | -0.97684 | 4.50726  | C | -5.94566 | 1.03037  | 5.21895  |
| C | 6.56160  | 0.18647  | 5.26783  | C | -6.07902 | -0.11338 | 6.02746  |
| H | 4.94477  | 2.41257  | 3.22363  | H | -4.67710 | -2.38877 | 3.88112  |
| H | 5.48214  | -1.83489 | 2.71933  | H | -5.27959 | 1.84311  | 3.32942  |
| H | 6.20929  | 2.31609  | 5.36111  | H | -5.71224 | -2.23962 | 6.13654  |
| H | 6.73754  | -1.92954 | 4.85643  | H | -6.30389 | 1.99151  | 5.58359  |
| C | 7.35837  | 0.12520  | 6.55116  | C | -6.73458 | -0.01873 | 7.38667  |
| H | 8.43091  | 0.04100  | 6.33734  | H | -7.82124 | 0.09192  | 7.28662  |
| H | 7.21146  | 1.02219  | 7.15931  | H | -6.54627 | -0.91302 | 7.98736  |
| H | 7.07841  | -0.74572 | 7.15273  | H | -6.37050 | 0.85038  | 7.94453  |
| C | -3.89202 | 2.80828  | -0.19071 | C | 3.81950  | -2.78470 | -0.32635 |
| C | -3.81604 | 3.43161  | 1.06172  | C | 3.86955  | -3.37867 | 0.94586  |
| C | -4.89804 | 3.21084  | -1.09025 | C | 4.75180  | -3.20727 | -1.28906 |
| C | -4.71671 | 4.43740  | 1.42302  | C | 4.81267  | -4.35341 | 1.25210  |
| C | -5.80120 | 4.20674  | -0.74281 | C | 5.70270  | -4.17833 | -0.99773 |
| C | -5.71671 | 4.82931  | 0.51745  | C | 5.76793  | -4.77667 | 0.28932  |
| H | -3.04022 | 3.12693  | 1.75767  | H | 3.14995  | -3.07239 | 1.69956  |
| H | -4.96033 | 2.73287  | -2.06332 | H | 4.72161  | -2.76548 | -2.28104 |
| H | -4.62777 | 4.90354  | 2.39884  | H | 4.80242  | -4.78943 | 2.24501  |
| H | -6.58125 | 4.52421  | -1.43030 | H | 6.39573  | -4.47379 | -1.77766 |
| C | -3.70069 | -3.14318 | 0.11594  | C | 3.60254  | 3.13606  | -0.15236 |
| C | -4.66373 | -3.70182 | -0.74719 | C | 4.48390  | 3.68611  | -1.09940 |
| C | -3.61547 | -3.62172 | 1.42995  | C | 3.64160  | 3.64604  | 1.15633  |
| C | -5.51374 | -4.70640 | -0.30510 | C | 5.37301  | 4.69801  | -0.75875 |
| C | -4.46362 | -4.63328 | 1.88831  | C | 4.52411  | 4.65884  | 1.51383  |
| C | -5.42024 | -5.18129 | 1.01747  | C | 5.42672  | 5.21135  | 0.56546  |
| H | -4.73454 | -3.33705 | -1.76747 | H | 4.46261  | 3.31021  | -2.11831 |
| H | -2.87355 | -3.20065 | 2.10150  | H | 2.96204  | 3.24422  | 1.90212  |
| H | -6.25959 | -5.14307 | -0.96455 | H | 6.02791  | 5.09176  | -1.52814 |
| H | -4.36850 | -4.98261 | 2.91116  | H | 4.50835  | 5.02324  | 2.53509  |
| C | 1.70407  | -2.93622 | -2.38042 | C | -1.98878 | 2.87430  | -2.14878 |
| C | 1.54827  | -3.68897 | -3.56042 | C | -1.98593 | 3.54878  | -3.38149 |
| C | 2.86964  | -3.09797 | -1.61923 | C | -3.04632 | 3.12540  | -1.25795 |
| C | 2.52602  | -4.59181 | -3.95661 | C | -2.98651 | 4.45549  | -3.71075 |
| C | 3.86671  | -3.99296 | -2.01587 | C | -4.05950 | 4.02143  | -1.57865 |
| C | 3.69474  | -4.74932 | -3.18665 | C | -4.05264 | 4.72668  | -2.81151 |
| H | 0.65175  | -3.55814 | -4.15941 | H | -1.18461 | 3.35306  | -4.08856 |
| H | 3.01303  | -2.50102 | -0.72377 | H | -3.08740 | 2.58905  | -0.31473 |
| H | 2.41308  | -5.18322 | -4.86182 | H | -2.93969 | 4.94969  | -4.67485 |
| H | 4.76591  | -4.07978 | -1.41508 | H | -4.86710 | 4.16027  | -0.86868 |
| C | 1.43976  | 2.77964  | -2.67731 | C | -1.73429 | -2.86263 | -2.33675 |
| C | 2.56506  | 3.16145  | -1.93426 | C | -2.77611 | -3.25884 | -1.48052 |
| C | 1.21796  | 3.37561  | -3.93425 | C | -1.65590 | -3.46198 | -3.60573 |
| C | 3.45706  | 4.11928  | -2.42399 | C | -3.70068 | -4.22103 | -1.87068 |
| C | 2.09085  | 4.33717  | -4.42536 | C | -2.56729 | -4.43253 | -4.00448 |
| C | 3.21932  | 4.71603  | -3.67274 | C | -3.61618 | -4.84927 | -3.14147 |

|                                           |          |          |          |                                                         |          |          |          |
|-------------------------------------------|----------|----------|----------|---------------------------------------------------------|----------|----------|----------|
| H                                         | 2.76588  | 2.69405  | -0.97538 | H                                                       | -2.88428 | -2.78885 | -0.50785 |
| H                                         | 0.35235  | 3.07653  | -4.51788 | H                                                       | -0.86631 | -3.15558 | -4.28605 |
| H                                         | 4.32682  | 4.37968  | -1.82999 | H                                                       | -4.49960 | -4.47285 | -1.18221 |
| H                                         | 1.92496  | 4.80751  | -5.39138 | H                                                       | -2.46407 | -4.86316 | -4.99438 |
| O                                         | 4.02038  | 5.66450  | -4.24274 | N                                                       | -4.51636 | -5.83114 | -3.52257 |
| C                                         | 5.18942  | 6.07944  | -3.53387 | N                                                       | 6.72726  | -5.72680 | 0.59462  |
| H                                         | 4.93126  | 6.53234  | -2.56888 | N                                                       | 6.32403  | 6.20203  | 0.91763  |
| H                                         | 5.87778  | 5.24088  | -3.37405 | N                                                       | -5.04226 | 5.64473  | -3.12320 |
| H                                         | 5.67049  | 6.82699  | -4.16700 | C                                                       | 6.64749  | -6.45316 | 1.85645  |
| O                                         | -6.64722 | 5.79805  | 0.76290  | H                                                       | 7.48882  | -7.14463 | 1.92699  |
| C                                         | -6.60815 | 6.47594  | 2.01972  | H                                                       | 6.71259  | -5.76992 | 2.71131  |
| H                                         | -6.76451 | 5.78056  | 2.85344  | H                                                       | 5.71758  | -7.03426 | 1.95092  |
| H                                         | -5.65900 | 7.00809  | 2.15676  | C                                                       | 7.56664  | -6.27179 | -0.46640 |
| H                                         | -7.42640 | 7.19750  | 1.99317  | H                                                       | 8.15871  | -5.48411 | -0.94650 |
| O                                         | -6.29778 | -6.17022 | 1.35484  | H                                                       | 8.26690  | -6.99042 | -0.03723 |
| C                                         | -6.24949 | -6.70061 | 2.68092  | H                                                       | 6.98227  | -6.78542 | -1.24472 |
| H                                         | -5.27522 | -7.15762 | 2.89225  | C                                                       | 7.12245  | 6.85677  | -0.11242 |
| H                                         | -6.46408 | -5.92686 | 3.42798  | H                                                       | 7.77688  | 7.59445  | 0.35470  |
| H                                         | -7.02487 | -7.46730 | 2.72185  | H                                                       | 7.76093  | 6.13648  | -0.63740 |
| O                                         | 4.59998  | -5.65471 | -3.66328 | H                                                       | 6.50179  | 7.37423  | -0.85901 |
| C                                         | 5.81480  | -5.84627 | -2.93606 | C                                                       | 6.24318  | 6.81777  | 2.23686  |
| H                                         | 6.39850  | -4.91941 | -2.88311 | H                                                       | 5.27833  | 7.31795  | 2.40850  |
| H                                         | 5.61895  | -6.21614 | -1.92220 | H                                                       | 6.39078  | 6.07623  | 3.03112  |
| H                                         | 6.37814  | -6.59749 | -3.49232 | H                                                       | 7.03364  | 7.56356  | 2.33490  |
|                                           |          |          |          | C                                                       | -6.22183 | 5.74724  | -2.27135 |
|                                           |          |          |          | H                                                       | -6.79465 | 4.80851  | -2.22706 |
|                                           |          |          |          | H                                                       | -5.94612 | 6.02836  | -1.24857 |
|                                           |          |          |          | H                                                       | -6.87752 | 6.52901  | -2.65894 |
|                                           |          |          |          | C                                                       | -5.12163 | 6.18574  | -4.47527 |
|                                           |          |          |          | H                                                       | -5.94895 | 6.89553  | -4.52994 |
|                                           |          |          |          | H                                                       | -4.20674 | 6.72916  | -4.73785 |
|                                           |          |          |          | H                                                       | -5.28793 | 5.40567  | -5.23381 |
|                                           |          |          |          | C                                                       | -4.53139 | -6.29581 | -4.90488 |
|                                           |          |          |          | H                                                       | -5.29071 | -7.07217 | -5.01444 |
|                                           |          |          |          | H                                                       | -4.75855 | -5.49011 | -5.61967 |
|                                           |          |          |          | H                                                       | -3.56836 | -6.73887 | -5.18322 |
|                                           |          |          |          | C                                                       | -5.69403 | -6.08459 | -2.70005 |
|                                           |          |          |          | H                                                       | -6.27226 | -6.89786 | -3.14234 |
|                                           |          |          |          | H                                                       | -5.40882 | -6.39740 | -1.68926 |
|                                           |          |          |          | H                                                       | -6.34845 | -5.20375 | -2.61504 |
| Rh <sub>2</sub> (p-OMePhCOO) <sub>4</sub> |          |          |          | Rh <sub>2</sub> (p-NMe <sub>2</sub> PhCOO) <sub>4</sub> |          |          |          |
| C                                         | -1.82418 | -2.07845 | 0.14741  | C                                                       | 1.89735  | -1.87900 | -0.00030 |
| O                                         | -1.33492 | -1.64368 | 1.24886  | O                                                       | 1.49612  | -1.43549 | 1.13531  |
| O                                         | -1.49851 | -1.65048 | -1.01574 | O                                                       | 1.44990  | -1.48233 | -1.13594 |
| Rh                                        | -0.08123 | -0.14569 | -1.18204 | Rh                                                      | -0.00005 | 0.00005  | -1.19415 |
| Rh                                        | 0.08927  | -0.13721 | 1.20148  | Rh                                                      | 0.00000  | 0.00011  | 1.19340  |
| C                                         | -1.92720 | 1.69367  | 0.14077  | C                                                       | -1.88194 | -1.89446 | -0.00017 |
| O                                         | -1.41589 | 1.28901  | 1.24370  | O                                                       | -1.43650 | -1.49521 | 1.13536  |
| O                                         | -1.57851 | 1.28044  | -1.02107 | O                                                       | -1.48325 | -1.44902 | -1.13588 |
| C                                         | 1.93520  | -1.97660 | -0.12131 | C                                                       | 1.88191  | 1.89461  | -0.00038 |
| O                                         | 1.58682  | -1.56304 | 1.04052  | O                                                       | 1.43651  | 1.49542  | 1.13520  |
| O                                         | 1.42365  | -1.57222 | -1.22421 | O                                                       | 1.48316  | 1.44911  | -1.13605 |
| C                                         | 1.83206  | 1.79570  | -0.12796 | C                                                       | -1.89739 | 1.87917  | -0.00031 |
| O                                         | 1.50625  | 1.36785  | 1.03517  | O                                                       | -1.49611 | 1.43571  | 1.13530  |
| O                                         | 1.34318  | 1.36056  | -1.22946 | O                                                       | -1.45000 | 1.48243  | -1.13595 |
| C                                         | -3.00200 | 2.71639  | 0.21522  | C                                                       | -2.94892 | 2.92041  | -0.00017 |
| C                                         | -3.59814 | 3.20823  | -0.95409 | C                                                       | -3.49455 | 3.39708  | 1.20448  |
| C                                         | -3.43817 | 3.20786  | 1.46119  | C                                                       | -3.43489 | 3.45772  | -1.20484 |
| C                                         | -4.60882 | 4.17035  | -0.89761 | C                                                       | -4.48364 | 4.37258  | 1.21308  |
| C                                         | -4.44217 | 4.16397  | 1.53100  | C                                                       | -4.42262 | 4.43463  | -1.21326 |
| C                                         | -5.03604 | 4.65331  | 0.35107  | C                                                       | -4.97415 | 4.92883  | 0.00023  |
| H                                         | -3.26506 | 2.83256  | -1.91709 | H                                                       | -3.13518 | 2.98929  | 2.14504  |
| H                                         | -2.98046 | 2.83079  | 2.37087  | H                                                       | -3.02908 | 3.09715  | -2.14580 |
| H                                         | -5.04939 | 4.53088  | -1.82119 | H                                                       | -4.87677 | 4.70306  | 2.16812  |
| H                                         | -4.78670 | 4.54998  | 2.48707  | H                                                       | -4.76760 | 4.81401  | -2.16873 |
| C                                         | -2.84255 | -3.15713 | 0.22536  | C                                                       | -2.92854 | -2.94071 | 0.00004  |
| C                                         | -3.42374 | -3.67251 | -0.94137 | C                                                       | -3.47284 | -3.41938 | -1.20439 |

|                                                                  |          |          |          |                                                                        |          |          |          |
|------------------------------------------------------------------|----------|----------|----------|------------------------------------------------------------------------|----------|----------|----------|
| C                                                                | -3.23960 | -3.67858 | 1.47220  | C                                                                      | -3.41245 | -3.47943 | 1.20487  |
| C                                                                | -4.38217 | -4.68650 | -0.88138 | C                                                                      | -4.45888 | -4.39800 | -1.21258 |
| C                                                                | -4.19083 | -4.68696 | 1.54545  | C                                                                      | -4.39712 | -4.45944 | 1.21364  |
| C                                                                | -4.77012 | -5.19950 | 0.36814  | C                                                                      | -4.94736 | -4.95563 | 0.00041  |
| H                                                                | -3.12068 | -3.27381 | -1.90502 | H                                                                      | -3.11530 | -3.01033 | -2.14510 |
| H                                                                | -2.79334 | -3.28340 | 2.37988  | H                                                                      | -3.00788 | -3.11715 | 2.14570  |
| H                                                                | -4.81285 | -5.06373 | -1.80296 | H                                                                      | -4.85139 | -4.72951 | -2.16751 |
| H                                                                | -4.50445 | -5.09689 | 2.50219  | H                                                                      | -4.74091 | -4.83940 | 2.16929  |
| C                                                                | 3.00984  | -2.99948 | -0.19572 | C                                                                      | 2.94888  | -2.92025 | -0.00016 |
| C                                                                | 3.60576  | -3.49151 | 0.97362  | C                                                                      | 3.43477  | -3.45765 | -1.20482 |
| C                                                                | 3.44607  | -3.49096 | -1.44168 | C                                                                      | 3.49460  | -3.39682 | 1.20448  |
| C                                                                | 4.61626  | -4.45384 | 0.91719  | C                                                                      | 4.42249  | -4.43455 | -1.21323 |
| C                                                                | 4.44989  | -4.44724 | -1.51145 | C                                                                      | 4.48370  | -4.37231 | 1.21309  |
| C                                                                | 5.04353  | -4.93677 | -0.33146 | C                                                                      | 4.97410  | -4.92868 | 0.00026  |
| H                                                                | 3.27265  | -3.11585 | 1.93661  | H                                                                      | 3.02889  | -3.09715 | -2.14578 |
| H                                                                | 2.98852  | -3.11375 | -2.35139 | H                                                                      | 3.13532  | -2.98894 | 2.14504  |
| H                                                                | 5.05668  | -4.81446 | 1.84080  | H                                                                      | 4.76741  | -4.81401 | -2.16869 |
| H                                                                | 4.79449  | -4.83327 | -2.46748 | H                                                                      | 4.87692  | -4.70267 | 2.16813  |
| C                                                                | 2.85026  | 2.87452  | -0.20593 | C                                                                      | 2.92850  | 2.94085  | -0.00027 |
| C                                                                | 3.43140  | 3.38999  | 0.96078  | C                                                                      | 3.41247  | 3.47963  | 1.20452  |
| C                                                                | 3.24721  | 3.39606  | -1.45278 | C                                                                      | 3.47276  | 3.41947  | -1.20474 |
| C                                                                | 4.38960  | 4.40420  | 0.90081  | C                                                                      | 4.39714  | 4.45964  | 1.21320  |
| C                                                                | 4.19817  | 4.40467  | -1.52601 | C                                                                      | 4.45881  | 4.39808  | -1.21302 |
| C                                                                | 4.77736  | 4.91738  | -0.34870 | C                                                                      | 4.94734  | 4.95577  | -0.00008 |
| H                                                                | 3.12846  | 2.99122  | 1.92444  | H                                                                      | 3.00794  | 3.11741  | 2.14539  |
| H                                                                | 2.80106  | 3.00074  | -2.36046 | H                                                                      | 3.11518  | 3.01037  | -2.14541 |
| H                                                                | 4.82034  | 4.78137  | 1.82239  | H                                                                      | 4.74097  | 4.83964  | 2.16882  |
| H                                                                | 4.51171  | 4.81466  | -2.48275 | H                                                                      | 4.85128  | 4.72954  | -2.16798 |
| O                                                                | 6.01957  | -5.87338 | -0.50502 | N                                                                      | 5.91290  | 5.94345  | -0.00067 |
| C                                                                | 6.66295  | -6.40983 | 0.65349  | N                                                                      | -5.94281 | 5.91312  | 0.00116  |
| H                                                                | 7.17902  | -5.62638 | 1.22124  | N                                                                      | -5.91292 | -5.94333 | -0.00010 |
| H                                                                | 5.94665  | -6.92626 | 1.30365  | N                                                                      | 5.94268  | -5.91307 | 0.00115  |
| H                                                                | 7.39495  | -7.12757 | 0.27980  | C                                                                      | -6.58741 | 6.29834  | 1.25116  |
| O                                                                | -5.69355 | -6.18748 | 0.54506  | H                                                                      | -7.31089 | 7.09084  | 1.05374  |
| C                                                                | -6.31687 | -6.75270 | -0.61072 | H                                                                      | -7.12041 | 5.45956  | 1.72259  |
| H                                                                | -6.87939 | -5.99571 | -1.17022 | H                                                                      | -5.85861 | 6.68936  | 1.97143  |
| H                                                                | -5.57935 | -7.22667 | -1.26939 | C                                                                      | -6.52105 | 6.36617  | -1.25852 |
| H                                                                | -7.00593 | -7.51054 | -0.23455 | H                                                                      | -7.03051 | 5.55575  | -1.80040 |
| O                                                                | -6.01225 | 5.58973  | 0.52464  | H                                                                      | -7.25220 | 7.15066  | -1.05739 |
| C                                                                | -6.65561 | 6.12621  | -0.63386 | H                                                                      | -5.75503 | 6.79098  | -1.91845 |
| H                                                                | -5.93946 | 6.64323  | -1.28370 | C                                                                      | -6.56191 | -6.32470 | -1.24914 |
| H                                                                | -7.17113 | 5.34266  | -1.20196 | H                                                                      | -7.28134 | -7.12104 | -1.05228 |
| H                                                                | -7.38813 | 6.84340  | -0.26012 | H                                                                      | -7.10010 | -5.48570 | -1.71445 |
| O                                                                | 5.70042  | 5.90564  | -0.52572 | H                                                                      | -5.83478 | -6.70971 | -1.97413 |
| C                                                                | 6.32389  | 6.47097  | 0.62991  | C                                                                      | -6.49494 | -6.39158 | 1.25964  |
| H                                                                | 5.58637  | 6.94443  | 1.28898  | H                                                                      | -7.22239 | -7.17981 | 1.05960  |
| H                                                                | 6.88705  | 5.71421  | 1.18907  | H                                                                      | -5.73009 | -6.81048 | 1.92450  |
| H                                                                | 7.01236  | 7.22929  | 0.25361  | H                                                                      | -7.00932 | -5.58019 | 1.79555  |
|                                                                  |          |          |          | C                                                                      | 6.58776  | -6.29781 | 1.25108  |
|                                                                  |          |          |          | H                                                                      | 7.12137  | -5.45898 | 1.72179  |
|                                                                  |          |          |          | H                                                                      | 5.85913  | -6.68810 | 1.97187  |
|                                                                  |          |          |          | H                                                                      | 7.31077  | -7.09077 | 1.05377  |
|                                                                  |          |          |          | C                                                                      | 6.52152  | -6.36538 | -1.25853 |
|                                                                  |          |          |          | H                                                                      | 7.25268  | -7.14989 | -1.05750 |
|                                                                  |          |          |          | H                                                                      | 5.75583  | -6.78995 | -1.91897 |
|                                                                  |          |          |          | H                                                                      | 7.03109  | -5.55461 | -1.79980 |
|                                                                  |          |          |          | C                                                                      | 6.56183  | 6.32479  | -1.24976 |
|                                                                  |          |          |          | H                                                                      | 7.28127  | 7.12113  | -1.05296 |
|                                                                  |          |          |          | H                                                                      | 7.09997  | 5.48577  | -1.71508 |
|                                                                  |          |          |          | H                                                                      | 5.83465  | 6.70979  | -1.97471 |
|                                                                  |          |          |          | C                                                                      | 6.49495  | 6.39180  | 1.25903  |
|                                                                  |          |          |          | H                                                                      | 7.22239  | 7.18002  | 1.05891  |
|                                                                  |          |          |          | H                                                                      | 5.73011  | 6.81075  | 1.92386  |
|                                                                  |          |          |          | H                                                                      | 7.00933  | 5.58045  | 1.79499  |
| Rh <sub>2</sub> (C <sub>6</sub> F <sub>5</sub> COO) <sub>4</sub> |          |          |          | TS2(Rh <sub>2</sub> (C <sub>6</sub> F <sub>5</sub> COO) <sub>4</sub> ) |          |          |          |
| C                                                                | -1.87626 | -1.86279 | -0.11121 | C                                                                      | -0.22648 | 2.85000  | 0.55116  |
| O                                                                | -1.47504 | -1.52465 | 1.04693  | O                                                                      | 0.26208  | 1.84012  | -0.07164 |

|    |          |          |          |    |          |          |          |
|----|----------|----------|----------|----|----------|----------|----------|
| O  | -1.46289 | -1.40061 | -1.22187 | O  | -1.34196 | 2.86878  | 1.16549  |
| Rh | -0.00005 | 0.07304  | -1.19967 | Rh | -2.49320 | 1.13449  | 1.28768  |
| Rh | -0.00003 | -0.07307 | 1.19965  | Rh | -0.76140 | 0.03265  | -0.03992 |
| C  | -1.87766 | 1.86136  | 0.11127  | C  | -2.92389 | 1.28150  | -1.60909 |
| O  | -1.46392 | 1.39951  | 1.22194  | O  | -1.83419 | 0.61459  | -1.74122 |
| O  | -1.47620 | 1.52350  | -1.04686 | O  | -3.43984 | 1.63438  | -0.50224 |
| C  | 1.87760  | -1.86138 | -0.11128 | C  | -0.34922 | -0.07781 | 2.87190  |
| O  | 1.47590  | -1.52377 | 1.04683  | O  | 0.17898  | -0.44741 | 1.76248  |
| O  | 1.46409  | -1.39930 | -1.22194 | O  | -1.44181 | 0.56629  | 2.98854  |
| C  | 1.87620  | 1.86275  | 0.11120  | C  | -3.01852 | -1.69123 | 0.76067  |
| O  | 1.46302  | 1.40037  | 1.22185  | O  | -1.91199 | -1.70982 | 0.11601  |
| O  | 1.47479  | 1.52482  | -1.04693 | O  | -3.52491 | -0.67296 | 1.33476  |
| C  | -2.94840 | 2.91017  | 0.17450  | N  | 1.07395  | 0.25877  | -2.49904 |
| C  | -2.86787 | 4.07620  | -0.59826 | N  | 0.79698  | 1.02899  | -3.24948 |
| C  | -4.06476 | 2.75555  | 1.00693  | C  | 0.81179  | -0.97985 | -1.24531 |
| C  | -3.85550 | 5.05748  | -0.53973 | C  | 2.04982  | -0.88105 | -0.48812 |
| C  | -5.06869 | 3.71982  | 1.06527  | N  | 3.03189  | -0.10358 | -0.79168 |
| C  | -4.96042 | 4.87566  | 0.29195  | H  | 2.03885  | -1.49156 | 0.42430  |
| C  | -2.94621 | -2.91241 | -0.17443 | C  | -0.74366 | -2.40411 | -2.59767 |
| C  | -4.06302 | -2.75840 | -1.00634 | C  | -1.02115 | -3.57434 | -3.30228 |
| C  | -2.86432 | -4.07872 | 0.59777  | C  | 0.51892  | -2.21840 | -1.99571 |
| C  | -5.06612 | -3.72352 | -1.06471 | H  | -1.99516 | -3.70542 | -3.76789 |
| C  | -3.85110 | -5.06086 | 0.53918  | C  | -0.05647 | -4.58650 | -3.39643 |
| C  | -4.95652 | -4.87962 | -0.29197 | C  | 1.49061  | -3.23621 | -2.11708 |
| C  | 2.94841  | -2.91012 | -0.17451 | H  | -0.28112 | -5.50341 | -3.93731 |
| C  | 2.86737  | -4.07670 | 0.59738  | H  | 2.47654  | -3.10423 | -1.67819 |
| C  | 4.06534  | -2.75492 | -1.00607 | C  | 1.19804  | -4.41862 | -2.79700 |
| C  | 3.85506  | -5.05792 | 0.53884  | H  | 1.94898  | -5.20164 | -2.87114 |
| C  | 5.06933  | -3.71912 | -1.06438 | H  | -1.49571 | -1.62802 | -2.50633 |
| C  | 4.96055  | -4.87550 | -0.29195 | S  | 4.29672  | -0.01473 | 0.37427  |
| C  | 2.94617  | 2.91236  | 0.17443  | O  | 4.07291  | -0.97303 | 1.47330  |
| C  | 4.06302  | 2.75828  | 1.00627  | O  | 4.46903  | 1.41279  | 0.66624  |
| C  | 2.86427  | 4.07873  | -0.59769 | C  | 5.69037  | -0.58552 | -0.59820 |
| C  | 5.06614  | 3.72339  | 1.06466  | C  | 6.17429  | -1.88194 | -0.41016 |
| C  | 3.85107  | 5.06084  | -0.53908 | C  | 6.28166  | 0.28316  | -1.52242 |
| C  | 4.95652  | 4.87954  | 0.29201  | C  | 7.26603  | -2.31346 | -1.16941 |
| F  | -6.13525 | -3.54545 | -1.85135 | C  | 7.36780  | -0.16749 | -2.27248 |
| F  | -4.21725 | -1.65143 | -1.74466 | C  | 7.87757  | -1.46851 | -2.10907 |
| F  | -5.90980 | -5.81275 | -0.34800 | H  | 5.71405  | -2.53534 | 0.32597  |
| F  | -3.74191 | -6.17774 | 1.26971  | H  | 5.90375  | 1.29457  | -1.64513 |
| F  | -1.80782 | -4.30056 | 1.38932  | H  | 7.64869  | -3.32140 | -1.02134 |
| F  | 1.81085  | -4.29970 | 1.38858  | H  | 7.82983  | 0.50478  | -2.99319 |
| F  | 3.74666  | -6.17508 | 1.26908  | C  | 9.07538  | -1.92906 | -2.90820 |
| F  | 5.91468  | -5.80775 | -0.34792 | H  | 9.17041  | -3.01854 | -2.89909 |
| F  | 6.13853  | -3.53989 | -1.85067 | H  | 9.01005  | -1.59962 | -3.95021 |
| F  | 4.21887  | -1.64761 | -1.74405 | H  | 10.00092 | -1.51184 | -2.49284 |
| F  | 4.21729  | 1.65126  | 1.74451  | C  | -3.77947 | -2.97800 | 0.84077  |
| F  | 6.13531  | 3.54524  | 1.85124  | C  | -3.26049 | -4.14657 | 0.25994  |
| F  | 5.90982  | 5.81265  | 0.34805  | C  | -5.01826 | -3.02008 | 1.50129  |
| F  | 3.74185  | 6.17778  | -1.26953 | C  | -3.97452 | -5.34471 | 0.34027  |
| F  | 1.80773  | 4.30064  | -1.38918 | C  | -5.73071 | -4.21910 | 1.57797  |
| F  | -1.81190 | 4.29858  | -1.39036 | C  | -5.21042 | -5.38331 | 0.99827  |
| F  | -3.74759 | 6.17412  | -1.27083 | H  | -2.30082 | -4.10567 | -0.24613 |
| F  | -5.91450 | 5.80796  | 0.34793  | H  | -5.41042 | -2.11171 | 1.94886  |
| F  | -6.13734 | 3.54115  | 1.85242  | H  | -3.56789 | -6.24888 | -0.10768 |
| F  | -4.21775 | 1.64877  | 1.74580  | H  | -6.68996 | -4.24727 | 2.09017  |
|    |          |          |          | H  | -5.76539 | -6.31721 | 1.06040  |
|    |          |          |          | C  | -3.64215 | 1.67085  | -2.86298 |
|    |          |          |          | C  | -4.85344 | 2.37741  | -2.78147 |
|    |          |          |          | C  | -3.11675 | 1.33730  | -4.12192 |
|    |          |          |          | C  | -5.53082 | 2.74380  | -3.94661 |
|    |          |          |          | C  | -3.79558 | 1.70587  | -5.28587 |
|    |          |          |          | C  | -5.00374 | 2.40914  | -5.20048 |
|    |          |          |          | H  | -5.25211 | 2.63253  | -1.80420 |
|    |          |          |          | H  | -2.17835 | 0.79472  | -4.18051 |
|    |          |          |          | H  | -6.46863 | 3.29063  | -3.87825 |
|    |          |          |          | H  | -3.38339 | 1.44726  | -6.25879 |

|                                                        |          |          |          |          |                                       |          |          |          |
|--------------------------------------------------------|----------|----------|----------|----------|---------------------------------------|----------|----------|----------|
|                                                        | H        | -5.53181 | 2.69621  | -6.10745 |                                       |          |          |          |
|                                                        | C        | 0.58759  | 4.10290  | 0.54848  |                                       |          |          |          |
|                                                        | C        | -0.00446 | 5.32181  | 0.91852  |                                       |          |          |          |
|                                                        | C        | 1.94554  | 4.06336  | 0.19216  |                                       |          |          |          |
|                                                        | C        | 0.75233  | 6.49546  | 0.91507  |                                       |          |          |          |
|                                                        | C        | 2.70186  | 5.23819  | 0.20411  |                                       |          |          |          |
|                                                        | C        | 2.10677  | 6.45531  | 0.55858  |                                       |          |          |          |
|                                                        | H        | -1.05251 | 5.33814  | 1.20322  |                                       |          |          |          |
|                                                        | H        | 2.40723  | 3.11538  | -0.06631 |                                       |          |          |          |
|                                                        | H        | 0.28954  | 7.43952  | 1.19433  |                                       |          |          |          |
|                                                        | H        | 3.75733  | 5.20183  | -0.05612 |                                       |          |          |          |
|                                                        | H        | 2.69764  | 7.36911  | 0.56366  |                                       |          |          |          |
|                                                        | C        | 0.37656  | -0.43824 | 4.12813  |                                       |          |          |          |
|                                                        | C        | 1.70415  | -0.89413 | 4.08044  |                                       |          |          |          |
|                                                        | C        | -0.27503 | -0.31105 | 5.36650  |                                       |          |          |          |
|                                                        | C        | 2.37065  | -1.21998 | 5.26474  |                                       |          |          |          |
|                                                        | C        | 0.39159  | -0.64945 | 6.54590  |                                       |          |          |          |
|                                                        | C        | 1.71605  | -1.10377 | 6.49709  |                                       |          |          |          |
|                                                        | H        | 2.21847  | -0.97191 | 3.12771  |                                       |          |          |          |
|                                                        | H        | -1.29884 | 0.05020  | 5.39246  |                                       |          |          |          |
|                                                        | H        | 3.40318  | -1.55964 | 5.22431  |                                       |          |          |          |
|                                                        | H        | -0.11831 | -0.55597 | 7.50229  |                                       |          |          |          |
|                                                        | H        | 2.23708  | -1.36132 | 7.41709  |                                       |          |          |          |
| Rh <sub>2</sub> (p-NO <sub>2</sub> PhCOO) <sub>4</sub> |          |          |          |          | Rh <sub>2</sub> (tBuCOO) <sub>4</sub> |          |          |          |
| C                                                      | 1.88498  | -1.87478 | 0.00004  |          | C                                     | -1.87750 | -1.89585 | 0.02103  |
| O                                                      | 1.46930  | -1.46144 | 1.13470  |          | O                                     | -1.46011 | -1.48700 | -1.11504 |
| O                                                      | 1.46929  | -1.46151 | -1.13463 |          | O                                     | -1.45785 | -1.46799 | 1.14763  |
| Rh                                                     | -0.00001 | -0.00004 | -1.19760 |          | Rh                                    | -0.00024 | 0.01173  | 1.19554  |
| Rh                                                     | -0.00006 | -0.00002 | 1.19763  |          | Rh                                    | 0.00023  | -0.01116 | -1.19551 |
| C                                                      | -1.87474 | -1.88506 | 0.00000  |          | C                                     | 1.89894  | -1.87420 | 0.02321  |
| O                                                      | -1.46147 | -1.46938 | 1.13467  |          | O                                     | 1.47900  | -1.46849 | -1.11312 |
| O                                                      | -1.46148 | -1.46934 | -1.13466 |          | O                                     | 1.47770  | -1.44747 | 1.14958  |
| C                                                      | 1.87468  | 1.88498  | 0.00002  |          | C                                     | -1.89910 | 1.87460  | -0.02314 |
| O                                                      | 1.46140  | 1.46929  | 1.13468  |          | O                                     | -1.47733 | 1.44843  | -1.14952 |
| O                                                      | 1.46142  | 1.46929  | -1.13464 |          | O                                     | -1.47945 | 1.46860  | 1.11319  |
| C                                                      | -1.88509 | 1.87468  | -0.00002 |          | C                                     | 1.87756  | 1.89633  | -0.02102 |
| O                                                      | -1.46939 | 1.46142  | 1.13467  |          | O                                     | 1.45835  | 1.46804  | -1.14761 |
| O                                                      | -1.46934 | 1.46140  | -1.13468 |          | O                                     | 1.45961  | 1.48805  | 1.11505  |
| C                                                      | -2.93009 | -2.94665 | -0.00001 |          | C                                     | -2.98018 | -2.96729 | 0.01133  |
| C                                                      | -3.42308 | -3.44319 | -1.21710 |          | C                                     | 2.98987  | -2.95764 | 0.01226  |
| C                                                      | -3.42352 | -3.44277 | 1.21709  |          | C                                     | -2.99071 | 2.95736  | -0.01213 |
| C                                                      | -4.40547 | -4.43174 | -1.22374 |          | C                                     | 2.98101  | 2.96696  | -0.01145 |
| C                                                      | -4.40594 | -4.43129 | 1.22372  |          | C                                     | -3.40794 | 3.33354  | -1.44435 |
| C                                                      | -4.88094 | -4.90980 | -0.00002 |          | H                                     | -3.80801 | 2.47143  | -1.98623 |
| H                                                      | -3.03428 | -3.05231 | -2.15201 |          | H                                     | -4.18522 | 4.10528  | -1.40645 |
| H                                                      | -3.03504 | -3.05157 | 2.15200  |          | H                                     | -2.56397 | 3.72587  | -2.01928 |
| H                                                      | -4.80036 | -4.82949 | -2.15240 |          | C                                     | -2.42481 | 4.19773  | 0.71804  |
| H                                                      | -4.80120 | -4.82869 | 2.15236  |          | H                                     | -1.55462 | 4.60620  | 0.19142  |
| C                                                      | 2.94676  | -2.92995 | 0.00006  |          | H                                     | -3.18998 | 4.98111  | 0.75869  |
| C                                                      | 3.44322  | -3.42307 | -1.21703 |          | H                                     | -2.12416 | 3.95306  | 1.74033  |
| C                                                      | 3.44309  | -3.42313 | 1.21718  |          | C                                     | -4.20715 | 2.40519  | 0.76674  |
| C                                                      | 4.43185  | -4.40538 | -1.22365 |          | H                                     | -4.99335 | 3.16735  | 0.80898  |
| C                                                      | 4.43175  | -4.40542 | 1.22384  |          | H                                     | -4.62538 | 1.51966  | 0.27440  |
| C                                                      | 4.91011  | -4.88056 | 0.00010  |          | H                                     | -3.93285 | 2.13264  | 1.78935  |
| H                                                      | 3.05217  | -3.03447 | -2.15194 |          | C                                     | -4.25279 | -2.31665 | -0.58270 |
| H                                                      | 3.05194  | -3.03458 | 2.15207  |          | H                                     | -4.07344 | -1.95045 | -1.59754 |
| H                                                      | 4.82948  | -4.80044 | -2.15229 |          | H                                     | -5.06082 | -3.05597 | -0.61888 |
| H                                                      | 4.82932  | -4.80048 | 2.15250  |          | H                                     | -4.59408 | -1.47685 | 0.03336  |
| C                                                      | 2.93000  | 2.94658  | 0.00003  |          | C                                     | -2.52579 | -4.13752 | -0.88933 |
| C                                                      | 3.42294  | 3.44319  | 1.21711  |          | H                                     | -3.31300 | -4.89885 | -0.92746 |
| C                                                      | 3.42349  | 3.44264  | -1.21707 |          | H                                     | -2.32072 | -3.79862 | -1.90801 |
| C                                                      | 4.40533  | 4.43173  | 1.22373  |          | H                                     | -1.61897 | -4.61216 | -0.49725 |
| C                                                      | 4.40592  | 4.43115  | -1.22372 |          | C                                     | -3.26592 | -3.47513 | 1.43536  |
| C                                                      | 4.88087  | 4.90974  | -0.00001 |          | H                                     | -3.59799 | -2.66645 | 2.09239  |
| H                                                      | 3.03409  | 3.05235  | 2.15202  |          | H                                     | -4.05480 | -4.23510 | 1.39970  |
| H                                                      | 3.03506  | 3.05139  | -2.15198 |          | H                                     | -2.37700 | -3.92720 | 1.88612  |
| H                                                      | 4.80018  | 4.82953  | 2.15238  |          | C                                     | 2.42096  | -4.19943 | -0.71324 |

|                                                              |          |          |          |                                             |          |          |          |
|--------------------------------------------------------------|----------|----------|----------|---------------------------------------------|----------|----------|----------|
| H                                                            | 4.80124  | 4.82847  | -2.15238 | H                                           | 1.55170  | -4.60565 | -0.18338 |
| C                                                            | -2.94679 | 2.92994  | -0.00004 | H                                           | 2.11807  | -3.95715 | -1.73545 |
| C                                                            | -3.44340 | 3.42293  | 1.21705  | H                                           | 3.18529  | -4.98363 | -0.75370 |
| C                                                            | -3.44290 | 3.42334  | -1.21715 | C                                           | 4.20485  | -2.40868 | -0.77108 |
| C                                                            | -4.43193 | 4.40534  | 1.22367  | H                                           | 4.99022  | -3.17170 | -0.81332 |
| C                                                            | -4.43149 | 4.40570  | -1.22380 | H                                           | 3.92828  | -2.13848 | -1.79368 |
| C                                                            | -4.90998 | 4.88074  | -0.00007 | H                                           | 4.62518  | -1.52229 | -0.28210 |
| H                                                            | -3.05253 | 3.03415  | 2.15196  | C                                           | 3.41030  | -3.33051 | 1.44442  |
| H                                                            | -3.05163 | 3.03491  | -2.15205 | H                                           | 3.81223  | -2.46730 | 1.98316  |
| H                                                            | -4.82964 | 4.80031  | 2.15231  | H                                           | 2.56748  | -3.72085 | 2.02236  |
| H                                                            | -4.82890 | 4.80092  | -2.15247 | H                                           | 4.18701  | -4.10283 | 1.40658  |
| N                                                            | 5.92135  | 5.95667  | -0.00008 | C                                           | 4.25460  | 2.31318  | 0.57709  |
| O                                                            | 6.32796  | 6.36628  | 1.09266  | H                                           | 4.07775  | 1.94448  | 1.59149  |
| O                                                            | 6.32854  | 6.36551  | -1.09290 | H                                           | 4.59308  | 1.47467  | -0.04225 |
| N                                                            | -5.95690 | 5.92121  | -0.00002 | H                                           | 5.06361  | 3.05145  | 0.61295  |
| O                                                            | -6.36605 | 6.32799  | 1.09281  | C                                           | 3.26324  | 3.47831  | -1.43494 |
| O                                                            | -6.36635 | 6.32783  | -1.09279 | H                                           | 3.59283  | 2.67111  | -2.09502 |
| N                                                            | -5.92137 | -5.95672 | -0.00009 | H                                           | 2.37341  | 3.93228  | -1.88203 |
| O                                                            | -6.32839 | -6.36591 | 1.09269  | H                                           | 4.05279  | 4.23759  | -1.39947 |
| O                                                            | -6.32791 | -6.36616 | -1.09294 | C                                           | 2.53064  | 4.13524  | 0.89366  |
| N                                                            | 5.95711  | -5.92092 | 0.00008  | H                                           | 3.31887  | 4.89552  | 0.93156  |
| O                                                            | 6.36680  | -6.32727 | 1.09292  | H                                           | 1.62325  | 4.61201  | 0.50550  |
| O                                                            | 6.36621  | -6.32777 | -1.09278 | H                                           | 2.32805  | 3.79387  | 1.91200  |
| TS2[Rh <sub>2</sub> (p-NO <sub>2</sub> PhCOO) <sub>4</sub> ] |          |          |          | TS2[Rh <sub>2</sub> (tBuCOO) <sub>4</sub> ] |          |          |          |
| C                                                            | -0.89679 | 1.83312  | -1.85109 | C                                           | 0.67182  | -2.65641 | -1.09302 |
| O                                                            | -0.88273 | 1.43070  | -0.63557 | O                                           | 0.02807  | -1.55093 | -1.02812 |
| O                                                            | -0.05992 | 1.51321  | -2.75264 | O                                           | 1.84278  | -2.84681 | -0.63685 |
| Rh                                                           | 1.44975  | 0.13941  | -2.32237 | Rh                                          | 2.85438  | -1.29935 | 0.33130  |
| Rh                                                           | 0.56087  | 0.06092  | -0.03757 | Rh                                          | 0.88525  | 0.09027  | -0.07134 |
| C                                                            | 2.63806  | 2.09630  | -0.49504 | C                                           | 2.90877  | 0.16751  | -2.21480 |
| O                                                            | 1.86974  | 1.63043  | 0.41916  | O                                           | 1.76587  | 0.65004  | -1.88779 |
| O                                                            | 2.69078  | 1.69503  | -1.69753 | O                                           | 3.59229  | -0.63252 | -1.50712 |
| C                                                            | -0.62819 | -1.87466 | -1.90445 | C                                           | 0.86583  | -1.39858 | 2.47791  |
| O                                                            | -0.68362 | -1.48828 | -0.68493 | O                                           | 0.16954  | -0.58132 | 1.77882  |
| O                                                            | 0.15375  | -1.41586 | -2.79555 | O                                           | 1.99571  | -1.87048 | 2.13868  |
| C                                                            | 2.87495  | -1.68822 | -0.54673 | C                                           | 3.08592  | 1.41858  | 1.38714  |
| O                                                            | 2.06244  | -1.33788 | 0.37585  | O                                           | 1.91194  | 1.62818  | 0.92359  |
| O                                                            | 2.88798  | -1.25033 | -1.74028 | O                                           | 3.73464  | 0.33038  | 1.28521  |
| N                                                            | -0.48529 | 1.72911  | 2.32316  | N                                           | -1.24786 | 0.93679  | -2.12339 |
| N                                                            | -0.24583 | 2.81293  | 2.33594  | N                                           | -0.99981 | 0.74369  | -3.18870 |
| C                                                            | -0.25438 | -0.00862 | 2.03717  | C                                           | -0.92841 | 1.33366  | -0.41676 |
| C                                                            | -1.63500 | -0.45650 | 1.91318  | C                                           | -2.03442 | 0.65551  | 0.24263  |
| N                                                            | -2.66091 | 0.31100  | 2.03691  | N                                           | -2.97382 | 0.02259  | -0.37230 |
| H                                                            | -1.71631 | -1.51161 | 1.62109  | H                                           | -1.95381 | 0.67436  | 1.33740  |
| C                                                            | 1.94956  | -0.21114 | 3.21332  | C                                           | 0.26470  | 3.47925  | -0.90463 |
| C                                                            | 2.72015  | -0.65659 | 4.28576  | C                                           | 0.32492  | 4.87154  | -0.88652 |
| C                                                            | 0.56399  | -0.47648 | 3.17338  | C                                           | -0.86380 | 2.80959  | -0.38686 |
| H                                                            | 3.78558  | -0.44032 | 4.31278  | H                                           | 1.19260  | 5.38068  | -1.29967 |
| C                                                            | 2.12799  | -1.39261 | 5.32123  | C                                           | -0.72080 | 5.61588  | -0.32408 |
| C                                                            | -0.02507 | -1.19891 | 4.23500  | C                                           | -1.92181 | 3.57117  | 0.15593  |
| H                                                            | 2.73472  | -1.74768 | 6.15145  | H                                           | -0.66375 | 6.70209  | -0.29995 |
| H                                                            | -1.09452 | -1.39497 | 4.23474  | H                                           | -2.80895 | 3.07522  | 0.54210  |
| C                                                            | 0.75532  | -1.66852 | 5.29128  | C                                           | -1.84097 | 4.96313  | 0.20492  |
| H                                                            | 0.29404  | -2.23603 | 6.09587  | H                                           | -2.65476 | 5.53871  | 0.63969  |
| H                                                            | 2.40935  | 0.34388  | 2.40294  | H                                           | 1.08121  | 2.89805  | -1.31958 |
| S                                                            | -4.17270 | -0.39599 | 1.59420  | S                                           | -4.04952 | -0.86979 | 0.63551  |
| O                                                            | -4.00735 | -1.82939 | 1.28645  | O                                           | -3.82182 | -0.56079 | 2.05946  |
| O                                                            | -4.73839 | 0.51019  | 0.58780  | O                                           | -3.98178 | -2.25972 | 0.16872  |
| C                                                            | -5.09356 | -0.23931 | 3.11941  | C                                           | -5.62317 | -0.16622 | 0.14343  |
| C                                                            | -5.27405 | -1.36244 | 3.93018  | C                                           | -6.26331 | 0.74351  | 0.98713  |
| C                                                            | -5.62994 | 1.00536  | 3.46881  | C                                           | -6.19514 | -0.55420 | -1.07369 |
| C                                                            | -5.99968 | -1.22802 | 5.11701  | C                                           | -7.49510 | 1.27789  | 0.59653  |
| C                                                            | -6.34809 | 1.11821  | 4.65887  | C                                           | -7.42239 | -0.00716 | -1.44691 |
| C                                                            | -6.54523 | 0.00788  | 5.50014  | C                                           | -8.09160 | 0.91470  | -0.62100 |
| H                                                            | -4.86839 | -2.32502 | 3.63117  | H                                           | -5.81287 | 1.01743  | 1.93726  |
| H                                                            | -5.49652 | 1.86504  | 2.81780  | H                                           | -5.69249 | -1.27704 | -1.71065 |
| H                                                            | -6.14783 | -2.10168 | 5.74855  | H                                           | -7.99897 | 1.98316  | 1.25450  |

|   |          |          |          |   |           |          |          |
|---|----------|----------|----------|---|-----------|----------|----------|
| H | -6.76735 | 2.08388  | 4.93506  | H | -7.87019  | -0.30548 | -2.39319 |
| C | -7.35418 | 0.14196  | 6.76974  | C | -9.43480  | 1.47497  | -1.03020 |
| H | -7.12487 | 1.07636  | 7.29181  | H | -9.70890  | 2.34477  | -0.42666 |
| H | -8.42743 | 0.15081  | 6.54352  | H | -9.43662  | 1.77517  | -2.08324 |
| H | -7.16759 | -0.68903 | 7.45568  | H | -10.22280 | 0.72222  | -0.90603 |
| C | 3.91106  | -2.71090 | -0.17985 | C | 3.45964   | 0.56630  | -3.59682 |
| C | 3.92788  | -3.26487 | 1.10990  | C | -0.05746  | -3.84891 | -1.73669 |
| C | 4.86241  | -3.11273 | -1.13070 | C | 0.26869   | -1.83227 | 3.82889  |
| C | 4.88849  | -4.21431 | 1.45376  | C | 3.74918   | 2.59366  | 2.13166  |
| C | 5.82991  | -4.05984 | -0.79940 | C | 3.19949   | 2.06440  | -3.85627 |
| C | 5.82699  | -4.59561 | 0.49121  | H | 3.58434   | 2.33978  | -4.84476 |
| H | 3.18515  | -2.94963 | 1.83550  | H | 2.13185   | 2.29687  | -3.82759 |
| H | 4.83799  | -2.67934 | -2.12551 | H | 3.70707   | 2.69082  | -3.11358 |
| H | 4.91746  | -4.65637 | 2.44382  | C | 4.96837   | 0.27128  | -3.68194 |
| H | 6.57428  | -4.38251 | -1.51940 | H | 5.17989   | -0.78830 | -3.51850 |
| C | 3.55889  | 3.21527  | -0.10365 | H | 5.34048   | 0.55005  | -4.67454 |
| C | 4.43515  | 3.75738  | -1.05734 | H | 5.52998   | 0.84227  | -2.93521 |
| C | 3.54929  | 3.71916  | 1.20646  | C | 2.70071   | -0.28468 | -4.64498 |
| C | 5.29857  | 4.79474  | -0.70953 | H | 3.06066   | -0.03843 | -5.65051 |
| C | 4.40688  | 4.75655  | 1.56818  | H | 2.86645   | -1.35495 | -4.48024 |
| C | 5.27011  | 5.27782  | 0.60123  | H | 1.62415   | -0.09152 | -4.60997 |
| H | 4.43416  | 3.36119  | -2.06777 | C | -0.88159  | -3.37287 | -2.95010 |
| H | 2.86754  | 3.29818  | 1.93783  | H | -1.40757  | -4.22630 | -3.39312 |
| H | 5.98270  | 5.22617  | -1.43237 | H | -1.62329  | -2.62570 | -2.65833 |
| H | 4.41313  | 5.16024  | 2.57493  | H | -0.23824  | -2.93688 | -3.72333 |
| C | -2.00419 | 2.76681  | -2.23536 | C | -1.00751  | -4.42599 | -0.65710 |
| C | -1.88616 | 3.54202  | -3.40019 | H | -1.53475  | -5.29677 | -1.06421 |
| C | -3.15822 | 2.85262  | -1.44079 | H | -0.44676  | -4.75584 | 0.22473  |
| C | -2.90546 | 4.41943  | -3.76403 | H | -1.75495  | -3.69118 | -0.34434 |
| C | -4.19106 | 3.71627  | -1.80368 | C | 0.95382   | -4.92478 | -2.17390 |
| C | -4.04363 | 4.49287  | -2.95560 | H | 1.65637   | -4.53565 | -2.91883 |
| H | -0.99439 | 3.45499  | -4.01318 | H | 1.53702   | -5.29596 | -1.32744 |
| H | -3.26087 | 2.22782  | -0.55938 | H | 0.41726   | -5.76934 | -2.62145 |
| H | -2.83066 | 5.03478  | -4.65407 | C | 1.24493   | -2.75327 | 4.58187  |
| H | -5.09742 | 3.78637  | -1.21216 | H | 2.19742   | -2.25348 | 4.78300  |
| C | -1.56839 | -2.96847 | -2.31478 | H | 0.80185   | -3.04667 | 5.54064  |
| C | -2.64814 | -3.32255 | -1.49067 | H | 1.46032   | -3.66162 | 4.01188  |
| C | -1.36539 | -3.63004 | -3.53706 | C | -0.01316  | -0.56555 | 4.66838  |
| C | -3.52134 | -4.33705 | -1.88208 | H | -0.71423  | 0.10012  | 4.15815  |
| C | -2.22482 | -4.65250 | -3.93303 | H | -0.44929  | -0.85261 | 5.63196  |
| C | -3.29135 | -4.99057 | -3.09503 | H | 0.90842   | -0.00700 | 4.86992  |
| H | -2.82235 | -2.79657 | -0.55769 | C | -1.05682  | -2.57999 | 3.55422  |
| H | -0.53275 | -3.33973 | -4.16996 | H | -0.88989  | -3.46822 | 2.93416  |
| H | -4.36769 | -4.61682 | -1.26416 | H | -1.49051  | -2.91338 | 4.50428  |
| H | -2.08120 | -5.18036 | -4.86960 | H | -1.78628  | -1.94052 | 3.05150  |
| N | -4.20575 | -6.07097 | -3.50801 | C | 3.82627   | 3.80100  | 1.17036  |
| O | -3.99310 | -6.62664 | -4.59219 | H | 2.83095   | 4.10025  | 0.83201  |
| O | -5.13523 | -6.36554 | -2.74788 | H | 4.28888   | 4.65239  | 1.68293  |
| N | -5.12685 | 5.41832  | -3.33503 | H | 4.43685   | 3.56910  | 0.28972  |
| O | -6.11943 | 5.48081  | -2.60040 | C | 2.86208   | 2.95290  | 3.34599  |
| O | -4.98405 | 6.08516  | -4.36670 | H | 2.78494   | 2.11118  | 4.04375  |
| N | 6.18146  | 6.37488  | 0.97776  | H | 3.30186   | 3.79808  | 3.88801  |
| O | 6.93589  | 6.82365  | 0.10790  | H | 1.85276   | 3.23024  | 3.03002  |
| O | 6.14105  | 6.78495  | 2.14341  | C | 5.16168   | 2.21232  | 2.60781  |
| N | 6.84843  | -5.59680 | 0.85032  | H | 5.81107   | 1.94822  | 1.76785  |
| O | 6.83129  | -6.05391 | 1.99921  | H | 5.61108   | 3.06158  | 3.13569  |
| O | 7.66721  | -5.92425 | -0.01573 | H | 5.13838   | 1.35767  | 3.29002  |
